# Supplementary material for: Germline DNA Retention in Murine and Human Rearranged T Cell Receptor Gene Coding Joints: Alternative Recombination Signal Sequences and V(D)J Recombinase Errors
Source: Front Immunol. 2019 Nov 8;10:2637. doi: 10.3389/fimmu.2019.02637 (PMC6857471; doi:10.3389/fimmu.2019.02637)
Supplement: Supplementary file 2 [file Table_2.xlsx]

## Sheet: TRBJ1-07
Supplemental Table 2:
Rearranged TR genes using TRBJ1-7 and TRBJ1-2 in C57BL/6 and Balb/c mice.
The sequences are aligned on the left. The first 6 nt of TRBJ1-7 are shown. Then, from left to right, are shown: the sequence of GL DNA retained in the D-J coding joint (red), the N-D-N region (D nucleotides in yellow, N nucleotides in black), and the end of the V gene. the different elements are spaced by double hyphens. When GL DNA retention extends upstream of the -40 RSS, the extra nucleotide…
Source	seq ID	V gene	GL retention length	TRB gene sequence
				Germline sequence: TCTACTTTGCGGCAGGCACCCGGCTCACTGTG--ACAGGTATGGGGGCTCCATTTCTGACTGGAGGGGTTGTG--CCTGTGT
C57BL_6-Thymus-1	89830	TRBV03-01	66	CTGTGCCAGCAGCT--TTTGCGGCAGGCACCCGGCTCACTGTG--ACAGGTATGGGGGCTCCATTTCTGACTGGAGGGGTTGTG--CCTGTGT
C57BL_6-Spleen-1	64109	unresolved	63	TCTGTGCCAGCTCTC--CC--GCGGCAGGCACCCGGCTCACTGTG--ACAGGTATGGGGGCTCCATTTCTGACTGGAGGGGTTGTG--CCTGTGT
BALB_C-Thymus-1	271205	unresolved	60	TTCTGTGCCAGCAGC--GGGTA--GCAGGCACCCGGCTCACTGTG--ACAGGTATGGGGGCTCCATTTCTGACTGGAGGGGTTGTG--CCTGTGT
C57BL_6-Thymus-1	113288	unresolved	59	TCTGTGCCAGCAGTCTG--CCCT--CAGGCACCCGGCTCACTGTG--ACAGGTATGGGGGCTCCATTTCTGACTGGAGGGGTTGTG--CCTGTGT
BALB_C-Thymus-2	156498	TRBV19-01	58	CGTTTTTCTCTGTGCCAGCAGT--AGGCACCCGGCTCACTGTG--ACAGGTATGGGGGCTCCATTTCTGACTGGAGGGGTTGTG--CCTGTGT
C57BL_6-Thymus-2	136014	TRBV02-01	57	CACATACTTCTGTGCCAG--CAGGC-- GGCACCCGGCTCACTGTG--ACAGGTATGGGGGCTCCATTTCTGACTGGAGGGGTTGTG--CCTGTGT
BALB_C-Thymus-1	280759	TRBV05-01	57	ATTTTTGTGCCAGCAGCC--CCCCC-- GGCACCCGGCTCACTGTG--ACAGGTATGGGGGCTCCATTTCTGACTGGAGGGGTTGTG--CCTGTGT
BALB_C-Spleen-2	11017	TRBV13-01	57	GTACTTCTGTGCCAGCAGTGAT--T--GGCACCCGGCTCACTGTG--ACAGGTATGGGGGCTCCATTTCTGACTGGAGGGGTTGTG--CCTGTGT
C57BL_6-Thymus-1	172001	TRBV31-01	57	CTACCTCTGTGCCTGGAG--CCCCG--GGCACCCGGCTCACTGTG--ACAGGTATGGGGGCTCCATTTCTGACTGGAGGGGTTGTG--CCTGTGT
C57BL_6-Thymus-1	276733	TRBV03-01	55	CTGTGTACTTCTGTGCCAGC--TACGA--CACCCGGCTCACTGTG--ACAGGTATGGGGGCTCCATTTCTGACTGGAGGGGTTGTG--CCTGTGT
C57BL_6-Thymus-2	245646	TRBV12-02	54	CCGTGTACTTCTGTGCCAGCTC--CGCC--ACCCGGCTCACTGTG--ACAGGTATGGGGGCTCCATTTCTGACTGGAGGGGTTGTG--CCTGTGT
C57BL_6-Thymus-2	161888	TRBV21-01	52	ACTTCTGTGCTAGCAGTCAAT--GGAGGGG--CCGGCTCACTGTG--ACAGGTATGGGGGCTCCATTTCTGACTGGAGGGGTTGTG--CCTGTGT
C57BL_6-Thymus-1	191160	TRBV19-01	44	AACGAGATGGCCGTTTTTCTCTGTGCCAGCA--CCCTC--CTGTG--ACAGGTATGGGGGCTCCATTTCTGACTGGAGGGGTTGTG--CCTGTGT
BALB_C-Spleen-1	29921	TRBV13-02	42	TCAGACATCAGTGTACTTCTGTGCCAGCGGTGATG--GGG--GTG--ACAGGTATGGGGGCTCCATTTCTGACTGGAGGGGTTGTG--CCTGTGT
BALB_C-Thymus-2	90280	TRBV13-02	42	ACATCAGTGTACTTCTGTGCCAGCGGT--CCTGACAGGGG--GTG--ACAGGTATGGGGGCTCCATTTCTGACTGGAGGGGTTGTG--CCTGTGT
BALB_C-Spleen-2	62354	TRBV29-01	41	AACAAACCAGACATCTGTGTACTTCTGTGCTAGCAG--CCT--TG--ACAGGTATGGGGGCTCCATTTCTGACTGGAGGGGTTGTG--CCTGTGT
C57BL_6-Thymus-2	49128	TRBV20-01	41	ATATCTTGAAGACAGAGGCTTATATCTCTGTGGTGCT--TC--TG--ACAGGTATGGGGGCTCCATTTCTGACTGGAGGGGTTGTG--CCTGTGT
BALB_C-Thymus-1	71482	TRBV03-01	41	TGGAGGACTCAGCTGTGTACTTCTGTGCCAGCAGCTTA--A--TG--ACAGGTATGGGGGCTCCATTTCTGACTGGAGGGGTTGTG--CCTGTGT
BALB_C-Thymus-2	86717	TRBV31-01	40	TCTGGCTTCTACCTCTGTGCCTGGAGTCT--AGAGGACAACG--G--ACAGGTATGGGGGCTCCATTTCTGACTGGAGGGGTTGTG--CCTGTGT
BALB_C-Thymus-1	76452	TRBV31-01	40	CCACTCTGGCTTCTACCTCTGTGCCTGGAGTCT--GCCAGGG--G--ACAGGTATGGGGGCTCCATTTCTGACTGGAGGGGTTGTG--CCTGTGT
BALB_C-Thymus-1	77236	TRBV31-01	40	CTCAGCCACTCTGGCTTCTACCTCTGTGCCTGGAGTCT--AG--G--ACAGGTATGGGGGCTCCATTTCTGACTGGAGGGGTTGTG--CCTGTGT
BALB_C-Thymus-1	131828	TRBV29-01	40	CAGACATCTGTGTACTTCTGTGCTAGCAGTT--CCCGGGACC--G--ACAGGTATGGGGGCTCCATTTCTGACTGGAGGGGTTGTG--CCTGTGT
C57BL_6-Thymus-1	68511	TRBV29-01	40	AAACCAGACATCTGTGTACTTCTGTGCTAGCAGTT--AGGCA--G--ACAGGTATGGGGGCTCCATTTCTGACTGGAGGGGTTGTG--CCTGTGT
C57BL_6-Spleen-1	39311	TRBV26-01	40	TCAGCACTGTACCTCTGTGCCAGCAGTCTG--GGACAGGGGG--G--ACAGGTATGGGGGCTCCATTTCTGACTGGAGGGGTTGTG--CCTGTGT
C57BL_6-Thymus-2	194927	TRBV24-01	40	ACTCAGCACTGTAGCTCTGTGCCAGCAGTCTGT--TCGGCAA--G--ACAGGTATGGGGGCTCCATTTCTGACTGGAGGGGTTGTG--CCTGTGT
BALB_C-Thymus-2	271507	TRBV20-01	40	TGAAGACAGAGGCTTATATCTCTGTGG--GCCAGGGATGAGG--G--ACAGGTATGGGGGCTCCATTTCTGACTGGAGGGGTTGTG--CCTGTGT
C57BL_6-Thymus-1	272151	TRBV16-01	40	CTCAGCGGTGTATCTTTGTGCAAGCAGC--CGCCGGGACAGG--G--ACAGGTATGGGGGCTCCATTTCTGACTGGAGGGGTTGTG--CCTGTGT
C57BL_6-Thymus-1	303619	TRBV15-01	40	CAAGGACTCAGCTGTGTATCTGTGTGCCAGCAG--AAGGGGA--G--ACAGGTATGGGGGCTCCATTTCTGACTGGAGGGGTTGTG--CCTGTGT
C57BL_6-Thymus-1	303620	TRBV15-01	40	CAAGGACTCAGCTGTGTATCTGTGTGCTAGCAG--AAGGGGA--G--ACAGGTATGGGGGCTCCATTTCTGACTGGAGGGGTTGTG--CCTGTGT
BALB_C-Thymus-1	79053	TRBV13-03	40	CTTTCTCAGACAGCTGTATATTTCTGTGCCA--CCCCACAGA--G--ACAGGTATGGGGGCTCCATTTCTGACTGGAGGGGTTGTG--CCTGTGT
C57BL_6-Thymus-1	166713	TRBV13-02	40	AGTGTACTTCTGTGCCAGCGGTGA--GCCCGGGACAAGGGGA--G--ACAGGTATGGGGGCTCCATTTCTGACTGGAGGGGTTGTG--CCTGTGT
BALB_C-Spleen-1	46042	TRBV13-01	40	CATCTTTGTACTTCTGTGCCAGCAGTGATG--CAACAGAGAA--G--ACAGGTATGGGGGCTCCATTTCTGACTGGAGGGGTTGTG--CCTGTGT
C57BL_6-Thymus-2	175686	TRBV13-01	40	CTTCTGTGCCAGCAGTGA--ACTCGCGGGACAGGGGACGGGC--G--ACAGGTATGGGGGCTCCATTTCTGACTGGAGGGGTTGTG--CCTGTGT
BALB_C-Thymus-1	5193	TRBV13-01	40	CTCTCAGACATCTTTGTACTTCTGTGCCAGCAGTGA--GGGA--G--ACAGGTATGGGGGCTCCATTTCTGACTGGAGGGGTTGTG--CCTGTGT
C57BL_6-Thymus-1	88589	TRBV13-01	40	CTCCCTCTCAGACATCTTTGTACTTCTGTGCCAGCAGTGA--G--ACAGGTATGGGGGCTCCATTTCTGACTGGAGGGGTTGTG--CCTGTGT
BALB_C-Thymus-1	206856	TRBV12-01	40	GAGGACTCTGCTATGTACTTCTGTGCCAGCTCTCT--ATGGA--G--ACAGGTATGGGGGCTCCATTTCTGACTGGAGGGGTTGTG--CCTGTGT
C57BL_6-Thymus-2	252808	TRBV12-01	40	CTGGAGGACTCTGCTATGTACTTCTGTGCCAGCTCTC--GGA--G--ACAGGTATGGGGGCTCCATTTCTGACTGGAGGGGTTGTG--CCTGTGT
C57BL_6-Thymus-1	86750	TRBV05-01	40	CAGCTGTCTATTTTTGTGCCAGCAGCCAAGA--TAGAGGGGA--G--ACAGGTATGGGGGCTCCATTTCTGACTGGAGGGGTTGTG--CCTGTGT
C57BL_6-Thymus-2	129315	TRBV05-01	40	AAGACTCAGCTGTCTATTTTTGTGCCAGCAGCC--CCCGCCA--G--ACAGGTATGGGGGCTCCATTTCTGACTGGAGGGGTTGTG--CCTGTGT
C57BL_6-Thymus-1	245121	TRBV04-01	40	GACTCTGCTGTGTATCTCTGTGCCAGCAGCTAA--GAGGGGG--G--ACAGGTATGGGGGCTCCATTTCTGACTGGAGGGGTTGTG--CCTGTGT
C57BL_6-Thymus-1	171848	TRBV04-01	40	CGGAGGACTCTGCTGTGTATCTCTGTGCCAGCAGCTAA--CA--G--ACAGGTATGGGGGCTCCATTTCTGACTGGAGGGGTTGTG--CCTGTGT
BALB_C-Spleen-2	42332	TRBV03-01	40	GAGGACTCAGCTGTGTACTTCTGTGCCAGCAGCTT--GGGGG--G--ACAGGTATGGGGGCTCCATTTCTGACTGGAGGGGTTGTG--CCTGTGT
C57BL_6-Thymus-1	129703	TRBV02-01	40	GATGACTCGGCCACATACTTCTGTGCCAGCAGCCAAGA--CG--G--ACAGGTATGGGGGCTCCATTTCTGACTGGAGGGGTTGTG--CCTGTGT
C57BL_6-Thymus-2	280821	TRBV01-01	40	AGGGCAGAACCTTGTACTGCACCTGCAG--GTCTACAGGGGA--G--ACAGGTATGGGGGCTCCATTTCTGACTGGAGGGGTTGTG--CCTGTGT
C57BL_6-Thymus-1	52787	TRBV01-01	40	GAGCCAGGGCAGAACCTTGTACTGCACCTGCAGTGC--GGGA--G--ACAGGTATGGGGGCTCCATTTCTGACTGGAGGGGTTGTG--CCTGTGT
BALB_C-Thymus-1	124349	unresolved	39	21--TCTGTGTACTTCTGTGCTAGCAGTC--TCTCCGGGACAGGGAT--ACAGGTATGGGGGCTCCATTTCTGACTGGAGGGGTTGTG--CCTGTGT
BALB_C-Thymus-1	74366	TRBV31-01	39	ACTCTGGCTTCTACCTCTGTGCCTGCC--CGGGACCCTATCTT--ACAGGTATGGGGGCTCCATTTCTGACTGGAGGGGTTGTG--CCTGTGT
BALB_C-Thymus-2	76701	TRBV31-01	39	ACTCTGGCTTCTACCTCTGTGCCTGGAGT--CGCCCGGGGGGT--ACAGGTATGGGGGCTCCATTTCTGACTGGAGGGGTTGTG--CCTGTGT
C57BL_6-Spleen-2	53220	TRBV31-01	39	AGCCACTCTGGCTTCTACCTCTGTGCCTGGAG--CCAGACAGA--ACAGGTATGGGGGCTCCATTTCTGACTGGAGGGGTTGTG--CCTGTGT
BALB_C-Thymus-2	29467	TRBV31-01	39	CACTCTGGCTTCTACCTCTGTGCCTGGAGTCT--ACACAGTTT--ACAGGTATGGGGGCTCCATTTCTGACTGGAGGGGTTGTG--CCTGTGT
C57BL_6-Thymus-2	148554	TRBV31-01	39	TCAGCCACTCTGGCTTCTACCTCTGTGCCTGGA--AGGGACTC--ACAGGTATGGGGGCTCCATTTCTGACTGGAGGGGTTGTG--CCTGTGT
BALB_C-Thymus-1	169822	TRBV31-01	39	AGCCACTCTGGCTTCTACCTCTGTGCCTGGAGTCT--AGTCCA--ACAGGTATGGGGGCTCCATTTCTGACTGGAGGGGTTGTG--CCTGTGT
BALB_C-Thymus-1	181761	TRBV31-01	39	GCTTCTACCTCTGTGCCTGG--GCCGGGGTGGACAGGGGCGGT--ACAGGTATGGGGGCTCCATTTCTGACTGGAGGGGTTGTG--CCTGTGT
C57BL_6-Thymus-1	188337	TRBV31-01	39	TTCTCAGCCACTCTGGCTTCTACCTCTGTGCCT--ACCCACAG--ACAGGTATGGGGGCTCCATTTCTGACTGGAGGGGTTGTG--CCTGTGT
BALB_C-Spleen-2	35169	TRBV31-01	39	TTCTCAGCCACTCTGGCTTCTACCTCTGTGCCT--TCCGGGAC--ACAGGTATGGGGGCTCCATTTCTGACTGGAGGGGTTGTG--CCTGTGT
C57BL_6-Thymus-2	141545	TRBV31-01	39	CTCTGGCTTCTACCTCTGTGCCTGGAGT--TTTACAGGGGGGT--ACAGGTATGGGGGCTCCATTTCTGACTGGAGGGGTTGTG--CCTGTGT
BALB_C-Thymus-2	134586	TRBV31-01	39	CTCTGGCTTCTACCTCTGTGCCTGGAGTC--CAGACAGGGTGT--ACAGGTATGGGGGCTCCATTTCTGACTGGAGGGGTTGTG--CCTGTGT
BALB_C-Thymus-1	251331	TRBV30-01	39	AGCAGTATCTATTTCTGTAGTTCTAGAGA--TGGGACAAAAGT--ACAGGTATGGGGGCTCCATTTCTGACTGGAGGGGTTGTG--CCTGTGT
C57BL_6-Thymus-2	130389	TRBV29-01	39	ACCAGACATCTGTGTACTTCTGTGCTAG--ACCCGACAGATCT--ACAGGTATGGGGGCTCCATTTCTGACTGGAGGGGTTGTG--CCTGTGT
BALB_C-Thymus-1	48289	TRBV29-01	39	ACCAGACATCTGTGTACTTCTGTGCTAGCAGTTT--GGACAAT--ACAGGTATGGGGGCTCCATTTCTGACTGGAGGGGTTGTG--CCTGTGT
BALB_C-Thymus-1	24403	TRBV29-01	39	ACAAACCAGACATCTGTGTACTTCTGTGCTAGCAG--ACAGGC--ACAGGTATGGGGGCTCCATTTCTGACTGGAGGGGTTGTG--CCTGTGT
C57BL_6-Thymus-1	192743	TRBV29-01	39	ACAAACCAGACATCTGTGTACTTCTGTGCTAGCAG--GACAAT--ACAGGTATGGGGGCTCCATTTCTGACTGGAGGGGTTGTG--CCTGTGT
BALB_C-Thymus-2	195447	TRBV29-01	39	TAAAACAAACCAGACATCTGTGTACTTCTGTGCTAGCA--CTT--ACAGGTATGGGGGCTCCATTTCTGACTGGAGGGGTTGTG--CCTGTGT
BALB_C-Thymus-2	64639	TRBV29-01	39	ACATCTGTGTACTTCTGTGCTAGCAG--GACCGGGACAGGGTT--ACAGGTATGGGGGCTCCATTTCTGACTGGAGGGGTTGTG--CCTGTGT
C57BL_6-Thymus-1	227890	TRBV29-01	39	AGACATCTGTGTACTTCTGTGCTAGCAGT--CCGCACAGGGGA--ACAGGTATGGGGGCTCCATTTCTGACTGGAGGGGTTGTG--CCTGTGT
C57BL_6-Spleen-1	1738	TRBV29-01	39	AGACATCTGTGTACTTCTGTGCTAGCAG--GACGGGACAGGGA--ACAGGTATGGGGGCTCCATTTCTGACTGGAGGGGTTGTG--CCTGTGT
BALB_C-Thymus-1	36259	TRBV29-01	39	AACCAGACATCTGTGTACTTCTGTGCTAGCA--TCGGACAGGC--ACAGGTATGGGGGCTCCATTTCTGACTGGAGGGGTTGTG--CCTGTGT
BALB_C-Spleen-1	18492	TRBV29-01	39	ACATCTGTGTACTTCTGTGCTAGCAGTTTATC--CCGGGACAT--ACAGGTATGGGGGCTCCATTTCTGACTGGAGGGGTTGTG--CCTGTGT
C57BL_6-Thymus-2	286475	TRBV29-01	39	CAGACATCTGTGTACTTCTGTGCTAGCAGT--CGGGACAGGGT--ACAGGTATGGGGGCTCCATTTCTGACTGGAGGGGTTGTG--CCTGTGT
BALB_C-Spleen-1	22748	TRBV29-01	39	AAACCAGACATCTGTGTACTTCTGTGCTAGCA--ACAGGGGGC--ACAGGTATGGGGGCTCCATTTCTGACTGGAGGGGTTGTG--CCTGTGT
BALB_C-Spleen-1	20628	TRBV29-01	39	ACATCTGTGTACTTCTGTGCTAGCAGTTTAT--ACAGGGGGGA--ACAGGTATGGGGGCTCCATTTCTGACTGGAGGGGTTGTG--CCTGTGT
BALB_C-Thymus-1	110550	TRBV29-01	39	AACCAGACATCTGTGTACTTCTGTGCTAGCAGTTTATC--GGG--ACAGGTATGGGGGCTCCATTTCTGACTGGAGGGGTTGTG--CCTGTGT
C57BL_6-Thymus-1	247917	TRBV26-01	39	TCAGCACTGTACCTCTGTGCCAGCAGTCT--ACCGGGAAAACT--ACAGGTATGGGGGCTCCATTTCTGACTGGAGGGGTTGTG--CCTGTGT
C57BL_6-Thymus-2	65579	TRBV26-01	39	GAGACTCAGCACTGTACCTCTGTGCCAGCAG--CCGAGGGCGC--ACAGGTATGGGGGCTCCATTTCTGACTGGAGGGGTTGTG--CCTGTGT
BALB_C-Thymus-1	236382	TRBV26-01	39	GGAGACTCAGCACTGTACCTCTGTGCCAGCAG--AGACAAAAT--ACAGGTATGGGGGCTCCATTTCTGACTGGAGGGGTTGTG--CCTGTGT
BALB_C-Thymus-1	105193	TRBV26-01	39	GAGGCAGGAGACTCAGCACTGTACCTCTGTGCCA--TCCCGAA--ACAGGTATGGGGGCTCCATTTCTGACTGGAGGGGTTGTG--CCTGTGT
C57BL_6-Thymus-1	47927	TRBV26-01	39	AGACTCAGCACTGTACCTCTGTGCCAGCAGTCTG--CAACCCA--ACAGGTATGGGGGCTCCATTTCTGACTGGAGGGGTTGTG--CCTGTGT
BALB_C-Thymus-1	294240	TRBV26-01	39	GACTCAGCACTGTACCTCTGTGCCAGCAGTCTGTC--GATAGT--ACAGGTATGGGGGCTCCATTTCTGACTGGAGGGGTTGTG--CCTGTGT
C57BL_6-Thymus-2	53622	TRBV26-01	39	GACTCAGCACTGTACCTCTGTGCCAGCAGTCTGT--GAGGGGC--ACAGGTATGGGGGCTCCATTTCTGACTGGAGGGGTTGTG--CCTGTGT
BALB_C-Spleen-2	42298	TRBV26-01	39	GAGACTCAGCACTGTACCTCTGTGCCAGCAGTCTG--CCGATA--ACAGGTATGGGGGCTCCATTTCTGACTGGAGGGGTTGTG--CCTGTGT
BALB_C-Spleen-2	85821	TRBV26-01	39	GAGACTCAGCACTGTACCTCTGTGCCAGCAGTCTG--CCGATA--ACAGGTATGGGGGCTCCATTTCCGACTGGAGGGGTTGTG--CCTGTGT
BALB_C-Thymus-1	181842	TRBV26-01	39	GGAGACTCAGCACTGTACCTCTGTGCCAGCAGTCTG--GGGGC--ACAGGTATGGGGGCTCCATTTCTGACTGGAGGGGTTGTG--CCTGTGT
BALB_C-Thymus-2	64781	TRBV26-01	39	ACTCAGCACTGTACCTCTGTGCCAGCAGTCT--ACACAGGGGA--ACAGGTATGGGGGCTCCATTTCTGACTGGAGGGGTTGTG--CCTGTGT
BALB_C-Thymus-1	197591	TRBV26-01	39	CAGCACTGTACCTCTGTGCCAGCAGTCTG--TGGGGACAGGGG--ACAGGTATGGGGGCTCCATTTCTGACTGGAGGGGTTGTG--CCTGTGT
BALB_C-Thymus-1	180876	TRBV26-01	39	GACTCAGCACTGTACCTCTGTGCCAGCAGTC--GGGACAGAAA--ACAGGTATGGGGGCTCCATTTCTGACTGGAGGGGTTGTG--CCTGTGT
BALB_C-Thymus-1	158599	TRBV26-01	39	GGAGACTCAGCACTGTACCTCTGTGCCAGCAGTC--AGGGGGC--ACAGGTATGGGGGCTCCATTTCTGACTGGAGGGGTTGTG--CCTGTGT
BALB_C-Thymus-1	251330	TRBV24-01	39	AGCACTGTAGCTCTGTGCCAGCAGTCT--CCAATACGACTCCA--ACAGGTATGGGGGCTCCATTTCTGACTGGAGGGGTTGTG--CCTGTGT
BALB_C-Thymus-1	157529	TRBV24-01	39	GACTCAGCACTGTAGCTCTGTGCCAGCAGTCTG--CCCCAGGT--ACAGGTATGGGGGCTCCATTTCTGACTGGAGGGGTTGTG--CCTGTGT
C57BL_6-Thymus-2	168973	TRBV24-01	39	CGACTCAGCACTGTAGCTCTGTGCCAGCAGTCTG--CCAGGGT--ACAGGTATGGGGGCTCCATTTCTGACTGGAGGGGTTGTG--CCTGTGT
C57BL_6-Thymus-2	89659	TRBV24-01	39	AGACGACTCAGCACTGTAGCTCTGTGCCAGCAGTCT--CGGTT--ACAGGTATGGGGGCTCCATTTCTGACTGGAGGGGTTGTG--CCTGTGT
BALB_C-Thymus-1	97919	TRBV24-01	39	ACGACTCAGCACTGTAGCTCTGTGCCAGCAGTCTGT--CGGAT--ACAGGTATGGGGGCTCCATTTCTGACTGGAGGGGTTGTG--CCTGTGT
C57BL_6-Thymus-2	216870	TRBV24-01	39	GACGACTCAGCACTGTAGCTCTGTGCCAGCAGTCTGT--GGGT--ACAGGTATGGGGGCTCCATTTCTGACTGGAGGGGTTGTG--CCTGTGT
BALB_C-Thymus-1	273329	TRBV24-01	39	AAGAAGACGACTCAGCACTGTAGCTCTGTGCCAGCAGTCG--C--ACAGGTATGGGGGCTCCATTTCTGACTGGAGGGGTTGTG--CCTGTGT
BALB_C-Thymus-1	87680	TRBV24-01	39	CAGCACTGTAGCTCTGTGCCAGCAGTCTG--GCCCCACAGGGG--ACAGGTATGGGGGCTCCATTTCTGACTGGAGGGGTTGTG--CCTGTGT
BALB_C-Thymus-2	44658	TRBV24-01	39	TGTAGCTCTGTGCCAGCAGTCTGT--CGTCCCGGGACAGGGGT--ACAGGTATGGGGGCTCCATTTCTGACTGGAGGGGTTGTG--CCTGTGT
BALB_C-Thymus-1	294750	TRBV24-01	39	GCACTGTAGCTCTGTGCCAGCAGTCTGTA--TCGGCAGGGGTT--ACAGGTATGGGGGCTCCATTTCTGACTGGAGGGGTTGTG--CCTGTGT
C57BL_6-Thymus-1	262577	TRBV24-01	39	ACTCAGCACTGTAGCTCTGTGCCAGCAGT--ACCACAGGGGTC--ACAGGTATGGGGGCTCCATTTCTGACTGGAGGGGTTGTG--CCTGTGT
BALB_C-Spleen-2	24618	TRBV24-01	39	AGACGACTCAGCACTGTAGCTCTGTGCCAGCAGTC--CGGGAC--ACAGGTATGGGGGCTCCATTTCTGACTGGAGGGGTTGTG--CCTGTGT
C57BL_6-Thymus-1	245112	TRBV24-01	39	GACGACTCAGCACTGTAGCTCTGTGCCAGCAGTCTGT--CGGG--ACAGGTATGGGGGCTCCATTTCTGACTGGAGGGGTTGTG--CCTGTGT
BALB_C-Spleen-1	34549	TRBV23-01	39	AGAAGACTCAGCACTGTACTTGTGCTCCAGCAGTCAA--GAGT--ACAGGTATGGGGGCTCCATTTCTGACTGGAGGGGTTGTG--CCTGTGT
BALB_C-Thymus-2	84072	TRBV22-01	39	GGAGACTCAGTGTTATACCTCTGTGCCAGCAGT--CAGGGGGT--ACAGGTATGGGGGCTCCATTTCTGACTGGAGGGGTTGTG--CCTGTGT
C57BL_6-Thymus-2	258944	TRBV21-01	39	TAACAGATTCAGCTGTGTACTTCTGTGCTAGCAG--GCGACAA--ACAGGTATGGGGGCTCCATTTCTGACTGGAGGGGTTGTG--CCTGTGT
C57BL_6-Thymus-2	259436	TRBV20-01	39	TATCTTGAAGACAGAGGCTTATATCTCTGTGGTG--TAGGCCA--ACAGGTATGGGGGCTCCATTTCTGACTGGAGGGGTTGTG--CCTGTGT
BALB_C-Thymus-1	126607	TRBV20-01	39	TTGAAGACAGAGGCTTATATCTCTGTGGTGCTAG--TTACAAT--ACAGGTATGGGGGCTCCATTTCTGACTGGAGGGGTTGTG--CCTGTGT
BALB_C-Thymus-1	212638	TRBV20-01	39	TGAAGACAGAGGCTTATATCTCTGTGGTGCTAGGG--CAGGTC--ACAGGTATGGGGGCTCCATTTCTGACTGGAGGGGTTGTG--CCTGTGT
C57BL_6-Thymus-1	319177	TRBV20-01	39	GAAGACAGAGGCTTATATCTCTGTGGTGCTAGGG--GGCAGGG--ACAGGTATGGGGGCTCCATTTCTGACTGGAGGGGTTGTG--CCTGTGT
BALB_C-Spleen-2	68774	TRBV20-01	39	TGAAGACAGAGGCTTATATCTCTGTGGTGCTAGGG--TAGGGG--ACAGGTATGGGGGCTCCATTTCTGACTGGAGGGGTTGTG--CCTGTGT
BALB_C-Thymus-1	221921	TRBV20-01	39	ATATCTTGAAGACAGAGGCTTATATCTCTGTGG--GGGGGCGT--ACAGGTATGGGGGCTCCATTTCTGACTGGAGGGGTTGTG--CCTGTGT
C57BL_6-Thymus-1	245497	TRBV19-01	39	GAGATGGCCGTTTTTCTCTGTGCCAGCAGTAT--CAGGGCAGT--ACAGGTATGGGGGCTCCATTTCTGACTGGAGGGGTTGTG--CCTGTGT
BALB_C-Thymus-1	34492	TRBV19-01	39	GATGGCCGTTTTTCTCTGTGCCAGCAGTATAG--ACACAGGAT--ACAGGTATGGGGGCTCCATTTCTGACTGGAGGGGTTGTG--CCTGTGT
BALB_C-Thymus-2	30995	TRBV19-01	39	GAGATGGCCGTTTTTCTCTGTGCCAGCAGTATA--AACGGAGT--ACAGGTATGGGGGCTCCATTTCTGACTGGAGGGGTTGTG--CCTGTGT
BALB_C-Spleen-1	41746	TRBV19-01	39	AGATGGCCGTTTTTCTCTGTGCCAGCAGTATAG--ACCGGCGT--ACAGGTATGGGGGCTCCATTTCTGACTGGAGGGGTTGTG--CCTGTGT
BALB_C-Thymus-1	273063	TRBV19-01	39	AACGAGATGGCCGTTTTTCTCTGTGCCAGCAGT--AAGACAGT--ACAGGTATGGGGGCTCCATTTCTGACTGGAGGGGTTGTG--CCTGTGT
BALB_C-Thymus-1	73043	TRBV19-01	39	AACGAGATGGCCGTTTTTCTCTGTGCCAGCAGTAT--TCACAA--ACAGGTATGGGGGCTCCATTTCTGACTGGAGGGGTTGTG--CCTGTGT
C57BL_6-Thymus-1	298739	TRBV19-01	39	AGAACGAGATGGCCGTTTTTCTCTGTGCCAGCAGTATA--AGT--ACAGGTATGGGGGCTCCATTTCTGACTGGAGGGGTTGTG--CCTGTGT
C57BL_6-Thymus-2	89617	TRBV19-01	39	AGAACGAGATGGCCGTTTTTCTCTGTGCCAGCAG--CCCGGGG--ACAGGTATGGGGGCTCCATTTCTGACTGGAGGGGTTGTG--CCTGTGT
BALB_C-Spleen-2	60620	TRBV19-01	39	GAGATGGCCGTTTTTCTCTGTGCCAGCAGT--CCCCGGGACAA--ACAGGTATGGGGGCTCCATTTCTGACTGGAGGGGTTGTG--CCTGTGT
BALB_C-Thymus-1	273065	TRBV19-01	39	AACGAGATGGCCGTTTTTCTCTGTGCCAGCAGTATA--AACAG--ACAGGTATGGGGGCTCCATTTCTGACTGGAGGGGTTGTG--CCTGTGT
BALB_C-Thymus-2	131997	TRBV19-01	39	CGAGATGGCCGTTTTTCTCTGTGCCAGCAGTATA--CCCGGGG--ACAGGTATGGGGGCTCCATTTCTGACTGGAGGGGTTGTG--CCTGTGT
BALB_C-Thymus-1	243472	TRBV19-01	39	TGGCCGTTTTTCTCTGTGCCAGCAGT--CGGACAGGGGAAGGT--ACAGGTATGGGGGCTCCATTTCTGACTGGAGGGGTTGTG--CCTGTGT
C57BL_6-Thymus-2	93362	TRBV19-01	39	CGAGATGGCCGTTTTTCTCTGTGCCAGCAGTATA--ACAGGGT--ACAGGTATGGGGGCTCCATTTCTGACTGGAGGGGTTGTG--CCTGTGT
C57BL_6-Thymus-2	108798	TRBV17-01	39	AGAGTATTCTGCCATGTACCTCTGTGCTAGCAGTAGA--ACAG--ACAGGTATGGGGGCTCCATTTCTGACTGGAGGGGTTGTG--CCTGTGT
BALB_C-Thymus-1	92345	TRBV17-01	39	GCCATGTACCTCTGTGCTAGCAGTAGAGA--TCGGGACAGGGG--ACAGGTATGGGGGCTCCATTTCTGACTGGAGGGGTTGTG--CCTGTGT
BALB_C-Thymus-2	241963	TRBV17-01	39	AGTATTCTGCCATGTACCTCTGTGCTAGCAG--GGACAGGGGA--ACAGGTATGGGGGCTCCATTTCTGACTGGAGGGGTTGTG--CCTGTGT
C57BL_6-Thymus-1	29729	TRBV16-01	39	GACTCAGCGGTGTATCTTTGTGCAAGCAGC--CCAGGACAAGT--ACAGGTATGGGGGCTCCATTTCTGACTGGAGGGGTTGTG--CCTGTGT
C57BL_6-Thymus-2	92267	TRBV16-01	39	CAGGACTCAGCGGTGTATCTTTGTGCAAGCAGC--GCGGGGAT--ACAGGTATGGGGGCTCCATTTCTGACTGGAGGGGTTGTG--CCTGTGT
C57BL_6-Thymus-2	309056	TRBV16-01	39	TAGGACTCAGCGGTGTATCTTTGTGCAAGCAGC--GCGGGGAT--ACAGGTATGGGGGCTCCATTTCTGACTGGAGGGGTTGTG--CCTGTGT
BALB_C-Thymus-1	197633	TRBV16-01	39	CAGGACTCAGCGGTGTATCTTTGTGCAAGCAGCT--GGCAGGT--ACAGGTATGGGGGCTCCATTTCTGACTGGAGGGGTTGTG--CCTGTGT
C57BL_6-Thymus-2	236647	TRBV16-01	39	ACTCAGCGGTGTATCTTTGTGCAAGCAGCTTAGA--AGGGAGT--ACAGGTATGGGGGCTCCATTTCTGACTGGAGGGGTTGTG--CCTGTGT
C57BL_6-Thymus-2	75881	TRBV16-01	39	CCCAGGACTCAGCGGTGTATCTTTGTGCAAGCAGC--CCCCGT--ACAGGTATGGGGGCTCCATTTCTGACTGGAGGGGTTGTG--CCTGTGT
BALB_C-Thymus-2	154853	TRBV16-01	39	CAGGACTCAGCGGTGTATCTTTGTGCAAGCAGCTTAG--GCAA--ACAGGTATGGGGGCTCCATTTCTGACTGGAGGGGTTGTG--CCTGTGT
BALB_C-Thymus-2	139105	TRBV16-01	39	GGACTCAGCGGTGTATCTTTGTGCAAGCAGC--CTCTGACAGG--ACAGGTATGGGGGCTCCATTTCTGACTGGAGGGGTTGTG--CCTGTGT
BALB_C-Spleen-2	13729	TRBV16-01	39	ACTCAGCGGTGTATCTTTGTGCAAGCAGCTT--GTCCGGGACA--ACAGGTATGGGGGCTCCATTTCTGACTGGAGGGGTTGTG--CCTGTGT
BALB_C-Thymus-2	164348	TRBV16-01	39	GCGGTGTATCTTTGTGCAAGCAGCT--CCTGGGACAGGGATGT--ACAGGTATGGGGGCTCCATTTCTGACTGGAGGGGTTGTG--CCTGTGT
C57BL_6-Thymus-1	321433	TRBV16-01	39	GGACTCAGCGGTGTATCTTTGTGCAAGCAG--AGGGACAGGGT--ACAGGTATGGGGGCTCCATTTCTGACTGGAGGGGTTGTG--CCTGTGT
C57BL_6-Thymus-1	24580	TRBV16-01	39	GACTCAGCGGTGTATCTTTGTGCAAGCAGCTTAG--GGACAGG--ACAGGTATGGGGGCTCCATTTCTGACTGGAGGGGTTGTG--CCTGTGT
BALB_C-Thymus-1	224299	TRBV15-01	39	CAAGGACTCAGCTGTGTATCTGTGTGCCAGC--AAACATCGTT--ACAGGTATGGGGGCTCCATTTCTGACTGGAGGGGTTGTG--CCTGTGT
C57BL_6-Thymus-2	99201	TRBV15-01	39	GGACTCAGCTGTGTATCTGTGTGCCAGCAGTTTA--ATGGGGT--ACAGGTATGGGGGCTCCATTTCTGACTGGAGGGGTTGTG--CCTGTGT
BALB_C-Thymus-1	91809	TRBV15-01	39	GACTCAGCTGTGTATCTGTGTGCCAGCAGTT--GTTTAGGGGG--ACAGGTATGGGGGCTCCATTTCTGACTGGAGGGGTTGTG--CCTGTGT
BALB_C-Thymus-2	162990	TRBV15-01	39	GAACCCAAGGACTCAGCTGTGTATCTGTGTGCCAGCAGTTT--ACAGGTATGGGGGCTCCATTTCTGACTGGAGGGGTTGTG--CCTGTGT
BALB_C-Spleen-1	37747	TRBV15-01	39	AAGGACTCAGCTGTGTATCTGTGTGCCAGCAGT--GACAGGGG--ACAGGTATGGGGGCTCCATTTCTGACTGGAGGGGTTGTG--CCTGTGT
C57BL_6-Thymus-2	258609	TRBV15-01	39	GGACTCAGCTGTGTATCTGTGTGCCAGCAGTTT--TGACAGGG--ACAGGTATGGGGGCTCCATTTCTGACTGGAGGGGTTGTG--CCTGTGT
BALB_C-Spleen-2	43617	TRBV15-01	39	AAGGACTCAGCTGTGTATCTGTGTGCCAGCAG--ATACAGGGC--ACAGGTATGGGGGCTCCATTTCTGACTGGAGGGGTTGTG--CCTGTGT
BALB_C-Thymus-1	221477	TRBV15-01	39	AGGACTCAGCTGTGTATCTGTGTGCCAGCAG--CCGGACAGGC--ACAGGTATGGGGGCTCCATTTCTGACTGGAGGGGTTGTG--CCTGTGT
C57BL_6-Thymus-2	114326	TRBV15-01	39	CTCAGCTGTGTATCTGTGTGCCAGCAGTT--CCGGGACAGGGA--ACAGGTATGGGGGCTCCATTTCTGACTGGAGGGGTTGTG--CCTGTGT
BALB_C-Thymus-1	194577	TRBV15-01	39	AGGACTCAGCTGTGTATCTGTGTGCCAGCAGTTTAG--GAGGG--ACAGGTATGGGGGCTCCATTTCTGACTGGAGGGGTTGTG--CCTGTGT
C57BL_6-Thymus-2	310436	TRBV15-01	39	TCAGCTGTGTATCTGTGTGCCAGCAGTT--CGGGACAGAAGGT--ACAGGTATGGGGGCTCCATTTCTGACTGGAGGGGTTGTG--CCTGTGT
BALB_C-Spleen-1	13208	TRBV15-01	39	ACTCAGCTGTGTATCTGTGTGCCAGCAGTT--CGGGACAGGGG--ACAGGTATGGGGGCTCCATTTCTGACTGGAGGGGTTGTG--CCTGTGT
BALB_C-Thymus-2	67380	TRBV15-01	39	CCAAGGACTCAGCTGTGTATCTGTGTGCCAGCAGT--GGGACA--ACAGGTATGGGGGCTCCATTTCTGACTGGAGGGGTTGTG--CCTGTGT
BALB_C-Spleen-2	53540	TRBV14-01	39	CGACACAGCCACCTATCTCTGTGCCAGCAGT--CCTACAGGCT--ACAGGTATGGGGGCTCCATTTCTGACTGGAGGGGTTGTG--CCTGTGT
C57BL_6-Thymus-1	211859	TRBV14-01	39	GGCGACACAGCCACCTATCTCTGTGCCAGCAGT--CTGACCCA--ACAGGTATGGGGGCTCCATTTCTGACTGGAGGGGTTGTG--CCTGTGT
C57BL_6-Thymus-1	116688	TRBV14-01	39	AAAGCAGGGCGACACAGCCACCTATCTCTGTGCCAGCAG--GA--ACAGGTATGGGGGCTCCATTTCTGACTGGAGGGGTTGTG--CCTGTGT
C57BL_6-Thymus-2	145726	TRBV14-01	39	GACACAGCCACCTATCTCTGTGCCAGC--GGAGCCTACAGGGA--ACAGGTATGGGGGCTCCATTTCTGACTGGAGGGGTTGTG--CCTGTGT
C57BL_6-Thymus-1	191854	TRBV14-01	39	AAGCAGGGCGACACAGCCACCTATCTCTGTGCCAGC--CGGGG--ACAGGTATGGGGGCTCCATTTCTGACTGGAGGGGTTGTG--CCTGTGT
BALB_C-Thymus-1	226434	TRBV13-03	39	CCCTTTCTCAGACAGCTGTATATTTCTGTGCC--GCGGTGATT--ACAGGTATGGGGGCTCCATTTCTGACTGGAGGGGTTGTG--CCTGTGT
BALB_C-Thymus-1	237410	TRBV13-03	39	TCAGACAGCTGTATATTTCTGTGCCAGCAGTGATG--CTAGGC--ACAGGTATGGGGGCTCCATTTCTGACTGGAGGGGTTGTG--CCTGTGT
BALB_C-Thymus-2	84603	TRBV13-03	39	TCAGACAGCTGTATATTTCTGTGCCAGCAGTGATG--GACAAA--ACAGGTATGGGGGCTCCATTTCTGACTGGAGGGGTTGTG--CCTGTGT
BALB_C-Thymus-2	11143	TRBV13-03	39	TCAGACAGCTGTATATTTCTGTGCCAGCA--CCCCCTTCAGGG--ACAGGTATGGGGGCTCCATTTCTGACTGGAGGGGTTGTG--CCTGTGT
BALB_C-Thymus-2	61565	TRBV13-03	39	TCTCAGACAGCTGTATATTTCTGTGCCAGCAGTGAT--TGGGG--ACAGGTATGGGGGCTCCATTTCTGACTGGAGGGGTTGTG--CCTGTGT
BALB_C-Thymus-1	195047	TRBV13-02	39	ATCAGTGTACTTCTGTGCCAGCGGTGATG--CAAGCCAGGGCA--ACAGGTATGGGGGCTCCATTTCTGACTGGAGGGGTTGTG--CCTGTGT
C57BL_6-Thymus-2	139745	TRBV13-02	39	CTCAGACATCAGTGTACTTCTGTGCCAGCGGT--CCCGACAGT--ACAGGTATGGGGGCTCCATTTCTGACTGGAGGGGTTGTG--CCTGTGT
BALB_C-Thymus-2	132929	TRBV13-02	39	CTCAGACATCAGTGTACTTCTGTGCCAGCGGTGAT--TGCAGT--ACAGGTATGGGGGCTCCATTTCTGACTGGAGGGGTTGTG--CCTGTGT
C57BL_6-Thymus-1	102500	TRBV13-02	39	CAGACATCAGTGTACTTCTGTGCCAGCGGTGATG--TTCCCAG--ACAGGTATGGGGGCTCCATTTCTGACTGGAGGGGTTGTG--CCTGTGT
BALB_C-Spleen-1	30189	TRBV13-02	39	TCTCAGACATCAGTGTACTTCTGTGCCAGCGG--CCCCGGGAC--ACAGGTATGGGGGCTCCATTTCTGACTGGAGGGGTTGTG--CCTGTGT
BALB_C-Thymus-1	149052	TRBV13-02	39	ATCAGTGTACTTCTGTGCCAGCGGTGATG--CTCCGGGACAGT--ACAGGTATGGGGGCTCCATTTCTGACTGGAGGGGTTGTG--CCTGTGT
BALB_C-Thymus-1	57095	TRBV13-02	39	CAGACATCAGTGTACTTCTGTGCCAGCGGTGATG--ACAGGGG--ACAGGTATGGGGGCTCCATTTCTGACTGGAGGGGTTGTG--CCTGTGT
C57BL_6-Thymus-1	34020	TRBV13-02	39	CATCAGTGTACTTCTGTGCCAGCGGTGATG--AGGACAGGGTA--ACAGGTATGGGGGCTCCATTTCTGACTGGAGGGGTTGTG--CCTGTGT
BALB_C-Thymus-1	39172	TRBV13-02	39	GACATCAGTGTACTTCTGTGCCAGCGGTGATG--CGGACAGGC--ACAGGTATGGGGGCTCCATTTCTGACTGGAGGGGTTGTG--CCTGTGT
BALB_C-Thymus-2	253799	TRBV13-02	39	CTCTCAGACATCAGTGTACTTCTGTGCCAGCGGTG--GGACAG ACAGGTATGGGGGCTCCATTTCTGACTGGAGGGGTTGTG--CCTGTGT
C57BL_6-Thymus-1	132332	TRBV13-02	39	TCTCAGACATCAGTGTACTTCTGTGCCAGCGGTGAG--GGACA--ACAGGTATGGGGGCTCCATTTCTGACTGGAGGGGTTGTG--CCTGTGT
C57BL_6-Thymus-1	87001	TRBV13-01	39	CATCTTTGTACTTCTGTGCCAGCAGTGA--CACGACAGAGAGT--ACAGGTATGGGGGCTCCATTTCTGACTGGAGGGGTTGTG--CCTGTGT
BALB_C-Thymus-1	105915	TRBV13-01	39	TCAGACATCTTTGTACTTCTGTGCCAGCAG--ACCTGACTCCA--ACAGGTATGGGGGCTCCATTTCTGACTGGAGGGGTTGTG--CCTGTGT
BALB_C-Thymus-1	266664	TRBV13-01	39	TCTCAGACATCTTTGTACTTCTGTGCCAGCAGTG--CGACAGT--ACAGGTATGGGGGCTCCATTTCTGACTGGAGGGGTTGTG--CCTGTGT
BALB_C-Thymus-2	43790	TRBV13-01	39	TCCCTCTCAGACATCTTTGTACTTCTGTGCCAGCAG--AGGAC--ACAGGTATGGGGGCTCCATTTCTGACTGGAGGGGTTGTG--CCTGTGT
BALB_C-Thymus-1	197366	TRBV13-01	39	CAGACATCTTTGTACTTCTGTGCCAGCAGTG--CCAGGGACAG--ACAGGTATGGGGGCTCCATTTCTGACTGGAGGGGTTGTG--CCTGTGT
C57BL_6-Thymus-2	219846	TRBV13-01	39	TCAGACATCTTTGTACTTCTGTGCCAGCAGTGATG--CCCGGG--ACAGGTATGGGGGCTCCATTTCTGACTGGAGGGGTTGTG--CCTGTGT
BALB_C-Thymus-1	239156	TRBV13-01	39	TCCCTCTCAGACATCTTTGTACTTCTGTGCC--CCAGGGGGGT--ACAGGTATGGGGGCTCCATTTCTGACTGGAGGGGTTGTG--CCTGTGT
BALB_C-Thymus-2	132930	TRBV13-01	39	CTCAGACATCTTTGTACTTCTGTGCCAGCAG--GGGGACAGGT--ACAGGTATGGGGGCTCCATTTCTGACTGGAGGGGTTGTG--CCTGTGT
C57BL_6-Thymus-2	90026	TRBV12-02	39	AGGACTCTGCCGTGTACTTCTGTGCCAGCTC--CCGAGGCCGT--ACAGGTATGGGGGCTCCATTTCTGACTGGAGGGGTTGTG--CCTGTGT
C57BL_6-Thymus-2	256819	TRBV12-02	39	GACTCTGCCGTGTACTTCTGTGCCAGCTCTCT--GACGACAAT--ACAGGTATGGGGGCTCCATTTCTGACTGGAGGGGTTGTG--CCTGTGT
BALB_C-Thymus-1	157531	TRBV12-02	39	GACTCTGCCGTGTACTTCTGTGCCAGCTCTCTC--GGACTCCA--ACAGGTATGGGGGCTCCATTTCTGACTGGAGGGGTTGTG--CCTGTGT
BALB_C-Thymus-1	129445	TRBV12-02	39	ACTCTGCCGTGTACTTCTGTGCCAGCTCTCTC--GAACAGGGG--ACAGGTATGGGGGCTCCATTTCTGACTGGAGGGGTTGTG--CCTGTGT
BALB_C-Spleen-2	71423	TRBV12-01	39	GGACTCTGCTATGTACTTCTGTGCCAGCTCTC--CCGGGCCGA--ACAGGTATGGGGGCTCCATTTCTGACTGGAGGGGTTGTG--CCTGTGT
C57BL_6-Thymus-1	280375	TRBV12-01	39	GAGGACTCTGCTATGTACTTCTGTGCCAGCTCT--TAGGGTTT--ACAGGTATGGGGGCTCCATTTCTGACTGGAGGGGTTGTG--CCTGTGT
BALB_C-Thymus-1	79682	TRBV12-01	39	GACTCTGCTATGTACTTCTGTGCCAGCTCTCTC--GATCCAGT--ACAGGTATGGGGGCTCCATTTCTGACTGGAGGGGTTGTG--CCTGTGT
C57BL_6-Thymus-1	53117	TRBV12-01	39	GGAGGACTCTGCTATGTACTTCTGTGCCAGCTCTC--AGGGGA--ACAGGTATGGGGGCTCCATTTCTGACTGGAGGGGTTGTG--CCTGTGT
BALB_C-Thymus-1	263161	TRBV12-01	39	GAGGACTCTGCTATGTACTTCTGTGCCAGC--CCACCTGGGGG--ACAGGTATGGGGGCTCCATTTCTGACTGGAGGGGTTGTG--CCTGTGT
BALB_C-Spleen-1	17474	TRBV12-01	39	GAGGACTCTGCTATGTACTTCTGTGCCAGCTC--GAGAGACAG--ACAGGTATGGGGGCTCCATTTCTGACTGGAGGGGTTGTG--CCTGTGT
BALB_C-Thymus-1	276724	TRBV12-01	39	ACTCTGCTATGTACTTCTGTGCCAGCTCTC--CCCCGGGACAA--ACAGGTATGGGGGCTCCATTTCTGACTGGAGGGGTTGTG--CCTGTGT
BALB_C-Spleen-2	83621	TRBV12-01	39	ACTCTGCTATGTACTTCTGTGCCAGCTCTCTC--TCGGGACAG--ACAGGTATGGGGGCTCCATTTCTGACTGGAGGGGTTGTG--CCTGTGT
C57BL_6-Spleen-1	23078	TRBV12-01	39	GACTCTGCTATGTACTTCTGTGCCAGCTCTCTC--GGGGACAC--ACAGGTATGGGGGCTCCATTTCTGACTGGAGGGGTTGTG--CCTGTGT
C57BL_6-Thymus-1	276053	TRBV12-01	39	CTGCTATGTACTTCTGTGCCAGCTCTCTC--ACAGGGAGCGAC--ACAGGTATGGGGGCTCCATTTCTGACTGGAGGGGTTGTG--CCTGTGT
C57BL_6-Thymus-1	315154	TRBV12-01	39	CTGCTATGTACTTCTGTGCCAGCTCTCTC--ACAGGGGGCGAC--ACAGGTATGGGGGCTCCATTTCTGACTGGAGGGGTTGTG--CCTGTGT
C57BL_6-Thymus-2	279790	TRBV05-01	39	AGACTCAGCTGTCTATTTTTGTGCCAGCAGCC--CTCGCCAAT--ACAGGTATGGGGGCTCCATTTCTGACTGGAGGGGTTGTG--CCTGTGT
C57BL_6-Spleen-2	28032	TRBV05-01	39	AGAAGACTCAGCTGTCTATTTTTGTGCCAGCAGCCA--GACAA--ACAGGTATGGGGGCTCCATTTCTGACTGGAGGGGTTGTG--CCTGTGT
C57BL_6-Thymus-1	293777	TRBV05-01	39	AAGACTCAGCTGTCTATTTTTGTGCCAGCAGCCAAG--GAGGT--ACAGGTATGGGGGCTCCATTTCTGACTGGAGGGGTTGTG--CCTGTGT
C57BL_6-Thymus-2	238552	TRBV05-01	39	AGACTCAGCTGTCTATTTTTGTGCCAGCAGCC--CCACAGGGG ACAGGTATGGGGGCTCCATTTCTGACTGGAGGGGTTGTG--CCTGTGT
BALB_C-Thymus-2	251367	TRBV05-01	39	CTCAGCTGTCTATTTTTGTGCCAGCAGCC--CTTTTGGACAGT--ACAGGTATGGGGGCTCCATTTCTGACTGGAGGGGTTGTG--CCTGTGT
BALB_C-Thymus-1	221113	TRBV05-01	39	AGACTCAGCTGTCTATTTTTGTGCCAGCAGCCAAG--TGACAG--ACAGGTATGGGGGCTCCATTTCTGACTGGAGGGGTTGTG--CCTGTGT
C57BL_6-Thymus-2	256818	TRBV05-01	39	GACTCAGCTGTCTATTTTTGTGCCAGCAGCCA--AGATGCCAG--ACAGGTATGGGGGCTCCATTTCTGACTGGAGGGGTTGTG--CCTGTGT
C57BL_6-Thymus-2	238457	TRBV05-01	39	AGAAGACTCAGCTGTCTATTTTTGTGCCAGCAGCCA--GCCAG--ACAGGTATGGGGGCTCCATTTCTGACTGGAGGGGTTGTG--CCTGTGT
C57BL_6-Spleen-2	22041	TRBV05-01	39	ACTCAGCTGTCTATTTTTGTGCCAGCAGCC--CCGGGACAAGT--ACAGGTATGGGGGCTCCATTTCTGACTGGAGGGGTTGTG--CCTGTGT
C57BL_6-Thymus-1	163936	TRBV05-01	39	ACTCAGCTGTCTATTTTTGTGCCAGCAGCCAA--TCGGGACAA--ACAGGTATGGGGGCTCCATTTCTGACTGGAGGGGTTGTG--CCTGTGT
C57BL_6-Thymus-2	310435	TRBV05-01	39	TCAGCTGTCTATTTTTGTGCCAGCAGCCA--AGAATGGGACAA--ACAGGTATGGGGGCTCCATTTCTGACTGGAGGGGTTGTG--CCTGTGT
BALB_C-Thymus-1	112958	TRBV05-01	39	AGCTGTCTATTTTTGTGCCAGCAGCCAAGA--CAGGGGACCCA--ACAGGTATGGGGGCTCCATTTCTGACTGGAGGGGTTGTG--CCTGTGT
BALB_C-Thymus-1	276726	TRBV04-01	39	ACTCTGCTGTGTATCTCTGTGCCAGCAGCT--CTCCACAGAGT--ACAGGTATGGGGGCTCCATTTCTGACTGGAGGGGTTGTG--CCTGTGT
BALB_C-Thymus-1	121108	TRBV04-01	39	GGACTCTGCTGTGTATCTCTGTGCCAGCAGC--CGGGACTCCA--ACAGGTATGGGGGCTCCATTTCTGACTGGAGGGGTTGTG--CCTGTGT
BALB_C-Thymus-1	294542	TRBV04-01	39	GAGGACTCTGCTGTGTATCTCTGTGCCAGCAG--TTCAGGGTT--ACAGGTATGGGGGCTCCATTTCTGACTGGAGGGGTTGTG--CCTGTGT
BALB_C-Spleen-1	15613	TRBV04-01	39	GAGGACTCTGCTGTGTATCTCTGTGCCAGCAGC--CACAGGAT--ACAGGTATGGGGGCTCCATTTCTGACTGGAGGGGTTGTG--CCTGTGT
BALB_C-Thymus-1	92156	TRBV04-01	39	GAGGACTCTGCTGTGTATCTCTGTGCCAGCAGC--GCACAGGC--ACAGGTATGGGGGCTCCATTTCTGACTGGAGGGGTTGTG--CCTGTGT
BALB_C-Thymus-1	98533	TRBV04-01	39	ACTCTGCTGTGTATCTCTGTGCCAGCAGCTAAGA--ACGGCAA--ACAGGTATGGGGGCTCCATTTCTGACTGGAGGGGTTGTG--CCTGTGT
BALB_C-Thymus-1	276725	TRBV04-01	39	ACTCTGCTGTGTATCTCTGTGCCAGCAGCTAA--GAACGGCAA--ACAGGTATGGGGGCCCCATTTCTGACTGGAGGGGTTGTG--CCTGTGT
C57BL_6-Thymus-1	228522	TRBV04-01	39	AGGACTCTGCTGTGTATCTCTGTGCCAGCAGCTAA--TCTGGA--ACAGGTATGGGGGCTCCATTTCTGACTGGAGGGGTTGTG--CCTGTGT
C57BL_6-Thymus-1	109657	TRBV04-01	39	GGACTCTGCTGTGTATCTCTGTGCCAGCAGCTAAGA--GTAGA--ACAGGTATGGGGGCTCCATTTCTGACTGGAGGGGTTGTG--CCTGTGT
BALB_C-Thymus-1	284299	TRBV04-01	39	CGGAGGACTCTGCTGTGTATCTCTGTGCCAGCAGCTA--GGGA--ACAGGTATGGGGGCTCCATTTCTGACTGGAGGGGTTGTG--CCTGTGT
C57BL_6-Thymus-2	239263	TRBV04-01	39	AGGACTCTGCTGTGTATCTCTGTGCCAGCAGCTAAGA--ACAA--ACAGGTATGGGGGCTCCATTTCTGACTGGAGGGGTTGTG--CCTGTGT
C57BL_6-Thymus-1	297973	TRBV04-01	39	ACTCTGCTGTGTATCTCTGTGCCAGCAGCTAA--CACAGGGGG--ACAGGTATGGGGGCTCCATTTCTGACTGGAGGGGTTGTG--CCTGTGT
C57BL_6-Thymus-2	143684	TRBV04-01	39	CTGTGTATCTCTGTGCCAGCAGCTAAGA--ATAGGGCAGGGGT--ACAGGTATGGGGGCTCCATTTCTGACTGGAGGGGTTGTG--CCTGTGT
BALB_C-Thymus-2	43131	TRBV04-01	39	GGACTCTGCTGTGTATCTCTGTGCCAGCAGC--CCGGGACAGT--ACAGGTATGGGGGCTCCATTTCTGACTGGAGGGGTTGTG--CCTGTGT
C57BL_6-Spleen-2	35855	TRBV04-01	39	GAGGACTCTGCTGTGTATCTCTGTGCCAGCAGC--GGGACAGA--ACAGGTATGGGGGCTCCATTTCTGACTGGAGGGGTTGTG--CCTGTGT
BALB_C-Thymus-2	83701	TRBV03-01	39	GAGGACTCAGCTGTGTACTTCTGTGCCAGCAG--GGACATCGT--ACAGGTATGGGGGCTCCATTTCTGACTGGAGGGGTTGTG--CCTGTGT
BALB_C-Thymus-1	286257	TRBV03-01	39	CTCAGCTGTGTACTTCTGTGCCAGCAGCTTAGA--CGACAAGT--ACAGGTATGGGGGCTCCATTTCTGACTGGAGGGGTTGTG--CCTGTGT
C57BL_6-Thymus-1	321470	TRBV03-01	39	GGAGGACTCAGCTGTGTACTTCTGTGCCAGCAGC--CGACAGA--ACAGGTATGGGGGCTCCATTTCTGACTGGAGGGGTTGTG--CCTGTGT
C57BL_6-Thymus-2	293523	TRBV03-01	39	CTCAGCTGTGTACTTCTGTGCCAGCAGCTT--GGCCCGACAGG--ACAGGTATGGGGGCTCCATTTCTGACTGGAGGGGTTGTG--CCTGTGT
BALB_C-Thymus-1	157530	TRBV03-01	39	GACTCAGCTGTGTACTTCTGTGCCAGCAGCTTA--AACCAGGG--ACAGGTATGGGGGCTCCATTTCTGACTGGAGGGGTTGTG--CCTGTGT
C57BL_6-Thymus-1	262578	TRBV03-01	39	ACTCAGCTGTGTACTTCTGTGCCAGCAGCTTAG--CTCAGGGG--ACAGGTATGGGGGCTCCATTTCTGACTGGAGGGGTTGTG--CCTGTGT
BALB_C-Spleen-2	60746	TRBV03-01	39	GGACTCAGCTGTGTACTTCTGTGCCAGCAGC--ACCGGGACAA--ACAGGTATGGGGGCTCCATTTCTGACTGGAGGGGTTGTG--CCTGTGT
BALB_C-Thymus-1	102004	TRBV03-01	39	CTCAGCTGTGTACTTCTGTGCCAGCAGC--CCGGGACAGGGTA--ACAGGTATGGGGGCTCCATTTCTGACTGGAGGGGTTGTG--CCTGTGT
BALB_C-Thymus-1	219466	TRBV03-01	39	ACTCAGCTGTGTACTTCTGTGCCAGCAGCTT--TACAGGGGGT--ACAGGTATGGGGGCTCCATTTCTGACTGGAGGGGTTGTG--CCTGTGT
BALB_C-Thymus-1	256841	TRBV03-01	39	CTCAGCTGTGTACTTCTGTGCCAGCAGCTTAGA--GGACAGGC--ACAGGTATGGGGGCTCCATTTCTGACTGGAGGGGTTGTG--CCTGTGT
BALB_C-Thymus-1	187191	TRBV03-01	39	TGGAGGACTCAGCTGTGTACTTCTGTGCCAGCAG--GGGACAA--ACAGGTATGGGGGCTCCATTTCTGACTGGAGGGGTTGTG--CCTGTGT
BALB_C-Thymus-1	277920	TRBV03-01	39	AGGACTCAGCTGTGTACTTCTGTGCCAGCAGCTT--GGGACAT--ACAGGTATGGGGGCTCCATTTCTGACTGGAGGGGTTGTG--CCTGTGT
BALB_C-Thymus-1	275427	TRBV02-01	39	ACTCGGCCACATACTTCTGTGCCAGCAGCCAA--CGAAGTCCA--ACAGGTATGGGGGCTCCATTTCTGACTGGAGGGGTTGTG--CCTGTGT
BALB_C-Thymus-1	146331	TRBV02-01	39	AAGCCTGATGACTCGGCCACATACTTCTGTGCCAGC--CGGGC--ACAGGTATGGGGGCTCCATTTCTGACTGGAGGGGTTGTG--CCTGTGT
C57BL_6-Thymus-2	56441	TRBV02-01	39	TGACTCGGCCACATACTTCTGTGCCAGCAGCCAAGA--ACCAA--ACAGGTATGGGGGCTCCATTTCTGACTGGAGGGGTTGTG--CCTGTGT
C57BL_6-Thymus-1	302412	TRBV02-01	39	ATGACTCGGCCACATACTTCTGTGCCAGCAGCCAAGA--CGTT--ACAGGTATGGGGGCTCCATTTCTGACTGGAGGGGTTGTG--CCTGTGT
BALB_C-Thymus-2	102474	TRBV02-01	39	TGACTCGGCCACATACTTCTGTGCCAGCAGCCA--TCCAGGGG--ACAGGTATGGGGGCTCCATTTCTGACTGGAGGGGTTGTG--CCTGTGT
BALB_C-Thymus-2	271775	TRBV02-01	39	TGACTCGGCCACATACTTCTGTGCCAGCAGCCAAG--GACAGG--ACAGGTATGGGGGCTCCATTTCTGACTGGAGGGGTTGTG--CCTGTGT
C57BL_6-Thymus-1	88716	TRBV02-01	39	CTCGGCCACATACTTCTGTGCCAGCAGCCAAGA--GGGGACAG--ACAGGTATGGGGGCTCCATTTCTGACTGGAGGGGTTGTG--CCTGTGT
C57BL_6-Spleen-2	31724	TRBV02-01	39	TGATGACTCGGCCACATACTTCTGTGCCAGCAGC--GGGACAG--ACAGGTATGGGGGCTCCATTTCTGACTGGAGGGGTTGTG--CCTGTGT
C57BL_6-Thymus-2	160144	TRBV02-01	39	ACTCGGCCACATACTTCTGTGCCAGCAGCCA--GGGACAGGGG--ACAGGTATGGGGGCTCCATTTCTGACTGGAGGGGTTGTG--CCTGTGT
C57BL_6-Thymus-2	279665	TRBV01-01	39	AGAACCTTGTACTGCACCTGCAGTGCAGA--TGGCGACAGAGA--ACAGGTATGGGGGCTCCATTTCTGACTGGAGGGGTTGTG--CCTGTGT
BALB_C-Thymus-1	80077	TRBV01-01	39	GCAGAACCTTGTACTGCACCTGCAGTGCAGA--GGAGGGATCA--ACAGGTATGGGGGCTCCATTTCTGACTGGAGGGGTTGTG--CCTGTGT
BALB_C-Thymus-2	215790	TRBV01-01	39	CCAGGGCAGAACCTTGTACTGCACCTGCAGTGA--GGGACGGT--ACAGGTATGGGGGCTCCATTTCTGACTGGAGGGGTTGTG--CCTGTGT
C57BL_6-Thymus-2	90197	TRBV01-01	39	AGGGCAGAACCTTGTACTGCACCTGCAGTGCA--ACGCAGATA--ACAGGTATGGGGGCTCCATTTCTGACTGGAGGGGTTGTG--CCTGTGT
C57BL_6-Thymus-2	40709	TRBV01-01	39	CAGGGCAGAACCTTGTACTGCACCTGCAGT--TCCTGGGACAG--ACAGGTATGGGGGCTCCATTTCTGACTGGAGGGGTTGTG--CCTGTGT
BALB_C-Spleen-1	20720	TRBV01-01	39	AGAACCTTGTACTGCACCTGCAGTGCAGA--TGTTGGGACAGT--ACAGGTATGGGGGCTCCATTTCTGACTGGAGGGGTTGTG--CCTGTGT
BALB_C-Thymus-2	211804	TRBV01-01	39	AGGGCAGAACCTTGTACTGCACCTGCAG--AGCGGGACAGGGG--ACAGGTATGGGGGCTCCATTTCTGACTGGAGGGGTTGTG--CCTGTGT
BALB_C-Thymus-1	13773	TRBV31-01	38	TCAGCCACTCTGGCTTCTACCTCTGTGCCTGGAGTCT--AGCCC--CAGGTATGGGGGCTCCATTTCTGACTGGAGGGGTTGTG--CCTGTGT
C57BL_6-Spleen-1	16786	TRBV31-01	38	CACTCTGGCTTCTACCTCTGTGCCTGGAGTC--CCGGACAGGGC--CAGGTATGGGGGCTCCATTTCTGACTGGAGGGGTTGTG--CCTGTGT
BALB_C-Spleen-2	5408	TRBV31-01	38	CACTCTGGCTTCTACCTCTGTGCCTGGAG--AACAGGGGGCGCT--CAGGTATGGGGGCTCCATTTCTGACTGGAGGGGTTGTG--CCTGTGT
C57BL_6-Thymus-1	133598	TRBV29-01	38	TCTGTGTACTTCTGTGCTAGCAGTTTA--AGGGATGGGCAGGCT--CAGGTATGGGGGCTCCATTTCTGACTGGAGGGGTTGTG--CCTGTGT
C57BL_6-Spleen-2	30462	TRBV29-01	38	CAGACATCTGTGTACTTCTGTGCTAGCAGTTTAT--TGCAGGGC--CAGGTATGGGGGCTCCATTTCTGACTGGAGGGGTTGTG--CCTGTGT
BALB_C-Thymus-2	149633	TRBV29-01	38	ACATCTGTGTACTTCTGTGCTAGCAGT--CCCGGGACAGGGGGG--CAGGTATGGGGGCTCCATTTCTGACTGGAGGGGTTGTG--CCTGTGT
C57BL_6-Thymus-1	304987	TRBV26-01	38	CAGGAGACTCAGCACTGTACCTCTGTGCCAGCAG--CCGCAGGG--CAGGTATGGGGGCTCCATTTCTGACTGGAGGGGTTGTG--CCTGTGT
BALB_C-Thymus-1	120350	TRBV24-01	38	GACTCAGCACTGTAGCTCTGTGCCAGCAGTCTGTA--TTTAGGG--CAGGTATGGGGGCTCCATTTCTGACTGGAGGGGTTGTG--CCTGTGT
BALB_C-Thymus-1	294241	TRBV24-01	38	GACTCAGCACTGTAGCTCTGTGCCAGCAGTCTGTA--TTTAGGG--CAGGTATGGGGGCTCCATTTCTGGCTGGAGGGGTTGTG--CCTGTGT
BALB_C-Thymus-1	262218	TRBV24-01	38	GAAGACGACTCAGCACTGTAGCTCTGTGCCAGCAGTCTGT--TC--CAGGTATGGGGGCTCCATTTCTGACTGGAGGGGTTGTG--CCTGTGT
BALB_C-Thymus-1	275269	TRBV24-01	38	ACGACTCAGCACTGTAGCTCTGTGCCAGCAGTC--CCAGGGGG--CAGGTATGGGGGCTCCATTTCTGACTGGAGGGGTTGTG--CCTGTGT
BALB_C-Thymus-1	34268	TRBV24-01	38	GACGACTCAGCACTGTAGCTCTGTGCCAGCAGTC--CCAGGGGG--CAGGTATGGGGGCTCCATTTCTGACTGGAGGGGTTGTG--CCTGTGT
BALB_C-Thymus-2	60326	TRBV20-01	38	GCATATCTTGAAGACAGAGGCTTATATCTCTGTGGTGC--TTGT--CAGGTATGGGGGCTCCATTTCTGACTGGAGGGGTTGTG--CCTGTGT
BALB_C-Spleen-1	25129	TRBV20-01	38	TTGAAGACAGAGGCTTATATCTCTGTGGTGCTAG--TCAGGGGG--CAGGTATGGGGGCTCCATTTCTGACTGGAGGGGTTGTG--CCTGTGT
C57BL_6-Thymus-1	295480	TRBV20-01	38	ACAGAGGCTTATATCTCTGTGGTGCTAGGG-GGGACAGGGGGG--CAGGTATGGGGGCTCCATTTCTGACTGGAGGGGTTGTG--CCTGTGT
C57BL_6-Spleen-2	54328	TRBV17-01	38	CTGCCATGTACCTCTGTGCTAGCAGTAGAGA--GACAGGGGGGG--CAGGTATGGGGGCTCCATTTCTGACTGGAGGGGTTGTG--CCTGTGT
C57BL_6-Thymus-2	178004	TRBV16-01	38	GACTCAGCGGTGTATCTTTGTGCAAGCAGC--CGGGACAGGGGG--CAGGTATGGGGGCTCCATTTCTGACTGGAGGGGTTGTG--CCTGTGT
BALB_C-Thymus-1	34589	TRBV15-01	38	GGACTCAGCTGTGTATCTGTGTGCCAGCAGT--CCTCCAGGGAC--CAGGTATGGGGGCTCCATTTCTGACTGGAGGGGTTGTG--CCTGTGT
BALB_C-Thymus-1	55652	TRBV15-01	38	ACTCAGCTGTGTATCTGTGTGCCAGCAGT--CCCCTGGACAGGT--CAGGTATGGGGGCTCCATTTCTGACTGGAGGGGTTGTG--CCTGTGT
BALB_C-Thymus-2	99079	TRBV14-01	38	GCAAAGCAGGGCGACACAGCCACCTATCTCTGTGCCA--ATTAC--CAGGTATGGGGGCTCCATTTCTGACTGGAGGGGTTGTG--CCTGTGT
BALB_C-Thymus-2	263704	TRBV13-02	38	TCAGTGTACTTCTGTGCCAGCGGTGAT--TAAGGACAGGGCCTC--CAGGTATGGGGGCTCCATTTCTGACTGGAGGGGTTGTG--CCTGTGT
BALB_C-Thymus-2	156021	TRBV13-02	38	CCTCTCAGACATCAGTGTACTTCTGTGCCAGCGG--AGGACAGG--CAGGTATGGGGGCTCCATTTCTGACTGGAGGGGTTGTG--CCTGTGT
BALB_C-Thymus-1	172569	TRBV13-02	38	CAGACATCAGTGTACTTCTGTGCCAGCGGTGATG--TGGGGGGG--CAGGTATGGGGGCTCCATTTCTGACTGGAGGGGTTGTG--CCTGTGT
C57BL_6-Thymus-1	109704	TRBV13-01	38	GGCTTCTCCCTCTCAGACATCTTTGTACTTCTGTGCC--CGGAT--CAGGTATGGGGGCTCCATTTCTGACTGGAGGGGTTGTG--CCTGTGT
BALB_C-Thymus-1	288381	TRBV13-01	38	CTCTCAGACATCTTTGTACTTCTGTGCCAGCAGTGATG--GAGG--CAGGTATGGGGGCTCCATTTCTGACTGGAGGGGTTGTG--CCTGTGT
BALB_C-Thymus-1	298487	TRBV13-01	38	TCCCTCTCAGACATCTTTGTACTTCTGTGCCAGCAGTGA--CCT--CAGGTATGGGGGCTCCATTTCTGACTGGAGGGGTTGTG--CCTGTGT
BALB_C-Thymus-2	132931	TRBV13-01	38	CTCAGACATCTTTGTACTTCTGTGCCAGCAGT--CCACAGGGGG--CAGGTATGGGGGCTCCATTTCTGACTGGAGGGGTTGTG--CCTGTGT
BALB_C-Thymus-2	209801	TRBV13-01	38	ACATCTTTGTACTTCTGTGCCAGCAGTGAT--CCGGGACAGGGG--CAGGTATGGGGGCTCCATTTCTGACTGGAGGGGTTGTG--CCTGTGT
C57BL_6-Thymus-1	37700	TRBV12-01	38	TGCTATGTACTTCTGTGCCAGCTCTCTC--GAGAGGGGGAGAGG--CAGGTATGGGGGCTCCATTTCTGACTGGAGGGGTTGTG--CCTGTGT
BALB_C-Thymus-1	69024	TRBV12-01	38	GACTCTGCTATGTACTTCTGTGCCAGCTCTC--CCGACAGGGGG--CAGGTATGGGGGCTCCATTTCTGACTGGAGGGGTTGTG--CCTGTGT
BALB_C-Spleen-1	38049	TRBV04-01	38	AGGACTCTGCTGTGTATCTCTGTGCCAGCAGCTAAGA--TGGGG--CAGGTATGGGGGCTCCATTTCTGACTGGAGGGGTTGTG--CCTGTGT
C57BL_6-Thymus-1	80219	TRBV04-01	38	TCTGCTGTGTATCTCTGTGCCAGCAGCT--GAGAGGGACAGGGG--CAGGTATGGGGGCTCCATTTCTGACTGGAGGGGTTGTG--CCTGTGT
BALB_C-Thymus-2	272371	TRBV03-01	38	TGGAGGACTCAGCTGTGTACTTCTGTGCCAGCAGCTTAG--GGG--CAGGTATGGGGGCTCCATTTCTGACTGGAGGGGTTGTG--CCTGTGT
C57BL_6-Thymus-2	120547	TRBV03-01	38	GGACTCAGCTGTGTACTTCTGTGCCAGCAGC--CCTGGACAGGG--CAGGTATGGGGGCTCCATTTCTGACTGGAGGGGTTGTG--CCTGTGT
C57BL_6-Thymus-2	147304	TRBV03-01	38	GGACTCAGCTGTGTACTTCTGTGCCAGCAGC--CCGGGACAGGG--CAGGTATGGGGGCTCCATTTCTGACTGGAGGGGTTGTG--CCTGTGT
C57BL_6-Thymus-1	211813	TRBV03-01	38	GGACTCAGCTGTGTACTTCTGTGCCAGCAGCT--CGGACAGGGT--CAGGTATGGGGGCTCCATTTCTGACTGGAGGGGTTGTG--CCTGTGT
BALB_C-Thymus-2	224146	TRBV02-01	38	GACTCGGCCACATACTTCTGTGCCAGCAGCCA--GGGACAGGGG--CAGGTATGGGGGCTCCATTTCTGACTGGAGGGGTTGTG--CCTGTGT
BALB_C-Thymus-2	247953	TRBV01-01	38	CCAGGGCAGAACCTTGTACTGCACCTGCAGTGCAGA--ACGGGT--CAGGTATGGGGGCTCCATTTCTGACTGGAGGGGTTGTG--CCTGTGT
BALB_C-Thymus-2	83033	TRBV01-01	38	GAACCTTGTACTGCACCTGCAGTGCAGA--TATGACAGGGGGCG--CAGGTATGGGGGCTCCATTTCTGACTGGAGGGGTTGTG--CCTGTGT
C57BL_6-Thymus-2	90198	TRBV01-01	38	AGGGCAGAACCTTGTACTGCACCTGCAGTGCAG--GGCAGGGGG--CAGGTATGGGGGCTCCATTTCTGACTGGAGGGGTTGTG--CCTGTGT
C57BL_6-Thymus-2	217871	TRBV01-01	38	GCAGAACCTTGTACTGCACCTGCAGTGCAGA--TCAGGGGGGCG--CAGGTATGGGGGCTCCATTTCTGACTGGAGGGGTTGTG--CCTGTGT
BALB_C-Thymus-1	181562	TRBV31-01	37	GCCACTCTGGCTTCTACCTCTGTGCCTGGAGTC--TACAGGGGGG--AGGTATGGGGGCTCCATTTCTGACTGGAGGGGTTGTG--CCTGTGT
C57BL_6-Thymus-1	303469	TRBV29-01	37	CAAACCAGACATCTGTGTACTTCTGTGCTAGCAG--CCCAAAATG--AGGTATGGGGGCTCCATTTCTGACTGGAGGGGTTGTG--CCTGTGT
BALB_C-Thymus-2	25066	TRBV29-01	37	CAGACATCTGTGTACTTCTGTGCTAGCAGTTTAT--GGGGCGGGG--AGGTATGGGGGCTCCATTTCTGACTGGAGGGGTTGTG--CCTGTGT
BALB_C-Spleen-2	26602	TRBV29-01	37	ACCAGACATCTGTGTACTTCTGTGCTAGCAGTTTA--GTCCAGGG--AGGTATGGGGGCTCCATTTCTGACTGGAGGGGTTGTG--CCTGTGT
C57BL_6-Thymus-2	275941	TRBV29-01	37	ACCAGACATCTGTGTACTTCTGTGCTA--ACGGGACAGGGGAAGG--AGGTATGGGGGCTCCATTTCTGACTGGAGGGGTTGTG--CCTGTGT
BALB_C-Thymus-1	252367	TRBV29-01	37	ATCTGTGTACTTCTGTGCTAGCAGTTTAT--GGGACAGGGGGCGA--AGGTATGGGGGCTCCATTTCTGACTGGAGGGGTTGTG--CCTGTGT
C57BL_6-Thymus-2	306211	TRBV26-01	37	GACTCAGCACTGTACCTCTGTGCCAGCAGTC--CCCAGGGGGCTT--AGGTATGGGGGCTCCATTTCTGACTGGAGGGGTTGTG--CCTGTGT
BALB_C-Thymus-1	120348	TRBV26-01	37	GACTCAGCACTGTACCTCTGTGCCAGCAG--GGACAGGGGGCGAG--AGGTATGGGGGCTCCATTTCTGACTGGAGGGGTTGTG--CCTGTGT
C57BL_6-Thymus-2	306212	TRBV24-01	37	GACTCAGCACTGTAGCTCTGTGCCAGCAGTC--CTGTGAACAGGG--AGGTATGGGGGCTCCATTTCTGACTGGAGGGGTTGTG--CCTGTGT
BALB_C-Thymus-1	262849	TRBV22-01	37	GAGACTCAGTGTTATACCTCTGTGCCAGCA--CTCGGGCGGGGGG--AGGTATGGGGGCTCCATTTCTGACTGGAGGGGTTGTG--CCTGTGT
BALB_C-Thymus-2	59659	TRBV20-01	37	GAAGACAGAGGCTTATATCTCTGTGGTGCTAG--CGGGTAGGACG--AGGTATGGGGGCTCCATTTCTGACTGGAGGGGTTGTG--CCTGTGT
BALB_C-Spleen-1	72014	TRBV20-01	37	AAGACAGAGGCTTATATCTCTGTGGTGCTAGGGA--TCTTACAGG--AGGTATGGGGGCTCCATTTCTGACTGGAGGGGTTGTG--CCTGTGT
BALB_C-Thymus-2	195831	TRBV20-01	37	TATCTTGAAGACAGAGGCTTATATCTCTGTGGTGCTA--CAGGGA--AGGTATGGGGGCTCCATTTCTGACTGGAGGGGTTGTG--CCTGTGT
C57BL_6-Thymus-1	5898	TRBV20-01	37	CTTGAAGACAGAGGCTTATATCTCTGTGGTGCTAGGGA--AGGGA--AGGTATGGGGGCTCCATTTCTGACTGGAGGGGTTGTG--CCTGTGT
BALB_C-Thymus-1	233763	TRBV20-01	37	CTTGAAGACAGAGGCTTATATCTCTGTGGTGCT--CCGGGACAGG--AGGTATGGGGGCTCCATTTCTGACTGGAGGGGTTGTG--CCTGTGT
BALB_C-Thymus-1	292318	TRBV20-01	37	CTTGAAGACAGAGGCTTATATCTCTGTGGTGCTAG--AGGGGGGG--AGGTATGGGGGCTCCATTTCTGACTGGAGGGGTTGTG--CCTGTGT
C57BL_6-Thymus-2	102386	TRBV20-01	37	TCTTGAAGACAGAGGCTTATATCTCTGTGGTGCT--GACAGGGGA--AGGTATGGGGGCTCCATTTCTGACTGGAGGGGTTGTG--CCTGTGT
BALB_C-Thymus-1	219018	TRBV20-01	37	ACAGAGGCTTATATCTCTGTGGTGCT--CGGGGACAGGGAGGGTG--AGGTATGGGGGCTCCATTTCTGACTGGAGGGGTTGTG--CCTGTGT
BALB_C-Thymus-2	259855	TRBV19-01	37	GAACGAGATGGCCGTTTTTCTCTGTGCCAGCAGTAT--GGGGGGA--AGGTATGGGGGCTCCATTTCTGACTGGAGGGGTTGTG--CCTGTGT
BALB_C-Thymus-2	151335	TRBV19-01	37	AGAAGAACGAGATGGCCGTTTTTCTCTGTGCCAGCAG--AGGGGA--AGGTATGGGGGCTCCATTTCTGACTGGAGGGGTTGTG--CCTGTGT
BALB_C-Thymus-2	241322	TRBV19-01	37	AGAAGAACGAGATGGTCGTTTTTCTCTGTGCCAGCAG--AGGGGA--AGGTATGGGGGCTCCATTTCTGACTGGAGGGGTTGTG--CCTGTGT
C57BL_6-Thymus-2	279666	TRBV19-01	37	AGAACGAGATGGCCGTTTTTCTCTGTGCCAGCAGTAT--GAGGGG--AGGTATGGGGGCTCCATTTCTGACTGGAGGGGTTGTG--CCTGTGT
C57BL_6-Spleen-2	47892	TRBV19-01	37	AGATGGCCGTTTTTCTCTGTGCCAGCAG--AACCCCGGACAGGGT--AGGTATGGGGGCTCCATTTCTGACTGGAGGGGTTGTG--CCTGTGT
BALB_C-Thymus-2	77948	TRBV19-01	37	ATGGCCGTTTTTCTCTGTGCCAGCAG--ACCGGGACAGGGGAGAA--AGGTATGGGGGCTCCATTTCTGACTGGAGGGGTTGTG--CCTGTGT
BALB_C-Spleen-1	58171	TRBV19-01	37	AGAACGAGATGGCCGTTTTTCTCTGTGCCAGCAGT--TGACAGGG--AGGTATGGGGGCTCCATTTCTGACTGGAGGGGTTGTG--CCTGTGT
C57BL_6-Thymus-1	302513	TRBV19-01	37	ATGGCCGTTTTTCTCTGTGCCAGCAGTA--GGGGACAGGGGGCGG--AGGTATGGGGGCTCCATTTCTGACTGGAGGGGTTGTG--CCTGTGT
BALB_C-Spleen-1	47060	TRBV19-01	37	GAGATGGCCGTTTTTCTCTGTGCCAGCAGTAT--CGGGGGGCGCG--AGGTATGGGGGCTCCATTTCTGACTGGAGGGGTTGTG--CCTGTGT
C57BL_6-Thymus-1	198049	TRBV19-01	37	ATGGCCGTTTTTCTCTGTGCCAGCAG--GGACAGGGGGCTGGTAG--AGGTATGGGGGCTCCATTTCTGACTGGAGGGGTTGTG--CCTGTGT
BALB_C-Spleen-2	47441	TRBV19-01	37	CGAGATGGCCGTTTTTCTCTGTGCCAGCAGTATAG--GACAGGGA--AGGTATGGGGGCTCCATTTCTGACTGGAGGGGTTGTG--CCTGTGT
C57BL_6-Thymus-2	50567	TRBV16-01	37	CCCAGGACTCAGCGGTGTATCTTTGTGCAAGCAGC--AGGACGGA--AGGTATGGGGGCTCCATTTCTGACTGGAGGGGTTGTG--CCTGTGT
C57BL_6-Thymus-1	102725	TRBV16-01	37	CAGGACTCAGCGGTGTATCTTTGTGCAAGCAGC--GACGGGACAA--AGGTATGGGGGCTCCATTTCTGACTGGAGGGGTTGTG--CCTGTGT
C57BL_6-Thymus-2	112188	TRBV16-01	37	CAGGACTCAGCGGTGTATCTTTGTGCAAGCAGC--CTCAGGGGGG--AGGTATGGGGGCTCCATTTCTGACTGGAGGGGTTGTG--CCTGTGT
BALB_C-Thymus-2	151768	TRBV16-01	37	AGGACTCAGCGGTGTATCTTTGTGCAAGCAGC--CCGGACAGGGG--AGGTATGGGGGCTCCATTTCTGACTGGAGGGGTTGTG--CCTGTGT
BALB_C-Thymus-1	88115	TRBV16-01	37	CCAGGACTCAGCGGTGTATCTTTGTGCAAGCAGCTTA--ACG--GACAGGTATGGGGGCTCCATTTCTGACTGGAGGGGTTGTG--CCTGTGT
BALB_C-Thymus-1	262695	TRBV16-01	37	GACTCAGCGGTGTATCTTTGTGCAAGCAGCT--AACAGGGTCGAG--AGGTATGGGGGCTCCATTTCTGACTGGAGGGGTTGTG--CCTGTGT
C57BL_6-Thymus-1	151864	TRBV16-01	37	GACTCAGCGGTGTATCTTTGTGCAAGCAGCT--CGGACAGGGATT--AGGTATGGGGGCTCCATTTCTGACTGGAGGGGTTGTG--CCTGTGT
C57BL_6-Spleen-2	51813	TRBV15-01	37	GGACTCAGCTGTGTATCTGTGTGCCAGCAG--CCTCCGGGGAGGG--AGGTATGGGGGCTCCATTTCTGACTGGAGGGGTTGTG--CCTGTGT
BALB_C-Thymus-1	283211	TRBV15-01	37	CCAAGGACTCAGCTGTGTATCTGTGTGCCAGCAGTTTAG--ACGT--AGGTATGGGGGCTCCATTTCTGACTGGAGGGGTTGTG--CCTGTGT
BALB_C-Thymus-1	44901	TRBV15-01	37	GAACCCAAGGACTCAGCTGTGTATCTGTGTGCCAGCAGTTTA--A--AGGTATGGGGGCTCCATTTCTGACTGGAGGGGTTGTG--CCTGTGT
BALB_C-Thymus-1	148598	TRBV15-01	37	AGCTGTGTATCTGTGTGCCAGCAGTTTAG--GGAGGGACAGGGGG--AGGTATGGGGGCTCCATTTCTGACTGGAGGGGTTGTG--CCTGTGT
BALB_C-Thymus-1	255187	TRBV15-01	37	CCAAGGACTCAGCTGTGTATCTGTGTGCCAGCAGTT--GACAGGG--AGGTATGGGGGCTCCATTTCTGACTGGAGGGGTTGTG--CCTGTGT
BALB_C-Spleen-1	45025	TRBV13-03	37	TTTCTCAGACAGCTGTATATTTCTGTGCCAGCAGTGA--ACGGGA--AGGTATGGGGGCTCCATTTCTGACTGGAGGGGTTGTG--CCTGTGT
BALB_C-Thymus-2	242056	TRBV13-02	37	AGTGTACTTCTGTGCCAGCGGTG--GTCACCGGGACAGGGGAGGG--AGGTATGGGGGCTCCATTTCTGACTGGAGGGGTTGTG--CCTGTGT
C57BL_6-Spleen-1	71010	TRBV13-02	37	TCAGTGTACTTCTGTGCCAGCGGT--CTTCTGACAGGGGGCGCGA--AGGTATGGGGGCTCCATTTCTGACTGGAGGGGTTGTG--CCTGTGT
C57BL_6-Spleen-2	10272	TRBV13-02	37	CCCCCTCTCAGACATCAGTGTACTTCTGTGCC--GGAGACAGGGA--AGGTATGGGGGCTCCATTTCTGACTGGAGGGGTTGTG--CCTGTGT
BALB_C-Thymus-1	50490	TRBV13-02	37	CTCAGACATCAGTGTACTTCTGTGCCAGCGGTG--CCAGGGGGCG--AGGTATGGGGGCTCCATTTCTGACTGGAGGGGTTGTG--CCTGTGT
BALB_C-Thymus-2	55546	TRBV13-02	37	AGACATCAGTGTACTTCTGTGCCAGCG--GGGATGCGGGACAGGG--AGGTATGGGGGCTCCATTTCTGACTGGAGGGGTTGTG--CCTGTGT
C57BL_6-Thymus-2	112891	TRBV13-02	37	CCCCCTCTCAGACATCAGTGTACTTCTGTGCCA--ACAGGGGGCG--AGGTATGGGGGCTCCATTTCTGACTGGAGGGGTTGTG--CCTGTGT
BALB_C-Thymus-2	163261	TRBV13-02	37	GACATCAGTGTACTTCTGTGCCAGCGGTG--GGACAGGGGGCGCG--AGGTATGGGGGCTCCATTTCTGACTGGAGGGGTTGTG--CCTGTGT
BALB_C-Thymus-2	267064	TRBV13-02	37	TCTCAGACATCAGTGTACTTCTGTGCCAGCGGTG--GGGACAGGG--AGGTATGGGGGCTCCATTTCTGACTGGAGGGGTTGTG--CCTGTGT
C57BL_6-Spleen-2	41114	TRBV13-02	37	TCAGACATCAGTGTACTTCTGTGCCAGCGGTGA--GACAGGGGGG--AGGTATGGGGGCTCCATTTCTGACTGGAGGGGTTGTG--CCTGTGT
BALB_C-Thymus-1	50023	TRBV13-01	37	CCCTCTCAGACATCTTTGTACTTCTGTGCCAGCAGTG--GAGGGG--AGGTATGGGGGCTCCATTTCTGACTGGAGGGGTTGTG--CCTGTGT
BALB_C-Thymus-2	78678	TRBV13-01	37	CAGACATCTTTGTACTTCTGTGCCAGCAGTGA--AATGACAGGGA--AGGTATGGGGGCTCCATTTCTGACTGGAGGGGTTGTG--CCTGTGT
BALB_C-Thymus-2	154570	TRBV13-01	37	CAGACATCTTTGTACTTCTGTGCCAGCAGT--CCGGGACAGGGGA--AGGTATGGGGGCTCCATTTCTGACTGGAGGGGTTGTG--CCTGTGT
BALB_C-Thymus-1	201896	TRBV13-01	37	CTCTCAGACATCTTTGTACTTCTGTGCCAGCAGTGA--AACAGGG--AGGTATGGGGGCTCCATTTCTGACTGGAGGGGTTGTG--CCTGTGT
BALB_C-Thymus-1	251492	TRBV12-02	37	AGGACTCTGCCGTGTACTTCTGTGCCAGCTCTC--GACAGGGGGA--AGGTATGGGGGCTCCATTTCTGACTGGAGGGGTTGTG--CCTGTGT
C57BL_6-Thymus-1	217285	TRBV12-02	37	TCTGCCGTGTACTTCTGTGCCAGCTCTCTC--GACAGGGGGCGAG--AGGTATGGGGGCTCCATTTCTGACTGGAGGGGTTGTG--CCTGTGT
C57BL_6-Thymus-2	267169	TRBV12-01	37	TGGAGGACTCTGCTATGTACTTCTGTGCCAGCTCTC--GGGAGGG--AGGTATGGGGGCTCCATTTCTGACTGGAGGGGTTGTG--CCTGTGT
C57BL_6-Spleen-2	38415	TRBV12-01	37	GGAGGACTCTGCTATGTACTTCTGTGCCAGCTCTCTC-GGGGGG--AGGTATGGGGGCTCCATTTCTGACTGGAGGGGTTGTG--CCTGTGT
C57BL_6-Thymus-1	47834	TRBV12-01	37	ACTGGAGGACTCTGCTATGTACTTCTGTGCCAGCTCTC--CTTTA--AGGTATGGGGGCTCCATTTCTGACTGGAGGGGTTGTG--CCTGTGT
BALB_C-Thymus-1	22749	TRBV12-01	37	CTGGAGGACTCTGCTATGTACTTCTGTGCCAG--TTGGGGGGGCG--AGGTATGGGGGCTCCATTTCTGACTGGAGGGGTTGTG--CCTGTGT
BALB_C-Thymus-1	168036	TRBV05-01	37	ACTCAGCTGTCTATTTTTGTGCCAGCAGCCAAGA--GGGCCAGGG--AGGTATGGGGGCTCCATTTCTGACTGGAGGGGTTGTG--CCTGTGT
BALB_C-Thymus-2	224145	TRBV05-01	37	GACTCAGCTGTCTATTTTTGTGCCAGCAGCCAAGATTGAGGGG--AGGTATGGGGGCTCCATTTCTGACTGGAGGGGTTGTG--CCTGTGT
BALB_C-Thymus-1	139569	TRBV05-01	37	TCAGCTGTCTATTTTTGTGCCAGCAGC--CCCCCCGGGACAGGGA--AGGTATGGGGGCTCCATTTCTGACTGGAGGGGTTGTG--CCTGTGT
BALB_C-Thymus-1	206367	TRBV05-01	37	GACTCAGCTGTCTATTTTTGTGCCAGCAGCA--CCCGGACAGGAG--AGGTATGGGGGCTCCATTTCTGACTGGAGGGGTTGTG--CCTGTGT
C57BL_6-Thymus-2	216878	TRBV05-01	37	GACTCAGCTGTCTATTTTTGTGCCAGCAGC--CAAGAAGAGGGGG--AGGTATGGGGGCTCCATTTCTGACTGGAGGGGTTGTG--CCTGTGT
BALB_C-Spleen-1	82110	TRBV05-01	37	AAGACTCAGCTGTCTATTTTTGTGCCAGCAGCC--CACAGGGGAG--AGGTATGGGGGCTCCATTTCTGACTGGAGGGGTTGTG--CCTGTGT
C57BL_6-Spleen-2	34765	TRBV05-01	37	AGACTCAGCTGTCTATTTTTGTGCCAGCAGCCA--CGACAGGGGT--AGGTATGGGGGCTCCATTTCTGACTGGAGGGGTTGTG--CCTGTGT
BALB_C-Thymus-2	260691	TRBV05-01	37	GACTCAGCTGTCTATTTTTGTGCCAGCAGCCAAG--GGACAGGGG--AGGTATGGGGGCTCCATTTCTGACTGGAGGGGTTGTG--CCTGTGT
C57BL_6-Spleen-1	9687	TRBV04-01	37	AGGACTCTGCTGTGTATCTCTGTGCCAGCAGCTA--GGACGGAGG--AGGTATGGGGGCTCCATTTCTGACTGGAGGGGTTGTG--CCTGTGT
BALB_C-Thymus-2	117234	TRBV04-01	37	GCCGGAGGACTCTGCTGTGTATCTCTGTGCCAGCAGC--CACAAA--AGGTATGGGGGCTCCATTTCTGACTGGAGGGGTTGTG--CCTGTGT
C57BL_6-Thymus-2	212467	TRBV04-01	37	CTGCTGTGTATCTCTGTGCCAGCAGCT--CCTTACAGGGAGGAGG--AGGTATGGGGGCTCCATTTCTGACTGGAGGGGTTGTG--CCTGTGT
BALB_C-Thymus-1	64432	TRBV04-01	37	ACTCTGCTGTGTATCTCTGTGCCAGCAGC--CCCGGACAGGGATG--AGGTATGGGGGCTCCATTTCTGACTGGAGGGGTTGTG--CCTGTGT
BALB_C-Thymus-1	98532	TRBV04-01	37	ACTCTGCTGTGTATCTCTGTGCCAGCAGC--CGGGACAGGGGAGG--AGGTATGGGGGCTCCATTTCTGACTGGAGGGGTTGTG--CCTGTGT
BALB_C-Thymus-2	224147	TRBV04-01	37	GACTCTGCTGTGTATCTCTGTGCCAGCAGCTA--GGGGGGCTGGG--AGGTATGGGGGCTCCATTTCTGACTGGAGGGGTTGTG--CCTGTGT
C57BL_6-Spleen-1	75237	TRBV03-01	37	GGAGGACTCAGCTGTGTACTTCTGTGCCAGCAGC--CCGGACAAA--AGGTATGGGGGCTCCATTTCTGACTGGAGGGGTTGTG--CCTGTGT
BALB_C-Thymus-2	165560	TRBV03-01	37	TCAGCTGTGTACTTCTGTGCCAGCAGC--CCCCCTGGGACAGGGG--AGGTATGGGGGCTCCATTTCTGACTGGAGGGGTTGTG--CCTGTGT
BALB_C-Thymus-2	33670	TRBV03-01	37	AGGACTCAGCTGTGTACTTCTGTGCCAGCAG--GAAGGACAGGGA--AGGTATGGGGGCTCCATTTCTGACTGGAGGGGTTGTG--CCTGTGT
BALB_C-Spleen-2	37063	TRBV03-01	37	TCAGCTGTGTACTTCTGTGCCAGCAGC--CCCGGGACAGGGGGCG--AGGTATGGGGGCTCCATTTCTGACTGGAGGGGTTGTG--CCTGTGT
BALB_C-Thymus-1	281942	TRBV03-01	37	CAGCTGTGTACTTCTGTGCCAGCAGCTT--TTGACAGGGGAGGAG--AGGTATGGGGGCTCCATTTCTGACTGGAGGGGTTGTG--CCTGTGT
BALB_C-Thymus-2	164613	TRBV03-01	37	GGAGGACTCAGCTGTGTACTTCTGTGCCAGCAGCT--CCAGGGGG--AGGTATGGGGGCTCCATTTCTGACTGGAGGGGTTGTG--CCTGTGT
C57BL_6-Thymus-1	36168	TRBV03-01	37	GAGGACTCAGCTGTGTACTTCTGTGCCAGCAGCTTA--CCAGGGG--AGGTATGGGGGCTCCATTTCTGACTGGAGGGGTTGTG--CCTGTGT
C57BL_6-Spleen-1	15199	TRBV03-01	37	CAGCTGTGTACTTCTGTGCCAGCAGCTTAG--GACAGGGGGCGCG--AGGTATGGGGGCTCCATTTCTGACTGGAGGGGTTGTG--CCTGTGT
C57BL_6-Thymus-2	218485	TRBV02-01	37	GGCCACATACTTCTGTGCCAGCAGCCAAGA--TCCACAGGGGGCG--AGGTATGGGGGCTCCATTTCTGACTGGAGGGGTTGTG--CCTGTGT
BALB_C-Thymus-1	138102	TRBV02-01	37	GACTCGGCCACATACTTCTGTGCCAGCAGCCA--TAGGGACAGGG--AGGTATGGGGGCTCCATTTCTGACTGGAGGGGTTGTG--CCTGTGT
BALB_C-Thymus-1	116053	TRBV02-01	37	CGGCCACATACTTCTGTGCCAGCAGCCAAGA--GGGGGACAGGGA--AGGTATGGGGGCTCCATTTCTGACTGGAGGGGTTGTG--CCTGTGT
C57BL_6-Thymus-1	273686	TRBV02-01	37	CTCGGCCACATACTTCTGTGCCAGCAGCCAAGA--GCTGGGGGCG--AGGTATGGGGGCTCCATTTCTGACTGGAGGGGTTGTG--CCTGTGT
BALB_C-Spleen-1	38620	TRBV02-01	37	CGGCCACATACTTCTGTGCCAGCAGCCAAG--GACAGGGGAAGGG--AGGTATGGGGGCTCCATTTCTGACTGGAGGGGTTGTG--CCTGTGT
C57BL_6-Thymus-1	166056	TRBV01-01	37	AGCCAGGGCAGAACCTTGTACTGCACCTGCAGTGC--CCCGAGGG--AGGTATGGGGGCTCCATTTCTGACTGGAGGGGTTGTG--CCTGTGT
C57BL_6-Thymus-1	121587	TRBV01-01	37	CAACATGAGCCAGGGCAGAACCTTGTACTGCACCTGCAGTGCA--AGGTATGGGGGCTCCATTTCTGACTGGAGGGGTTGTG--CCTGTGT
C57BL_6-Thymus-2	120595	TRBV01-01	37	GGCAGAACCTTGTACTGCACCTGCAGTGCAG-TCCGGGACAGGG--AGGTATGGGGGCTCCATTTCTGACTGGAGGGGTTGTG--CCTGTGT
C57BL_6-Thymus-1	15786	TRBV01-01	37	AGCCAGGGCAGAACCTTGTACTGCACCTGCAGTGC--GGACAGGG--AGGTATGGGGGCTCCATTTCTGACTGGAGGGGTTGTG--CCTGTGT
BALB_C-Thymus-2	93874	TRBV13-02	36	CCCTCTCAGACATCAGTGTACTTCTGTGCCAGCGGTGA--AACAGG--GGTATGGGGGCTCCATTTCTGACTGGAGGGGTTGTG--CCTGTGT
C57BL_6-Spleen-1	17745	TRBV02-01	36	TGATGACTCGGCCACATACTTCTGTGCCAGCAGCC--GGGGACAGG--GGTATGGGGGCTCCATTTCTGACTGGAGGGGTTGTG--CCTGTGT
C57BL_6-Thymus-1	260781	TRBV24-01	36	AAGAAGACGACTCAGCACTGTAGCTCTGTGCCAGCAGTCTG--TAC--GGTATGGGGGCTCCATTTCTGACTGGAGGGGTTGTG--CCTGTGT
BALB_C-Thymus-2	47845	TRBV31-01	36	CACTCTGGCTTCTACCTCTGTGCCTGGAGTCT--AGTACCGGAGAG--GGTATGGGGGCTCCATTTCTGACTGGAGGGGTTGTG--CCTGTGT
BALB_C-Thymus-2	18603	TRBV31-01	36	CAGCCACTCTGGCTTCTACCTCTGTGCCTGGAGT--TCCCCCGGGG--GGTATGGGGGCTCCATTTCTGACTGGAGGGGTTGTG--CCTGTGT
C57BL_6-Thymus-2	144346	TRBV31-01	36	CTTCTACCTCTGTGCCTGGAGT--CCCACCGGGACAGGGGAGAAGG--GGTATGGGGGCTCCATTTCTGACTGGAGGGGTTGTG--CCTGTGT
C57BL_6-Thymus-2	23071	TRBV31-01	36	CTTCTCAGCCACTCTGGCTTCTACCTCTGTGCCT--ATACAGGGGT--GGTATGGGGGCTCCATTTCTGACTGGAGGGGTTGTG--CCTGTGT
BALB_C-Spleen-1	64582	TRBV31-01	36	CTTCTCAGCCACTCTGGCTTCTACCTCTGTGCCTGGA--ACGGGGG--GGTATGGGGGCTCCATTTCTGACTGGAGGGGTTGTG--CCTGTGT
BALB_C-Thymus-1	22004	TRBV31-01	36	CACTCTGGCTTCTACCTCTGTGCCTGGAG--AAGGGACAGGGGGCG--GGTATGGGGGCTCCATTTCTGACTGGAGGGGTTGTG--CCTGTGT
C57BL_6-Thymus-2	136765	TRBV31-01	36	CAGCCACTCTGGCTTCTACCTCTGTGCCTGGA--ACAGGGGTGGGG--GGTATGGGGGCTCCATTTCTGACTGGAGGGGTTGTG--CCTGTGT
BALB_C-Thymus-1	117863	TRBV31-01	36	CTCTGGCTTCTACCTCTGTGCTTGGAGT--GACAGGGTGGTGGGTG--GGTATGGGGGCTCCATTTCTGACTGGAGGGGTTGTG--CCTGTGT
BALB_C-Thymus-1	203853	TRBV30-01	36	CTGGAGACAGCAGTATCTATTTCTGTAGTTCTAGA--CTCAGTCGG--GGTATGGGGGCTCCATTTCTGACTGGAGGGGTTGTG--CCTGTGT
BALB_C-Thymus-1	294412	TRBV30-01	36	GAGACAGCAGTATCTATTTCTGTAGTTCTAGAG--GCCAGGGGGAG--GGTATGGGGGCTCCATTTCTGACTGGAGGGGTTGTG--CCTGTGT
C57BL_6-Spleen-1	14811	TRBV30-01	36	AAGGCCTGGAGACAGCAGTATCTATTTCTGTAGTTCTAGA--CAGG--GGTATGGGGGCTCCATTTCTGACTGGAGGGGTTGTG--CCTGTGT
BALB_C-Thymus-1	304244	TRBV30-01	36	TGGAGACAGCAGTATCTATTTCTGTAGTTCTAGAG--GGACAGGGG--GGTATGGGGGCTCCATTTCTGACTGGAGGGGTTGTG--CCTGTGT
C57BL_6-Thymus-2	279721	TRBV29-01	36	AGACATCTGTGTACTTCTGTGCTAGCAG--CCACGACAGAGGGCGC--GGTATGGGGGCTCCATTTCTGACTGGAGGGGTTGTG--CCTGTGT
C57BL_6-Thymus-2	162047	TRBV29-01	36	AGACATCTGTGTACTTCTGTGCTAGCAGT--CCCCCTCCGGGGGAG--GGTATGGGGGCTCCATTTCTGACTGGAGGGGTTGTG--CCTGTGT
BALB_C-Thymus-2	33172	TRBV29-01	36	ACAAACCAGACATCTGTGTACTTCTGTGCTAGCAGT--CCCGAACG--GGTATGGGGGCTCCATTTCTGACTGGAGGGGTTGTG--CCTGTGT
BALB_C-Spleen-1	31591	TRBV29-01	36	CAAACCAGACATCTGTGTACTTCTGTGCTAGCAGTT--AAGGGGAG--GGTATGGGGGCTCCATTTCTGACTGGAGGGGTTGTG--CCTGTGT
BALB_C-Thymus-2	135961	TRBV29-01	36	CTGCTAAAACAAACCAGACATCTGTGTACTTCTGTGC--GGGGCGG--GGTATGGGGGCTCCATTTCTGACTGGAGGGGTTGTG--CCTGTGT
C57BL_6-Thymus-2	87271	TRBV29-01	36	AAAACAAACCAGACATCTGTGTACTTCTGTGCTAGCAGTTTAT--G--GGTATGGGGGCTCCATTTCTGACTGGAGGGGTTGTG--CCTGTGT
BALB_C-Thymus-2	40790	TRBV29-01	36	CCAGACATCTGTGTACTTCTGTGCTAGCAG--CCCCGGACAGGCTG--GGTATGGGGGCTCCATTTCTGACTGGAGGGGTTGTG--CCTGTGT
BALB_C-Spleen-2	46615	TRBV29-01	36	AAACCAGACATCTGTGTACTTCTGTGCTAGCA--ACGGGGGGGGCG--GGTATGGGGGCTCCATTTCTGACTGGAGGGGTTGTG--CCTGTGT
BALB_C-Spleen-2	80144	TRBV29-01	36	AAACCAGACATCTGTGTACTTCTGTGCTAGC--AAGGGGGGGGGCG--GGTATGGGGGCTCCATTTCTGACTGGAGGGGTTGTG--CCTGTGT
BALB_C-Spleen-1	14846	TRBV29-01	36	AGACATCTGTGTACTTCTGTGCTAGCAGT--CCTACAGGGGGCGCG--GGTATGGGGGCTCCATTTCTGACTGGAGGGGTTGTG--CCTGTGT
BALB_C-Thymus-1	167887	TRBV29-01	36	ACCAGACATCTGTGTACTTCTGTGCTAGCAG--CCGACAGGGCAGG--GGTATGGGGGCTCCATTTCTGACTGGAGGGGTTGTG--CCTGTGT
BALB_C-Thymus-1	110549	TRBV29-01	36	AACCAGACATCTGTGTACTTCTGTGCTAGCAG--GCGGACAGGGGC--GGTATGGGGGCTCCATTTCTGACTGGAGGGGTTGTG--CCTGTGT
C57BL_6-Thymus-2	17074	TRBV29-01	36	ACCAGACATCTGTGTACTTCTGTGCTAGCAGTTT--GCCAGGGGAG--GGTATGGGGGCTCCATTTCTGACTGGAGGGGTTGTG--CCTGTGT
C57BL_6-Thymus-1	279418	TRBV29-01	36	GACATCTGTGTACTTCTGTGCTAGCAGTTTAT--TAAGGGGGCGGG--GGTATGGGGGCTCCATTTCTGACTGGAGGGGTTGTG--CCTGTGT
C57BL_6-Thymus-2	194289	TRBV29-01	36	ACAAACCAGACATCTGTGTACTTCTGTGCTAGCAG--CGGGACAGG--GGTATGGGGGCTCCATTTCTGACTGGAGGGGTTGTG--CCTGTGT
C57BL_6-Thymus-2	194288	TRBV29-01	36	ACAAACCAGACATCTGTGTACTTCTGTGCTAGCAG--ACAGGGGAG--GGTATGGGGGCTCCATTTCTGACTGGAGGGGTTGTG--CCTGTGT
BALB_C-Thymus-1	273045	TRBV29-01	36	AACCAGACATCTGTGTACTTCTGTGCTAGCAGTTTA--CAGGGGCG--GGTATGGGGGCTCCATTTCTGACTGGAGGGGTTGTG--CCTGTGT
C57BL_6-Spleen-1	35278	TRBV29-01	36	CCAGACATCTGTGTACTTCTGTGCTAGCAGTTTATC--ACAGGGCG--GGTATGGGGGCTCCATTTCTGACTGGAGGGGTTGTG--CCTGTGT
C57BL_6-Thymus-2	77040	TRBV26-01	36	CTCAGCACTGTACCTCTGTGCCAGCAGTCTGTC--GATCGGGAAGC--GGTATGGGGGCTCCATTTCTGACTGGAGGGGTTGTG--CCTGTGT
C57BL_6-Thymus-2	238550	TRBV26-01	36	AGACTCAGCACTGTACCTCTGTGCCAGCAGTCTG--CCGCAGGGAG--GGTATGGGGGCTCCATTTCTGACTGGAGGGGTTGTG--CCTGTGT
BALB_C-Spleen-1	67589	TRBV26-01	36	AGGCAGGAGACTCAGCACTGTACCTCTGTGCCAGCAG--AGGGAGG--GGTATGGGGGCTCCATTTCTGACTGGAGGGGTTGTG--CCTGTGT
BALB_C-Spleen-1	60100	TRBV26-01	36	GACTCAGCACTGTACCTCTGTGCCAGCAGTCTGTC--AGAGGGGGG--GGTATGGGGGCTCCATTTCTGACTGGAGGGGTTGTG--CCTGTGT
BALB_C-Thymus-1	207087	TRBV26-01	36	GCAGGAGACTCAGCACTGTACCTCTGTGCCAGCAGTC--AAGGGGG--GGTATGGGGGCTCCATTTCTGACTGGAGGGGTTGTG--CCTGTGT
BALB_C-Thymus-1	192819	TRBV26-01	36	ACTCAGCACTGTACCTCTGTGCCAGCAG--GGGGACAGGGGGCCGG--GGTATGGGGGCTCCATTTCTGACTGGAGGGGTTGTG--CCTGTGT
C57BL_6-Thymus-2	238551	TRBV26-01	36	AGACTCAGCACTGTACCTCTGTGCCAGCAGTCTGT--GAGGGGGCG--GGTATGGGGGCTCCATTTCTGACTGGAGGGGTTGTG--CCTGTGT
C57BL_6-Thymus-2	192570	TRBV24-01	36	AAGACGACTCAGCACTGTAGCTCTGTGCCAGCAGTC--CCAGGGTG--GGTATGGGGGCTCCATTTCTGACTGGAGGGGTTGTG--CCTGTGT
BALB_C-Thymus-2	163007	TRBV24-01	36	GAAGAAGACGACTCAGCACTGTAGCTCTGTGCCAGCA--AGGGAGG--GGTATGGGGGCTCCATTTCTGACTGGAGGGGTTGTG--CCTGTGT
C57BL_6-Thymus-2	70855	TRBV24-01	36	AAGACGACTCAGCACTGTAGCTCTGTGCCAGCAGTCTGTA--TAAG--GGTATGGGGGCTCCATTTCTGACTGGAGGGGTTGTG--CCTGTGT
BALB_C-Thymus-1	217699	TRBV24-01	36	AAGAAGACGACTCAGCACTGTAGCTCTGTGCCAGCAGTCTG--TTG--GGTATGGGGGCTCCATTTCTGACTGGAGGGGTTGTG--CCTGTGT
C57BL_6-Thymus-1	70454	TRBV24-01	36	AGAAGACGACTCAGCACTGTAGCTCTGTGCCAGCAGTCTGTA--TT--GGTATGGGGGCTCCATTTCTGACTGGAGGGGTTGTG--CCTGTGT
C57BL_6-Thymus-1	99783	TRBV24-01	36	AGAAGACGACTCAGCACTGTAGCTCTGTGCCAGCA--CCCCGGGGG--GGTATGGGGGCTCCATTTCTGACTGGAGGGGTTGTG--CCTGTGT
BALB_C-Thymus-1	97918	TRBV24-01	36	ACGACTCAGCACTGTAGCTCTGTGCCAGCAGTC--CCACAGGGGAG--GGTATGGGGGCTCCATTTCTGACTGGAGGGGTTGTG--CCTGTGT
BALB_C-Thymus-1	147111	TRBV24-01	36	ACGACTCAGCACTGTAGCTCTGTGCCAGCAGTCTGTA--TAAGGGG--GGTATGGGGGCTCCATTTCTGACTGGAGGGGTTGTG--CCTGTGT
C57BL_6-Thymus-2	129313	TRBV24-01	36	AAGAAGACGACTCAGCACTGTAGCTCTGTGCCA--AACAGGGGGCG--GGTATGGGGGCTCCATTTCTGACTGGAGGGGTTGTG--CCTGTGT
C57BL_6-Thymus-1	271076	TRBV24-01	36	CGACTCAGCACTGTAGCTCTGTGCCAGCAGTCTG--ACAGGGAAAG--GGTATGGGGGCTCCATTTCTGACTGGAGGGGTTGTG--CCTGTGT
C57BL_6-Thymus-2	19547	TRBV21-01	36	TCAGCTGTGTACTTCTGTGCTAGCAGTCAATC--GGCAGGGAGATG--GGTATGGGGGCTCCATTTCTGACTGGAGGGGTTGTG--CCTGTGT
BALB_C-Thymus-2	224814	TRBV21-01	36	GATTCAGCTGTGTACTTCTGTGCTAGCAG--CCGACAGGGGGCGAG--GGTATGGGGGCTCCATTTCTGACTGGAGGGGTTGTG--CCTGTGT
BALB_C-Thymus-1	112670	TRBV20-01	36	AGACAGAGGCTTATATCTCTGTGGTGCTAGGGA--TCCGGCAGGGC--GGTATGGGGGCTCCATTTCTGACTGGAGGGGTTGTG--CCTGTGT
BALB_C-Spleen-1	67767	TRBV20-01	36	ATCTTGAAGACAGAGGCTTATATCTCTGTGGTGCT--CAGGGTATC--GGTATGGGGGCTCCATTTCTGACTGGAGGGGTTGTG--CCTGTGT
BALB_C-Spleen-1	41733	TRBV20-01	36	AGAGGCTTATATCTCTGTGGTGCTAGG--TAGGTCCACAGGGGGCG--GGTATGGGGGCTCCATTTCTGACTGGAGGGGTTGTG--CCTGTGT
BALB_C-Thymus-2	195273	TRBV20-01	36	GGCTTATATCTCTGTGGTGCTAGGGA--TCAGGGGACAGGGGGCTT--GGTATGGGGGCTCCATTTCTGACTGGAGGGGTTGTG--CCTGTGT
BALB_C-Spleen-1	74822	TRBV20-01	36	GAAGACAGAGGCTTATATCTCTGTGGTGCTA--CCGGGACAGGGGG--GGTATGGGGGCTCCATTTCTGACTGGAGGGGTTGTG--CCTGTGT
C57BL_6-Spleen-1	26093	TRBV20-01	36	TGAAGACAGAGGCTTATATCTCTGTGGTGCTAGG--CCGGGACAGG--GGTATGGGGGCTCCATTTCTGACTGGAGGGGTTGTG--CCTGTGT
BALB_C-Thymus-2	163008	TRBV20-01	36	GAAGACAGAGGCTTATATCTCTGTGGTGCTAG--AACAGGGGAGGG--GGTATGGGGGCTCCATTTCTGACTGGAGGGGTTGTG--CCTGTGT
C57BL_6-Thymus-1	244305	TRBV20-01	36	GAAGACAGAGGCTTATATCTCTGTGGTGCTAG--TGGGACAGGGAG--GGTATGGGGGCTCCATTTCTGACTGGAGGGGTTGTG--CCTGTGT
C57BL_6-Thymus-1	331318	TRBV20-01	36	TGAAGACAGAGGCTTATATCTCTGTGGTGCTAG--AGGGACAGGGG--GGTATGGGGGCTCCATTTCTGGCTGGAGGGGTTGTG--CCTGTGT
C57BL_6-Thymus-1	134014	TRBV20-01	36	TGAAGACAGAGGCTTATATCTCTGTGGTGCTAGG--TACAGGGGTG--GGTATGGGGGCTCCATTTCTGACTGGAGGGGTTGTG--CCTGTGT
BALB_C-Spleen-2	42232	TRBV20-01	36	GACAGAGGCTTATATCTCTGTGGTGCTAGGGA--CGGACAGGGGAG--GGTATGGGGGCTCCATTTCTGACTGGAGGGGTTGTG--CCTGTGT
C57BL_6-Thymus-2	156183	TRBV20-01	36	TTGAAGACAGAGGCTTATATCTCTGTGGTGC--GGGACAGGGAGGG--GGTATGGGGGCTCCATTTCTGACTGGAGGGGTTGTG--CCTGTGT
C57BL_6-Thymus-2	282785	TRBV20-01	36	ATCTTGAAGACAGAGGCTTATATCTCTGTGGTGCTA--ACAGGGCG--GGTATGGGGGCTCCATTTCTGACTGGAGGGGTTGTG--CCTGTGT
BALB_C-Thymus-1	217406	TRBV19-01	36	AACGAGATGGCCGTTTTTCTCTGTGCCAGCAGTAT--CGGACAAGG--GGTATGGGGGCTCCATTTCTGACTGGAGGGGTTGTG--CCTGTGT
C57BL_6-Thymus-1	191161	TRBV19-01	36	AACGAGATGGCCGTTTTTCTCTGTGCCAGCAGTAT--TAAGGGGTG--GGTATGGGGGCTCCATTTCTGACTGGAGGGGTTGTG--CCTGTGT
BALB_C-Thymus-1	284266	TRBV19-01	36	CGAGATGGCCGTTTTTCTCTGTGCCAGCAGTATAG--GGGGAGAGG--GGTATGGGGGCTCCATTTCTGACTGGAGGGGTTGTG--CCTGTGT
C57BL_6-Spleen-1	50578	TRBV19-01	36	AGAACGAGATGGCCGTTTTTCTCTGTGCCAGCAGTATAG--CTAAG--GGTATGGGGGCTCCATTTCTGACTGGAGGGGTTGTG--CCTGTGT
BALB_C-Spleen-2	48965	TRBV19-01	36	TGGCCGTTTTTCTCTGTGCCAGCAGT--TCCCCCGGGACAGGGAGG--GGTATGGGGGCTCCATTTCTGACTGGAGGGGTTGTG--CCTGTGT
BALB_C-Thymus-2	260890	TRBV19-01	36	GAGATGGCCGTTTTTCTCTGTGCCAGCAGT--TCCCTCGGGGGCGG--GGTATGGGGGCTCCATTTCTGACTGGAGGGGTTGTG--CCTGTGT
BALB_C-Thymus-2	163816	TRBV19-01	36	GAGATGGCCGTTTTTCTCTGTGCCAGCAGT--CCCCCCGGGACAGG--GGTATGGGGGCTCCATTTCTGACTGGAGGGGTTGTG--CCTGTGT
C57BL_6-Thymus-2	168976	TRBV19-01	36	CGAGATGGCCGTTTTTCTCTGTGCCAGCAGT--CCTAACAGGGGCG--GGTATGGGGGCTCCATTTCTGACTGGAGGGGTTGTG--CCTGTGT
BALB_C-Thymus-1	169750	TRBV19-01	36	AGATGGCCGTTTTTCTCTGTGCCAGCAGTAT--GACTACAGGGCTC--GGTATGGGGGCTCCATTTCTGACTGGAGGGGTTGTG--CCTGTGT
C57BL_6-Spleen-2	38304	TRBV19-01	36	GAGATGGCCGTTTTTCTCTGTGCCAGCAGT--CCCGACAGGGGGCT--GGTATGGGGGCTCCATTTCTGACTGGAGGGGTTGTG--CCTGTGT
BALB_C-Thymus-2	194668	TRBV19-01	36	GATGGCCGTTTTTCTCTGTGCCAGCAGTAT--GGGAGGGGGCTGGT--GGTATGGGGGCTCCATTTCTGACTGGAGGGGTTGTG--CCTGTGT
C57BL_6-Thymus-1	319150	TRBV19-01	36	GAACGAGATGGCCGTTTTTCTCTGTGCCAGCA--CCCAGGGGGATT--GGTATGGGGGCTCCATTTCTGACTGGAGGGGTTGTG--CCTGTGT
BALB_C-Thymus-2	127373	TRBV19-01	36	AGAACGAGATGGCCGTTTTTCTCTGTGCCAGCAG--CTCAGGGGTT--GGTATGGGGGCTCCATTTCTGACTGGAGGGGTTGTG--CCTGTGT
C57BL_6-Thymus-1	162345	TRBV19-01	36	AACGAGATGGCCGTTTTTCTCTGTGCCAGCAG--ACACAGGGGGCT--GGTATGGGGGCTCCATTTCTGACTGGAGGGGTTGTG--CCTGTGT
BALB_C-Thymus-1	97249	TRBV19-01	36	AAGAACGAGATGGCCGTTTTTCTCTGTGCCAGCAGT--TCCAGGGG--GGTATGGGGGCTCCATTTCTGACTGGAGGGGTTGTG--CCTGTGT
C57BL_6-Thymus-2	273147	TRBV19-01	36	AAGAACGAGATGGCCGTTTTTCTCTGTGCC--GGGGGGGGCGCGCG--GGTATGGGGGCTCCATTTCTGACTGGAGGGGTTGTG--CCTGTGT
BALB_C-Thymus-1	194147	TRBV19-01	36	AGAACGAGATGGCCGTTTTTCTCTGTGCCAGCAG--AGACAGGGAG--GGTATGGGGGCTCCATTTCTGACTGGAGGGGTTGTG--CCTGTGT
BALB_C-Spleen-1	43286	TRBV19-01	36	GAACGAGATGGCCGTTTTTCTCTGTGCCAGCAG--GGGGACAGGGC--GGTATGGGGGCTCCATTTCTGACTGGAGGGGTTGTG--CCTGTGT
BALB_C-Spleen-1	85504	TRBV19-01	36	GAACGAGACGGCCGTTTTTCTCTGTGCCAGCAG--GGGGACAGGGC--GGTATGGGGGCTCCATTTCTGACTGGAGGGGTTGTG--CCTGTGT
BALB_C-Thymus-1	207088	TRBV17-01	36	GCAGGCCTAGAGTATTCTGCCATGTACCTCTGTGCTAGCA--AGGC--GGTATGGGGGCTCCATTTCTGACTGGAGGGGTTGTG--CCTGTGT
BALB_C-Thymus-2	246494	TRBV17-01	36	CAGGCCTAGAGTATTCTGCCATGTACCTCTGTGCTAGCAGT--GGG--GGTATGGGGGCTCCATTTCTGACTGGAGGGGTTGTG--CCTGTGT
C57BL_6-Thymus-2	48899	TRBV17-01	36	AGGCCTAGAGTATTCTGCCATGTACCTCTGTGC--CAACAGGGGGC--GGTATGGGGGCTCCATTTCTGACTGGAGGGGTTGTG--CCTGTGT
BALB_C-Thymus-1	200367	TRBV16-01	36	CTCAGCGGTGTATCTTTGTGCAAGCAGCTTAGA--TGAGAGGGAAG--GGTATGGGGGCTCCATTTCTGACTGGAGGGGTTGTG--CCTGTGT
C57BL_6-Spleen-1	39170	TRBV16-01	36	GGACTCAGCGGTGTATCTTTGTGCAAGCAGCTTA--AAGGGGCAGG--GGTATGGGGGCTCCATTTCTGACTGGAGGGGTTGTG--CCTGTGT
C57BL_6-Thymus-1	200991	TRBV16-01	36	CCCAGGACTCAGCGGTGTATCTTTGTGCAAGC--TGCCCGGGGGGG--GGTATGGGGGCTCCATTTCTGACTGGAGGGGTTGTG--CCTGTGT
BALB_C-Spleen-1	45450	TRBV16-01	36	ACTCAGCGGTGTATCTTTGTGCAAGCAG--CGCTAACAGGGAAGGG--GGTATGGGGGCTCCATTTCTGACTGGAGGGGTTGTG--CCTGTGT
C57BL_6-Thymus-2	179573	TRBV16-01	36	GGACTCAGCGGTGTATCTTTGTGCAAGCAGC--CCCTGACAGGGAG--GGTATGGGGGCTCCATTTCTGACTGGAGGGGTTGTG--CCTGTGT
BALB_C-Spleen-1	24193	TRBV16-01	36	GGACTCAGCGGTGTATCTTTGTGCAAGCAGC--CCTCACAGGGGGG--GGTATGGGGGCTCCATTTCTGACTGGAGGGGTTGTG--CCTGTGT
BALB_C-Thymus-1	98936	TRBV16-01	36	AGGACTCAGCGGTGTATCTTTGTGCAAGCAGCT--CCCTCAGGGGT--GGTATGGGGGCTCCATTTCTGACTGGAGGGGTTGTG--CCTGTGT
BALB_C-Thymus-2	116380	TRBV16-01	36	GACTCAGCGGTGTATCTTTGTGCAAGCAGCTTAGA--TCGCCAGGG--GGTATGGGGGCTCCATTTCTGACTGGAGGGGTTGTG--CCTGTGT
C57BL_6-Thymus-1	5951	TRBV16-01	36	GACTCAGCGGTGTATCTTTGTGCAAGCAGCTT--TTTGACAGGAGG--GGTATGGGGGCTCCATTTCTGACTGGAGGGGTTGTG--CCTGTGT
C57BL_6-Thymus-1	78393	TRBV16-01	36	TCAGCGGTGTATCTTTGTGCAAGCAGC--CTGGGACAGGGGGCGGG--GGTATGGGGGCTCCATTTCTGACTGGAGGGGTTGTG--CCTGTGT
C57BL_6-Thymus-1	141260	TRBV16-01	36	AGGACTCAGCGGTGTATCTTTGTGCAAGCAGC--CCGGACAGGGTG--GGTATGGGGGCTCCATTTCTGACTGGAGGGGTTGTG--CCTGTGT
BALB_C-Thymus-1	172879	TRBV16-01	36	CAGGACTCAGCGGTGTATCTTTGTGCAAGCAGCTTAG--CTCAGGG--GGTATGGGGGCTCCATTTCTGACTGGAGGGGTTGTG--CCTGTGT
C57BL_6-Thymus-1	293434	TRBV16-01	36	AACCCCAGGACTCAGCGGTGTATCTTTG--CGGGACAGGGGGCGCC--GGTATGGGGGCTCCATTTCTGACTGGAGGGGTTGTG--CCTGTGT
BALB_C-Thymus-1	206366	TRBV16-01	36	GACTCAGCGGTGTATCTTTGTGCAAGCAGCT--CGGACAGGTAGTT--GGTATGGGGGCTCCATTTCTGACTGGAGGGGTTGTG--CCTGTGT
C57BL_6-Thymus-1	321434	TRBV16-01	36	GGACTCAGCGGTGTATCTTTGTGCAAGCAGCTT--GTGGGGGGGCG--GGTATGGGGGCTCCATTTCTGACTGGAGGGGTTGTG--CCTGTGT
BALB_C-Spleen-1	28279	TRBV16-01	36	ACCCCAGGACTCAGCGGTGTATCTTTGTGCAAGCAG--GGGACACG--GGTATGGGGGCTCCATTTCTGACTGGAGGGGTTGTG--CCTGTGT
C57BL_6-Thymus-2	219931	TRBV15-01	36	TCAGCTGTGTATCTGTGTGCCAGCAGTTTAG--AGACAGAGGGCGC--GGTATGGGGGCTCCATTTCTGACTGGAGGGGTTGTG--CCTGTGT
BALB_C-Spleen-1	7312	TRBV15-01	36	AAGGACTCAGCTGTGTATCTGTGTGCCAGCAG--CTAGACAAACTG--GGTATGGGGGCTCCATTTCTGACTGGAGGGGTTGTG--CCTGTGT
BALB_C-Thymus-2	34493	TRBV15-01	36	CCAAGGACTCAGCTGTGTATCTGTGTGCCAGCAG--GTCAGGGAGG--GGTATGGGGGCTCCATTTCTGACTGGAGGGGTTGTG--CCTGTGT
BALB_C-Thymus-2	247875	TRBV15-01	36	CCAAGGACTCAGCTGTGTATCTGTGTGCCAGCAG--GTCAGGGAGG--GGTATGGGGGCTCCACTTCTGACTGGAGGGGTTGTG--CCTGTGT
C57BL_6-Thymus-1	264743	TRBV15-01	36	AGGACTCAGCTGTGTATCTGTGTGCCAGCAGTTTAG--GGGCAGCG--GGTATGGGGGCTCCATTTCTGACTGGAGGGGTTGTG--CCTGTGT
BALB_C-Thymus-1	221478	TRBV15-01	36	AGGACTCAGCTGTGTATCTGTGTGCCAGCAGTTTAGC--GGGGGTG--GGTATGGGGGCTCCATTTCTGACTGGAGGGGTTGTG--CCTGTGT
C57BL_6-Thymus-1	58495	TRBV15-01	36	AGCTGTGTATCTGTGTGCCAGCAG--GTCCTAGACAGGGGGCAGAG--GGTATGGGGGCTCCATTTCTGACTGGAGGGGTTGTG--CCTGTGT
BALB_C-Thymus-1	153083	TRBV15-01	36	CTCAGCTGTGTATCTGTGTGCCAGCAGT--GTCCCGGGACAGGGCG--GGTATGGGGGCTCCATTTCTGACTGGAGGGGTTGTG--CCTGTGT
C57BL_6-Thymus-2	258608	TRBV15-01	36	GGACTCAGCTGTGTATCTGTGTGCCAGCAGTTT--CAGCAGGGGGG--GGTATGGGGGCTCCATTTCTGACTGGAGGGGTTGTG--CCTGTGT
C57BL_6-Thymus-1	294380	TRBV15-01	36	AAGGACTCAGCTGTGTATCTGTGTGCCAGCAG--CCGGGACAGAGG--GGTATGGGGGCTCCATTTCTGACTGGAGGGGTTGTG--CCTGTGT
BALB_C-Thymus-2	139106	TRBV15-01	36	GGACTCAGCTGTGTATCTGTGTGCCAGCAGT--AGACAGGGGGCCG--GGTATGGGGGCTCCATTTCTGACTGGAGGGGTTGTG--CCTGTGT
BALB_C-Thymus-1	59846	TRBV15-01	36	GACTCAGCTGTGTATCTGTGTGCCAGCAGTT--CCAGGGGGCGCCT--GGTATGGGGGCTCCATTTCTGACTGGAGGGGTTGTG--CCTGTGT
BALB_C-Spleen-1	64855	TRBV15-01	36	GACTCAGCTGTGTATCTGTGTGCCAGCAGTTT--TCAGGGGCCGGG--GGTATGGGGGCTCCATTTCTGACTGGAGGGGTTGTG--CCTGTGT
BALB_C-Thymus-2	163520	TRBV15-01	36	GACTCAGCTGTGTATCTGTGTGCCAGCAGTTT--TCAGGGGGAACT--GGTATGGGGGCTCCATTTCTGACTGGAGGGGTTGTG--CCTGTGT
BALB_C-Spleen-2	38630	TRBV15-01	36	CAAGGACTCAGCTGTGTATCTGTGTGCCAGCAGTTTAG--GACAGG--GGTATGGGGGCTCCATTTCTGACTGGAGGGGTTGTG--CCTGTGT
BALB_C-Thymus-2	117279	TRBV14-01	36	GCGACACAGCCACCTATCTCTGTGCCAGCAGTTT--TGGGGGAGGG--GGTATGGGGGCTCCATTTCTGACTGGAGGGGTTGTG--CCTGTGT
BALB_C-Thymus-2	182899	TRBV14-01	36	CAGGGCGACACAGCCACCTATCTCTGTGCCAGCA--CCGACAGGGG--GGTATGGGGGCTCCATTTCTGACTGGAGGGGTTGTG--CCTGTGT
BALB_C-Thymus-2	245848	TRBV14-01	36	CAGAGCGACACAGCCACCTATCTCTGTGCCAGCA--CCGACAGGGG--GGTATGGGGGCTCCATTTCTGACTGGAGGGGTTGTG--CCTGTGT
BALB_C-Thymus-1	295305	TRBV14-01	36	GGCGACACAGCCACCTATCTCTGTGCCAGCAGTTC--CGACAGGGT--GGTATGGGGGCTCCATTTCTGACTGGAGGGGTTGTG--CCTGTGT
C57BL_6-Thymus-2	280822	TRBV14-01	36	AGGGCGACACAGCCACCTATCTCTGTGCCAGCAGTTT--GAGGGGG--GGTATGGGGGCTCCATTTCTGACTGGAGGGGTTGTG--CCTGTGT
BALB_C-Spleen-2	76745	TRBV14-01	36	AGGGCGACACAGCCACCTATCTCTGTGCCAGCAGT--CCAGGGGAG--GGTATGGGGGCTCCATTTCTGACTGGAGGGGTTGTG--CCTGTGT
BALB_C-Spleen-2	83792	TRBV14-01	36	AGGGCGACACAGCCACCTACCTCTGTGCCAGCAGT--CCAGGGGAG--GGTATGGGGGCTCCATTTCTGACTGGAGGGGTTGTG--CCTGTGT
C57BL_6-Thymus-1	102692	TRBV14-01	36	CAGCCACCTATCTCTGTGCCAGCAGTTT--AGGACAGGGGGCCGTG--GGTATGGGGGCTCCATTTCTGACTGGAGGGGTTGTG--CCTGTGT
C57BL_6-Thymus-2	258026	TRBV14-01	36	GCAGGGCGACACAGCCACCTATCTCTGTGCCAGCAG--GACAGGGG--GGTATGGGGGCTCCATTTCTGACTGGAGGGGTTGTG--CCTGTGT
BALB_C-Thymus-2	223841	TRBV14-01	36	GACACAGCCACCTATCTCTGTGCCAGCAGTTTC--TAGGGGGCGGC--GGTATGGGGGCTCCATTTCTGACTGGAGGGGTTGTG--CCTGTGT
C57BL_6-Thymus-2	180875	TRBV13-03	36	TCAGACAGCTGTATATTTCTGTGCCAGCAGTGA--ACGGGGTTAGG--GGTATGGGGGCTCCATTTCTGACTGGAGGGGTTGTG--CCTGTGT
C57BL_6-Thymus-2	94023	TRBV13-03	36	CTCAGACAGCTGTATATTTCTGTGCCAGCAGTGAT--ACGGGGGAG--GGTATGGGGGCTCCATTTCTGACTGGAGGGGTTGTG--CCTGTGT
C57BL_6-Thymus-2	139744	TRBV13-03	36	CTCAGACAGCTGTATATTTCTGTGCCAGCAGTGATG--CGGGGGAG--GGTATGGGGGCTCCATTTCTGACTGGAGGGGTTGTG--CCTGTGT
BALB_C-Spleen-1	32949	TRBV13-03	36	TCAGACAGCTGTATATTTCTGTGCCAGCAGTGA--CCGGGACAGGC--GGTATGGGGGCTCCATTTCTGACTGGAGGGGTTGTG--CCTGTGT
BALB_C-Thymus-1	281941	TRBV13-03	36	CAGCTGTATATTTCTGTGCCAGCAGTGATG--CCGGGACAGGGTTG--GGTATGGGGGCTCCATTTCTGACTGGAGGGGTTGTG--CCTGTGT
C57BL_6-Thymus-1	130906	TRBV13-02	36	TCAGACATCAGTGTACTTCTGTGCCAGCGGTGATG--AAAGGGCTG--GGTATGGGGGCTCCATTTCTGACTGGAGGGGTTGTG--CCTGTGT
C57BL_6-Thymus-2	204836	TRBV13-02	36	CCCTCTCAGACATCAGTGTACTTCTGTGCCAGCGGTG--CCCGGAG--GGTATGGGGGCTCCATTTCTGACTGGAGGGGTTGTG--CCTGTGT
BALB_C-Thymus-1	102605	TRBV13-02	36	CTCTCAGACATCAGTGTACTTCTGTGCCAGCGGTGAT--AGGGGTG--GGTATGGGGGCTCCATTTCTGACTGGAGGGGTTGTG--CCTGTGT
C57BL_6-Spleen-2	45827	TRBV13-02	36	CTCTCAGACATCAGTGTACTTCTGTGCCAGCGGTGAT--AGGGGTC--GGTATGGGGGCTCCATTTCTGACTGGAGGGGTTGTG--CCTGTGT
C57BL_6-Spleen-2	59204	TRBV13-02	36	ACCCCCTCTCAGACATCAGTGTACTTCTGTGCCAGCG--GGGCACG--GGTATGGGGGCTCCATTTCTGACTGGAGGGGTTGTG--CCTGTGT
BALB_C-Thymus-1	173729	TRBV13-02	36	CCCTCTCAGACATCAGTGTACTTCTGTGCCAGCGGTGA--CTGACG--GGTATGGGGGCTCCATTTCTGACTGGAGGGGTTGTG--CCTGTGT
BALB_C-Thymus-1	219267	TRBV13-02	36	ACCCCCTCTCAGACATCAGTGTACTTCTGTGCCAGCGGTGAT--CG--GGTATGGGGGCTCCATTTCTGACTGGAGGGGTTGTG--CCTGTGT
BALB_C-Thymus-1	115552	TRBV13-02	36	CCCCCTCTCAGACATCAGTGTACTTCTGTGCCAGCGGTGATG--CT--GGTATGGGGGCTCCATTTCTGACTGGAGGGGTTGTG--CCTGTGT
C57BL_6-Thymus-2	88511	TRBV13-02	36	ACATCAGTGTACTTCTGTGCCAGCG--CCCCGGGACAGGGGAAAGG--GGTATGGGGGCTCCATTTCTGACTGGAGGGGTTGTG--CCTGTGT
BALB_C-Thymus-2	127408	TRBV13-02	36	AGACATCAGTGTACTTCTGTGCCAGCGGTG--TTCCGACAGGGGAG--GGTATGGGGGCTCCATTTCTGACTGGAGGGGTTGTG--CCTGTGT
C57BL_6-Thymus-2	26795	TRBV13-02	36	CAGACATCAGTGTACTTCTGTGCCAGCGATG--GGGACAGGGGCGC--GGTATGGGGGCTCCATTTCTGACTGGAGGGGTTGTG--CCTGTGT
BALB_C-Spleen-2	81326	TRBV13-02	36	CTCTCAGACATCAGTGTACTTCTGTGCCAGCG--TAGGGACAGGGG--GGTATGGGGGCTCCATTTCTGACTGGAGGGGTTGTG--CCTGTGT
C57BL_6-Thymus-2	148561	TRBV13-02	36	TCAGTGTACTTCTGTGCCAGCGGTGATG--CAGGGACAGGGGGCGG--GGTATGGGGGCTCCATTTCTGACTGGAGGGGTTGTG--CCTGTGT
BALB_C-Thymus-1	48281	TRBV13-02	36	ACATCAGTGTACTTCTGTGCCAGCGGTGAT--CGGGACAGGGGAGG--GGTATGGGGGCTCCATTTCTGACTGGAGGGGTTGTG--CCTGTGT
C57BL_6-Thymus-1	83553	TRBV13-01	36	ACATCTTTGTACTTCTGTGCCAGCAGT--CCTCAGGACCTGCTACG--GGTATGGGGGCTCCATTTCTGACTGGAGGGGTTGTG--CCTGTGT
C57BL_6-Thymus-2	177687	TRBV13-01	36	GACATCTTTGTACTTCTGTGCCAGCAGTGATG--TCCAGGGCAGAG--GGTATGGGGGCTCCATTTCTGACTGGAGGGGTTGTG--CCTGTGT
BALB_C-Thymus-2	112106	TRBV13-01	36	CTCAGACATCTTTGTACTTCTGTGCCAGCAGTGAT--CCGACGGTG--GGTATGGGGGCTCCATTTCTGACTGGAGGGGTTGTG--CCTGTGT
BALB_C-Spleen-2	34476	TRBV13-01	36	TCAGACATCTTTGTACTTCTGTGCCAGCAGTGA--ACGGACGGGGG--GGTATGGGGGCTCCATTTCTGACTGGAGGGGTTGTG--CCTGTGT
C57BL_6-Thymus-2	54842	TRBV13-01	36	TCAGACATCTTTGTACTTCTGTGCCAGCAG--CCTGGGACAGGGGG--GGTATGGGGGCTCCATTTCTGACTGGAGGGGTTGTG--CCTGTGT
C57BL_6-Spleen-2	23322	TRBV13-01	36	TCTCAGACATCTTTGTACTTCTGTGCCAGCAG--CGCAGGGGGCCG--GGTATGGGGGCTCCATTTCTGACTGGAGGGGTTGTG--CCTGTGT
C57BL_6-Thymus-1	264147	TRBV13-01	36	AGACATCTTTGTACTTCTGTGCCAGCAGTGATG--CGAGGGGGCAG--GGTATGGGGGCTCCATTTCTGACTGGAGGGGTTGTG--CCTGTGT
BALB_C-Spleen-1	35639	TRBV13-01	36	CTCTCAGACATCTTTGTACTTCTGTGCCAGCAGTG--GGACAGGGG--GGTATGGGGGCTCCATTTCTGACTGGAGGGGTTGTG--CCTGTGT
BALB_C-Thymus-1	101234	TRBV13-01	36	CCTCTCAGACATCTTTGTACTTCTGTGCCAGCAGTGATG--AGGGG--GGTATGGGGGCTCCATTTCTGACTGGAGGGGTTGTG--CCTGTGT
C57BL_6-Thymus-1	264744	TRBV12-02	36	AGGACTCTGCCGTGTACTTCTGTGCCAGCTCTCT--GGGGAGGACG--GGTATGGGGGCTCCATTTCTGACTGGAGGGGTTGTG--CCTGTGT
BALB_C-Thymus-2	225739	TRBV12-02	36	TAGAGGACTCTGCCGTGTACTTCTGTGCCAGCTCTCT--GGGGAGG--GGTATGGGGGCTCCATTTCTGACTGGAGGGGTTGTG--CCTGTGT
BALB_C-Thymus-2	164307	TRBV12-02	36	GCCGTGTACTTCTGTGCCAGCTCTCTC--GAGCTGGACAGGGGGCC--GGTATGGGGGCTCCATTTCTGACTGGAGGGGTTGTG--CCTGTGT
C57BL_6-Thymus-1	210416	TRBV12-02	36	GACTCTGCCGTGTACTTCTGTGCCAGCTCTCTC--GGGAGGACAGG--GGTATGGGGGCTCCATTTCTGACTGGAGGGGTTGTG--CCTGTGT
BALB_C-Thymus-2	51060	TRBV12-02	36	GCCGTGTACTTCTGTGCCAGCTCTCT--GCCGGGACAGGGTAAGAA--GGTATGGGGGCTCCATTTCTGACTGGAGGGGTTGTG--CCTGTGT
C57BL_6-Thymus-2	80512	TRBV12-02	36	GACTCTGCCGTGTACTTCTGTGCCAGCTCTCTC--TCCAGGGGGAA--GGTATGGGGGCTCCATTTCTGACTGGAGGGGTTGTG--CCTGTGT
BALB_C-Thymus-1	193859	TRBV12-02	36	ACTCTGCCGTGTACTTCTGTGCCAGCTCTCTC--GAGGGGGTCGGG--GGTATGGGGGCTCCATTTCTGACTGGAGGGGTTGTG--CCTGTGT
C57BL_6-Thymus-2	250425	TRBV12-01	36	CTCTGCTATGTACTTCTGTGCCAGCTCTC--CCCTAGTCCCAGCCG--GGTATGGGGGCTCCATTTCTGACTGGAGGGGTTGTG--CCTGTGT
BALB_C-Spleen-2	57406	TRBV12-01	36	GAGGACTCTGCTATGTACTTCTGTGCCAGCTCTC--CCGCAGGGAG--GGTATGGGGGCTCCATTTCTGACTGGAGGGGTTGTG--CCTGTGT
C57BL_6-Thymus-1	82884	TRBV12-01	36	AACTGGAGGACTCTGCTATGTACTTCTGTGCCAGCTCTC--CTATG--GGTATGGGGGCTCCATTTCTGACTGGAGGGGTTGTG--CCTGTGT
C57BL_6-Thymus-2	133311	TRBV12-01	36	AGGACTCTGCTATGTACTTCTGTGCCAGCTC--ACCCGGACAGGGG--GGTATGGGGGCTCCATTTCTGACTGGAGGGGTTGTG--CCTGTGT
BALB_C-Spleen-1	67588	TRBV12-01	36	AGGACTCTGCTATGTACTTCTGTGCCAGCTCTCT--TGGGACAAAG--GGTATGGGGGCTCCATTTCTGACTGGAGGGGTTGTG--CCTGTGT
C57BL_6-Thymus-2	194928	TRBV05-01	36	ACTCAGCTGTCTATTTTTGTGCCAGCAG--ACAAGTCCGGGCCCGG--GGTATGGGGGCTCCATTTCTGACTGGAGGGGTTGTG--CCTGTGT
BALB_C-Spleen-1	73665	TRBV05-01	36	CTCAGCTGTCTATTTTTGTGCCAGCAGCCAAGA--TGGGGGAAAGG--GGTATGGGGGCTCCATTTCTGACTGGAGGGGTTGTG--CCTGTGT
BALB_C-Thymus-1	166868	TRBV05-01	36	AAGACTCAGCTGTCTATTTTTGTGCCAGCAGCCA--GACAGCAGAG--GGTATGGGGGCTCCATTTCTGACTGGAGGGGTTGTG--CCTGTGT
C57BL_6-Thymus-1	298858	TRBV05-01	36	AGACTCAGCTGTCTATTTTTGTGCCAGCAGCCAA--AGAAGACAGT--GGTATGGGGGCTCCATTTCTGACTGGAGGGGTTGTG--CCTGTGT
C57BL_6-Thymus-2	306213	TRBV05-01	36	GACTCAGCTGTCTATTTTTGTGCCAGCAGCCAAG--GTCCCAGCCG--GGTATGGGGGCTCCATTTCTGACTGGAGGGGTTGTG--CCTGTGT
BALB_C-Spleen-1	72015	TRBV05-01	36	AAGACTCAGCTGTCTATTTTTGTGCCAGCAGCCAA--AACCCACAT--GGTATGGGGGCTCCATTTCTGACTGGAGGGGTTGTG--CCTGTGT
BALB_C-Thymus-2	148323	TRBV05-01	36	AAGACTCAGCTGTCTATTTTTGTGCCAGCAGCCAAG--GTGGGGGT--GGTATGGGGGCTCCATTTCTGACTGGAGGGGTTGTG--CCTGTGT
C57BL_6-Thymus-1	52425	TRBV05-01	36	GAAGACTCAGCTGTCTATTTTTGTGCCAGCAGCCAAG--CCAGGGT--GGTATGGGGGCTCCATTTCTGACTGGAGGGGTTGTG--CCTGTGT
BALB_C-Thymus-2	71057	TRBV05-01	36	GGATCCAGAAGACTCAGCTGTCTATTTTTGTGCCAGCAGCCA--TG--GGTATGGGGGCTCCATTTCTGACTGGAGGGGTTGTG--CCTGTGT
C57BL_6-Thymus-1	162666	TRBV05-01	36	AAGACTCAGCTGTCTATTTTTGTGCCAGCAGCC--CGCGACAGGAG--GGTATGGGGGCTCCATTTCTGACTGGAGGGGTTGTG--CCTGTGT
BALB_C-Thymus-2	264832	TRBV05-01	36	TCCAGAAGACTCAGCTGTCTATTTTTGTGCCAGCA--ACAGGGGAG--GGTATGGGGGCTCCATTTCTGACTGGAGGGGTTGTG--CCTGTGT
BALB_C-Spleen-2	36194	TRBV04-01	36	CGGAGGACTCTGCTGTGTATCTCTGTGCCAGCAGC--CGACAGTCC--GGTATGGGGGCTCCATTTCTGACTGGAGGGGTTGTG--CCTGTGT
BALB_C-Thymus-1	121109	TRBV04-01	36	GGACTCTGCTGTGTATCTCTGTGCCAGCAGCTAA--GGTGGACACG--GGTATGGGGGCTCCATTTCTGACTGGAGGGGTTGTG--CCTGTGT
BALB_C-Thymus-2	241869	TRBV04-01	36	AGGACTCTGCTGTGTATCTCTGTGCCAGCAGC--CAAGCGGGGTGG--GGTATGGGGGCTCCATTTCTGACTGGAGGGGTTGTG--CCTGTGT
C57BL_6-Thymus-2	73067	TRBV04-01	36	AGGACTCTGCTGTGTATCTCTGTGCCAGCAGCTAAGGGAGAGTG--GGTATGGGGGCTCCATTTCTGACTGGAGGGGTTGTG--CCTGTGT
C57BL_6-Thymus-2	308075	TRBV04-01	36	GTAGAGCCGGAGGACTCTGCTGTGTATCTCTGTGCCAGC--TTCTG--GGTATGGGGGCTCCATTTCTGACTGGAGGGGTTGTG--CCTGTGT
BALB_C-Spleen-1	43548	TRBV04-01	36	GCCGGAGGACTCTGCTGTGTATCTCTGTGCCAGCAGCTAA--ATGG--GGTATGGGGGCTCCATTTCTGACTGGAGGGGTTGTG--CCTGTGT
BALB_C-Thymus-2	240429	TRBV04-01	36	ACTCTGCTGTGTATCTCTGTGCCAGCAGCTAA--TCCGGGTGAGGG--GGTATGGGGGCTCCATTTCTGACTGGAGGGGTTGTG--CCTGTGT
BALB_C-Thymus-2	194828	TRBV04-01	36	GCCGGAGGACTCTGCTGTGTATCTCTGTGCCAGCAGCTAAG--GCG--GGTATGGGGGCTCCATTTCTGACTGGAGGGGTTGTG--CCTGTGT
BALB_C-Thymus-2	241432	TRBV04-01	36	AGAGCCGGAGGACTCTGCTGTGTATCTCTGTGCCAGCAGCTA--CG--GGTATGGGGGCTCCATTTCTGACTGGAGGGGTTGTG--CCTGTGT
BALB_C-Spleen-1	69825	TRBV04-01	36	GCCGGAGGACTCTGCTGTGTATCTCTGTGCCAGCAGCTAAGA--GG--GGTATGGGGGCTCCATTTCTGACTGGAGGGGTTGTG--CCTGTGT
BALB_C-Thymus-1	129809	TRBV04-01	36	AGCCGGAGGACTCTGCTGTGTATCTCTGTGCCAGCAGCTAAGA--G--GGTATGGGGGCTCCATTTCTGACTGGAGGGGTTGTG--CCTGTGT
C57BL_6-Thymus-2	218011	TRBV04-01	36	GCCGGAGGACTCTGCTGTGTATCTCTGTGCCA--CCGCGGGACACG--GGTATGGGGGCTCCATTTCTGACTGGAGGGGTTGTG--CCTGTGT
BALB_C-Thymus-2	87264	TRBV04-01	36	TGCTGTGTATCTCTGTGCCAGCAGC--CAACGGGGGCAGGGATGGG--GGTATGGGGGCTCCATTTCTGACTGGAGGGGTTGTG--CCTGTGT
BALB_C-Spleen-2	87137	TRBV04-01	36	TCTGCTGTGTATCTCTGTGCCAGCAGC--CTCCGGGACAGGGGACG--GGTATGGGGGCTCCATTTCTGACTGGAGGGGTTGTG--CCTGTGT
BALB_C-Thymus-2	231479	TRBV04-01	36	TGCTGTGTATCTCTGTGCCAGCAGCT--CACCGGGACAGGGAGGTG--GGTATGGGGGCTCCATTTCTGACTGGAGGGGTTGTG--CCTGTGT
BALB_C-Thymus-1	129954	TRBV04-01	36	AGGACTCTGCTGTGTATCTCTGTGCCAGCAGC--GAAACAGGGTAA--GGTATGGGGGCTCCATTTCTGACTGGAGGGGTTGTG--CCTGTGT
BALB_C-Spleen-2	29286	TRBV04-01	36	CTCTGCTGTGTATCTCTGTGCCAGCAGCT--CGGGACAGGGGGCGG--GGTATGGGGGCTCCATTTCTGACTGGAGGGGTTGTG--CCTGTGT
BALB_C-Thymus-1	112965	TRBV04-01	36	AGGACTCTGCTGTGTATCTCTGTGCCAGCAGCT--TGGGACAGGAG--GGTATGGGGGCTCCATTTCTGACTGGAGGGGTTGTG--CCTGTGT
BALB_C-Thymus-2	94302	TRBV04-01	33	CGGAGGACTCTGCTGTGTATCTCTGTGCCAGCAGCTAA--TACAGGGGA--ATGGGGGCTCCATTTCTGACTGGAGGGGTTGTG--CCTGTGT
C57BL_6-Thymus-2	218298	TRBV04-01	36	GCTGTGTATCTCTGTGCCAGCAGCTAAG--GGGGACAGGGGGAAGG--GGTATGGGGGCTCCATTTCTGACTGGAGGGGTTGTG--CCTGTGT
C57BL_6-Thymus-1	129118	TRBV04-01	36	GACTCTGCTGTGTATCTCTGTGCCAGCAG--GGACAGGGGAGGACG--GGTATGGGGGCTCCATTTCTGACTGGAGGGGTTGTG--CCTGTGT
BALB_C-Thymus-1	302746	TRBV04-01	36	TCTGCTGTGTATCTCTGTGCCAGCAGCTAA--GGGACAGGGGGACG--GGTATGGGGGCTCCATTTCTGACTGGAGGGGTTGTG--CCTGTGT
C57BL_6-Thymus-1	321194	TRBV03-01	36	GCTGTGTACTTCTGTGCCAGCAGCTTA--TTGGCGAGGGCGCGAAG--GGTATGGGGGCTCCATTTCTGACTGGAGGGGTTGTG--CCTGTGT
C57BL_6-Thymus-1	321435	TRBV03-01	36	GGACTCAGCTGTGTACTTCTGTGCCAGCAGC--GCCCGACAGGGGG--GGTATGGGGGCTCCATTTCTGACTGGAGGGGTTGTG--CCTGTGT
BALB_C-Spleen-1	16600	TRBV03-01	36	AGGACTCAGCTGTGTACTTCTGTGCCAGCAGC--CTCCGGGACAGG--GGTATGGGGGCTCCATTTCTGACTGGAGGGGTTGTG--CCTGTGT
BALB_C-Thymus-2	117486	TRBV03-01	36	GGACTCAGCTGTGTACTTCTGTGCCAGCAGC--CCAGGGACAGGGT--GGTATGGGGGCTCCATTTCTGACTGGAGGGGTTGTG--CCTGTGT
BALB_C-Thymus-1	264508	TRBV03-01	36	TCAGCTGTGTACTTCTGTGCCAGCAGCTTAG--CGCTCAGGGGTTC--GGTATGGGGGCTCCATTTCTGACTGGAGGGGTTGTG--CCTGTGT
C57BL_6-Thymus-2	202445	TRBV03-01	36	CACTGGAGGACTCAGCTGTGTACTTCTGTGCCAGCAGC--CCCAGG--GGTATGGGGGCTCCATTTCTGACTGGAGGGGTTGTG--CCTGTGT
BALB_C-Thymus-2	164007	TRBV03-01	36	GAGGACTCAGCTGTGTACTTCTGTGCCAGCAGCT--CGGGACAGGG--GGTATGGGGGCTCCATTTCTGACTGGAGGGGTTGTG--CCTGTGT
BALB_C-Thymus-2	263700	TRBV03-01	36	TCAGCTGTGTACTTCTGTGCCAGCAGCTTA--CCAGGGGGCCGGAG--GGTATGGGGGCTCCATTTCTGACTGGAGGGGTTGTG--CCTGTGT
BALB_C-Thymus-2	118069	TRBV03-01	36	TCAGCTGTGTACTTCTGTGCCAGCAGCTTA--AGGGACAGGGTCAG--GGTATGGGGGCTCCATTTCTGACTGGAGGGGTTGTG--CCTGTGT
C57BL_6-Thymus-2	307939	TRBV03-01	36	GGACTCAGCTGTGTACTTCTGTGCCAGCAGCTTAGA--GACAGGGG--GGTATGGGGGCTCCATTTCTGACTGGAGGGGTTGTG--CCTGTGT
C57BL_6-Spleen-2	62568	TRBV03-01	36	AGGACTCAGCTGTGTACTTCTGTGCCAGCAGCTTAG--TGGGGGGG--GGTATGGGGGCTCCATTTCTGACTGGAGGGGTTGTG--CCTGTGT
C57BL_6-Thymus-2	120106	TRBV02-01	36	GATGACTCGGCCACATACTTCTGTGCCAGCAGCCAAG--TTGGGTG--GGTATGGGGGCTCCATTTCTGACTGGAGGGGTTGTG--CCTGTGT
BALB_C-Thymus-2	117233	TRBV02-01	36	GCCACATACTTCTGTGCCAGCAGCCAAGA--TTCGCAGGGGGCGGG--GGTATGGGGGCTCCATTTCTGACTGGAGGGGTTGTG--CCTGTGT
BALB_C-Thymus-1	55659	TRBV02-01	36	ACTCGGCCACATACTTCTGTGCCAGCAGCCA--TCTACAGGGGTGG--GGTATGGGGGCTCCATTTCTGACTGGAGGGGTTGTG--CCTGTGT
BALB_C-Spleen-1	19527	TRBV02-01	36	GATGACTCGGCCACATACTTCTGTGCCAGCAGCCAAG--TTAGGGG--GGTATGGGGGCTCCATTTCTGACTGGAGGGGTTGTG--CCTGTGT
BALB_C-Thymus-1	255959	TRBV02-01	36	CGGCCACATACTTCTGTGCCAGCAGCCA--GGGGACAGGGGTAGAG--GGTATGGGGGCTCCATTTCTGACTGGAGGGGTTGTG--CCTGTGT
BALB_C-Spleen-1	51079	TRBV02-01	36	GACTCGGCCACATACTTCTGTGCCAGCAGCCAAGA--AGGGACAGG--GGTATGGGGGCTCCATTTCTGACTGGAGGGGTTGTG--CCTGTGT
BALB_C-Spleen-1	58018	TRBV02-01	36	ACTCGGCCACATACTTCTGTGCCAGCAGCCA--GGGACAGGGGGCG--GGTATGGGGGCTCCATTTCTGACTGGAGGGGTTGTG--CCTGTGT
BALB_C-Spleen-2	15130	TRBV02-01	36	CGGCCACATACTTCTGTGCCAGCAGCCAAG--GGGGGCCCGGGAGG--GGTATGGGGGCTCCATTTCTGACTGGAGGGGTTGTG--CCTGTGT
C57BL_6-Spleen-2	25176	TRBV02-01	36	TCGGCCACATACTTCTGTGCCAGCAGCCAAG--GGACAGGGGGCTT--GGTATGGGGGCTCCATTTCTGACTGGAGGGGTTGTG--CCTGTGT
C57BL_6-Thymus-2	15895	TRBV01-01	36	GCCAGGGCAGAACCTTGTACTGCACCTGCAGTG--GTCAGGCGGAG--GGTATGGGGGCTCCATTTCTGACTGGAGGGGTTGTG--CCTGTGT
C57BL_6-Thymus-1	119579	TRBV01-01	36	AGCCAGGGCAGAACCTTGTACTGCACCTGCAGTG--GAGGATGAGG--GGTATGGGGGCTCCATTTCTGACTGGAGGGGTTGTG--CCTGTGT
C57BL_6-Thymus-2	72790	TRBV01-01	36	AGCCAGGGCAGAACCTTGTACTGCACCTGCAGTGCA--CCCAGCCG--GGTATGGGGGCTCCATTTCTGACTGGAGGGGTTGTG--CCTGTGT
C57BL_6-Thymus-2	105780	TRBV01-01	36	AACATGAGCCAGGGCAGAACCTTGTACTGCACCTGCAGT--CGACG--GGTATGGGGGCTCCATTTCTGACTGGAGGGGTTGTG--CCTGTGT
C57BL_6-Spleen-2	59832	TRBV01-01	36	CATGAGCCAGGGCAGAACCTTGTACTGCACCTGCAGTGC--CCCTG--GGTATGGGGGCTCCATTTCTGACTGGAGGGGTTGTG--CCTGTGT
BALB_C-Thymus-2	15727	TRBV01-01	36	AGAACCTTGTACTGCACCTGCAGTGCAGA--TCTTTCGGGGGCGGG--GGTATGGGGGCTCCATTTCTGACTGGAGGGGTTGTG--CCTGTGT
C57BL_6-Spleen-1	47517	TRBV01-01	36	CCAGGGCAGAACCTTGTACTGCACCTGCAGT--CCAAACAGGGTGG--GGTATGGGGGCTCCATTTCTGACTGGAGGGGTTGTG--CCTGTGT
C57BL_6-Thymus-2	92864	TRBV01-01	36	CCAGGGCAGAACCTTGTACTGCACCTGCAGT--ATCGACAGGGGAG--GGTATGGGGGCTCCATTTCTGACTGGAGGGGTTGTG--CCTGTGT
C57BL_6-Thymus-1	139322	TRBV01-01	36	ACCTTGTACTGCACCTGCAGTGCAGA--TCCGGGACAGGGGGCCGG--GGTATGGGGGCTCCATTTCTGACTGGAGGGGTTGTG--CCTGTGT
BALB_C-Thymus-1	64768	TRBV01-01	36	AGGGCAGAACCTTGTACTGCACCTGCAG--GCGGGACAGGGGGCAG--GGTATGGGGGCTCCATTTCTGACTGGAGGGGTTGTG--CCTGTGT
C57BL_6-Thymus-2	179623	TRBV01-01	36	GGCAGAACCTTGTACTGCACCTGCAGTGCAGA--TGGGGACAGGGG--GGTATGGGGGCTCCATTTCTGACTGGAGGGGTTGTG--CCTGTGT
C57BL_6-Thymus-2	266537	TRBV01-01	36	TGAGCCAGGGCAGAACCTTGTACTGCACCTGCAGTGCA--CGGGGG--GGTATGGGGGCTCCATTTCTGACTGGAGGGGTTGTG--CCTGTGT
BALB_C-Thymus-1	37053	TRBV01-01	36	AGGGCAGAACCTTGTACTGCACCTGCAGTGCAG--GACAGGGGGCG--GGTATGGGGGCTCCATTTCTGACTGGAGGGGTTGTG--CCTGTGT
C57BL_6-Spleen-1	40523	TRBV20-01	36	AAGACAGAGGCTTATATCTCTGTGGTGCTAGGGA--CAGGGGGCGC--GGTATGGGGGCTCCATTTCTGACTGGAGGGGTTGTG--CCTGTGT
BALB_C-Thymus-1	283401	TRBV13-01	36	CCCTCTCAGACATCTTTGTACTTCTGTGCCAGCAGTGA--GGGAGG--GGTATGGGGGCTCCATTTCTGACTGGAGGGGTTGTG--CCTGTGT
BALB_C-Thymus-1	71126	TRBV04-01	35	TCTGCTGTGTATCTCTGTGCCAGCAGCT--CGCCGGGACAGGGGAGA--GTATGGGGGCTCCATTTCTGACTGGAGGGGTTGTG--CCTGTGT
C57BL_6-Thymus-2	143379	TRBV31-01	35	CTGCTTCTCAGCCACTCTGGCTTCTACCTCTGTGCCTGGAGTCA-T--GTATGGGGGCTCCATTTCTGACTGGAGGGGTTGTG--CCTGTGT
C57BL_6-Spleen-2	24334	TRBV31-01	35	CACTCTGGCTTCTACCTCTGTGCCTGGAGT--GGGACAGGGGGCGCA--GTATGGGGGCTCCATTTCTGACTGGAGGGGTTGTG--CCTGTGT
C57BL_6-Thymus-1	232453	TRBV29-01	35	CAGACATCTGTGTACTTCTGTGCTAGCAGTT--CCCCGGGGGGTCTA--GTATGGGGGCTCCATTTCTGACTGGAGGGGTTGTG--CCTGTGT
C57BL_6-Thymus-1	103360	TRBV29-01	35	CCAGACATCTGTGTACTTCTGTGCTAGCAGTTT--CGGCAGGGTGAA--GTATGGGGGCTCCATTTCTGACTGGAGGGGTTGTG--CCTGTGT
C57BL_6-Thymus-1	122683	TRBV29-01	35	CATCTGTGTACTTCTGTGCTAGCAGTTTA--CCCGGGACAGGGATTT--GTATGGGGGCTCCATTTCTGACTGGAGGGGTTGTG--CCTGTGT
C57BL_6-Thymus-1	59903	TRBV26-01	35	CAGGAGACTCAGCACTGTACCTCTGTGCCAGCAGTCTG--GGGGGAA--GTATGGGGGCTCCATTTCTGACTGGAGGGGTTGTG--CCTGTGT
C57BL_6-Spleen-1	30509	TRBV24-01	35	GACTCAGCACTGTAGCTCTGTGCCAGCAGTC--CGACAGGGGGCTGA--GTATGGGGGCTCCATTTCTGACTGGAGGGGTTGTG--CCTGTGT
C57BL_6-Thymus-2	54496	TRBV21-01	35	TAACAGATTCAGCTGTGTACTTCTGTGCTAGCA--CTCCGGGACAAA--GTATGGGGGCTCCATTTCTGACTGGAGGGGTTGTG--CCTGTGT
C57BL_6-Thymus-2	259435	TRBV20-01	35	TATCTTGAAGACAGAGGCTTATATCTCTGTGGTGCTAGG--ACAGGC--GTATGGGGGCTCCATTTCTGACTGGAGGGGTTGTG--CCTGTGT
BALB_C-Thymus-2	259891	TRBV20-01	35	GAAGACAGAGGCTTATATCTCTGTGGTGC--CCCGGGACAGGGACAT--GTATGGGGGCTCCATTTCTGACTGGAGGGGTTGTG--CCTGTGT
BALB_C-Spleen-2	35829	TRBV20-01	35	ATATCTTGAAGACAGAGGCTTATATCTCTGTGGTGC--CGACAGGGT--GTATGGGGGCTCCATTTCTGACTGGAGGGGTTGTG--CCTGTGT
C57BL_6-Thymus-2	245684	TRBV17-01	35	CCTAGAGTATTCTGCCATGTACCTCTGTGCTAGCAGTAG--TAGGAT--GTATGGGGGCTCCATTTCTGACTGGAGGGGTTGTG--CCTGTGT
C57BL_6-Thymus-1	202475	TRBV17-01	35	CTAGAGTATTCTGCCATGTACCTCTGTGCTAGC--CTCGGGACAATA--GTATGGGGGCTCCATTTCTGACTGGAGGGGTTGTG--CCTGTGT
C57BL_6-Thymus-1	78091	TRBV17-01	35	TATTCTGCCATGTACCTCTGTGCTAGCAGTAGAGA--GCAGGGGTGA--GTATGGGGGCTCCATTTCTGACTGGAGGGGTTGTG--CCTGTGT
C57BL_6-Thymus-2	167065	TRBV16-01	35	CAGCGGTGTATCTTTGTGCAAGCAGCTTAGA--TACTACAGGGCCAA--GTATGGGGGCTCCATTTCTGACTGGAGGGGTTGTG--CCTGTGT
C57BL_6-Thymus-1	295925	TRBV15-01	35	ACCCAAGGACTCAGCTGTGTATCTGTGTGCCAGCAGTT--GGGAGGA--GTATGGGGGCTCCATTTCTGACTGGAGGGGTTGTG--CCTGTGT
BALB_C-Thymus-1	150390	TRBV15-01	35	CAAGGACTCAGCTGTGTATCTGTGTGCCAGCAG--CTCCGGGACAGA--GTATGGGGGCTCCATTTCTGACTGGAGGGGTTGTG--CCTGTGT
C57BL_6-Thymus-1	281237	TRBV14-01	35	GGCGACACAGCCACCTATCTCTGTGCCAGCAGTTTC--GCAGGGGGA--GTATGGGGGCTCCATTTCTGACTGGAGGGGTTGTG--CCTGTGT
BALB_C-Thymus-1	245086	TRBV13-03	35	TTCTCAGACAGCTGTATATTTCTGTGCCAGCA--CACAGGGGAAGGA--GTATGGGGGCTCCATTTCTGACTGGAGGGGTTGTG--CCTGTGT
BALB_C-Spleen-1	45933	TRBV13-02	35	CAGACATCAGTGTACTTCTGTGCCAGCGGTGATG--CGAAGGGGCGT--GTATGGGGGCTCCATTTCTGACTGGAGGGGTTGTG--CCTGTGT
C57BL_6-Thymus-1	203160	TRBV13-02	35	CTCAGACATCAGTGTACTTCTGTGCCAGCGGTGATG--AACAGGGAA--GTATGGGGGCTCCATTTCTGACTGGAGGGGTTGTG--CCTGTGT
BALB_C-Thymus-1	154347	TRBV13-02	35	CTCTCAGACATCAGTGTACTTCTGTGCCAGCGGTGA--AGGGGGCGA--GTATGGGGGCTCCATTTCTGACTGGAGGGGTTGTG--CCTGTGT
BALB_C-Thymus-1	197365	TRBV13-01	35	CAGACATCTTTGTACTTCTGTGCCAGCAGT--AACCGGGACAGGGGT--GTATGGGGGCTCCATTTCTGACTGGAGGGGTTGTG--CCTGTGT
C57BL_6-Thymus-1	194652	TRBV12-01	35	ACTGGAGGACTCTGCTATGTACTTCTGTGCCAGCTC--GGGACTCAT--GTATGGGGGCTCCATTTCTGACTGGAGGGGTTGTG--CCTGTGT
C57BL_6-Thymus-2	16509	TRBV12-01	35	TGGAACTGGAGGACTCTGCTATGTACTTCTGTGCCAGCTCTC--CCC--GTATGGGGGCTCCATTTCTGACTGGAGGGGTTGTG--CCTGTGT
C57BL_6-Thymus-1	260785	TRBV05-01	35	AAGACTCAGCTGTCTATTTTTGTGCCAGCAGCC--CCGGACAGGGCA--GTATGGGGGCTCCATTTCTGACTGGAGGGGTTGTG--CCTGTGT
C57BL_6-Thymus-1	293778	TRBV05-01	35	AAGACTCAGCTGTCTATTTTTGTGCCAGCAGCC--CCGGACAGGGCA--GTATGGGGGCTCCATTTTTGACTGGAGGGGTTGTG--CCTGTGT
BALB_C-Thymus-1	207484	TRBV04-01	35	GGAGGACTCTGCTGTGTATCTCTGTGCCAGCAG--GGACAGGGGAGA--GTATGGGGGCTCCATTTCTGACTGGAGGGGTTGTG--CCTGTGT
C57BL_6-Thymus-2	278647	TRBV03-01	35	ACTGGAGGACTCAGCTGTGTACTTCTGTGCCAG--GATGTGGGGGAA--GTATGGGGGCTCCATTTCTGACTGGAGGGGTTGTG--CCTGTGT
BALB_C-Spleen-1	78905	TRBV03-01	35	CTCAGCTGTGTACTTCTGTGCCAGCAGCTTAG--ATCGGGACAGGGA--GTATGGGGGCTCCATTTCTGACTGGAGGGGTTGTG--CCTGTGT
BALB_C-Spleen-1	60385	TRBV03-01	35	GGAGGACTCAGCTGTGTACTTCTGTGCCAGCAGC--CTACAGGGAAC--GTATGGGGGCTCCATTTCTGACTGGAGGGGTTGTG--CCTGTGT
C57BL_6-Thymus-1	60423	TRBV02-01	35	CCTGATGACTCGGCCACATACTTCTGTGCCAGCAGCC--CCAGGGAA--GTATGGGGGCTCCATTTCTGACTGGAGGGGTTGTG--CCTGTGT
C57BL_6-Thymus-1	195790	TRBV01-01	35	AGGGCAGAACCTTGTACTGCACCTGCAGTGCAGA--TCCGGGGGCTT--GTATGGGGGCTCCATTTCTGACTGGAGGGGTTGTG--CCTGTGT
C57BL_6-Thymus-1	45418	TRBV01-01	35	TGAGCCAGGGCAGAACCTTGTACTGCACCTGCAGT--GGGGGGCGGT--GTATGGGGGCTCCATTTCTGACTGGAGGGGTTGTG--CCTGTGT
C57BL_6-Spleen-1	12327	TRBV17-01	35	CTAGAGTATTCTGCCATGTACCTCTGTGCTAGCAGTAGAG--GGACA--GTATGGGGGCTCCATTTCTGACTGGAGGGGTTGTG--CCTGTGT
C57BL_6-Thymus-1	91085	TRBV29-01	34	GACATCTGTGTACTTCTGTGCTAGCAGTTTATC--GAGGCAGGGAGGA--TATGGGGGCTCCATTTCTGACTGGAGGGGTTGTG--CCTGTGT
C57BL_6-Spleen-2	39714	TRBV24-01	34	AGACGACTCAGCACTGTAGCTCTGTGCCAGCAGTC--CCGACAGGGGA--TATGGGGGCTCCATTTCTGACTGGAGGGGTTGTG--CCTGTGT
BALB_C-Thymus-1	187083	TRBV19-01	34	TGCCCAGAAGAACGAGATGGCCGTTTTTCTCTGTGCCAGCAGTAT--C--TATGGGGGCTCCATTTCTGACTGGAGGGGTTGTG--CCTGTGT
BALB_C-Thymus-2	84127	TRBV17-01	34	GTATTCTGCCATGTACCTCTGTGCTAGCAGTA--ACCCCGGACAGAGT--TATGGGGGCTCCATTTCTGACTGGAGGGGTTGTG--CCTGTGT
BALB_C-Thymus-2	33284	TRBV16-01	34	ACTCAGCGGTGTATCTTTGTGCAAGCAGCTT--CCCGGGACAGGGGGC--TATGGGGGCTCCATTTCTGACTGGAGGGGTTGTG--CCTGTGT
C57BL_6-Spleen-2	59393	TRBV13-02	34	AGACATCAGTGTACTTCTGTGCCAGCGGTGATG--CGGCAGGGGGCTT--TATGGGGGCTCCATTTCTGACTGGAGGGGTTGTG--CCTGTGT
C57BL_6-Thymus-1	313168	TRBV04-01	34	CTCTGCTGTGTATCTCTGTGCCAGCAGCTAAGGCAGGGGAGAGGGA--TATGGGGGCTCCATTTCTGACTGGAGGGGTTGTG--CCTGTGT
C57BL_6-Thymus-1	103359	TRBV19-01	33	CCAGAAGAACGAGATGGCCGTTTTTCTCTGTGCCAGCAGTATA--TCGG--ATGGGGGCTCCATTTCTGACTGGAGGGGTTGTG--CCTGTGT
BALB_C-Thymus-2	84097	TRBV26-01	33	GGCAGGAGACTCAGCACTGTACCTCTGTGCCAG--GACCGGGACAGGGG--ATGGGGGCTCCATTTCTGACTGGAGGGGTTGTG--CCTGTGT
C57BL_6-Thymus-2	235823	TRBV20-01	33	AATGCATATCTTGAAGACAGAGGCTTATATCTCTGTGGTGCTAGGGA--ATGGGGGCTCCATTTCTGACTGGAGGGGTTGTG--CCTGTGT
C57BL_6-Thymus-1	193233	TRBV16-01	33	ACTCAGCGGTGTATCTTTGTGCAAGCAGC--CTCCCGCCTGACAGGGGG--ATGGGGGCTCCATTTCTGACTGGAGGGGTTGTG--CCTGTGT
C57BL_6-Spleen-1	40120	TRBV13-03	33	TTCCCTTTCTCAGACAGCTGTATATTTCTGTGCCAGCA--CCGGACAGA--ATGGGGGCTCCATTTCTGACTGGAGGGGTTGTG--CCTGTGT
BALB_C-Spleen-1	18290	TRBV13-03	33	TTTCTCAGACAGCTGTATATTTCTGTGCCAGCAGTGA--AACAGGGAGA--ATGAGGGCTCCATTTCTGACTGGAGGGGTTGTG--CCTGTGT
C57BL_6-Thymus-2	123112	TRBV13-02	33	TCTCAGACATCAGTGTACTTCTGTGCCAGCG--GCCCCTCCGGGACAGA--ATGGGGGCTCCATTTCTGACTGGAGGGGTTGTG--CCTGTGT
BALB_C-Thymus-2	26736	TRBV12-02	33	GGACTCTGCCGTGTACTTCTGTGCCAGCTCT--GGGACAGGGGGCAGGG--ATGGGGGCTCCATTTCTGACTGGAGGGGTTGTG--CCTGTGT
C57BL_6-Thymus-2	133312	TRBV12-01	33	AGGACTCTGCTATGTACTTCTGTGCCAGCTCTC--CCCGGGGGGAGGAG--ATGGGGGCTCCATTTCTGACTGGAGGGGTTGTG--CCTGTGT
BALB_C-Thymus-1	205897	TRBV12-01	33	GAACTGGAGGACTCTGCTATGTACTTCTGTGCCAGCTCTC--CCGACTC--ATGGGGGCTCCATTTCTGACTGGAGGGGTTGTG--CCTGTGT
BALB_C-Thymus-1	23206	TRBV05-01	33	GGATCCAGAAGACTCAGCTGTCTATTTTTGTGCCAGCAG--GCCGGGCC--ATGGGGGCTCCATTTCTGACTGGAGGGGTTGTG--CCTGTGT
C57BL_6-Thymus-2	215919	TRBV05-01	33	GAAGACTCAGCTGTCTATTTTTGTGCCAGCAGCC--GGGCCGGGGGCGG--ATGGGGGCTCCATTTCTGACTGGAGGGGTTGTG--CCTGTGT
C57BL_6-Thymus-2	48630	TRBV04-01	33	AGAGCCGGAGGACTCTGCTGTGTATCTCTGTGCCAGCAGCTAA--CACA--ATGGGGGCTCCATTTCTGACTGGAGGGGTTGTG--CCTGTGT
BALB_C-Thymus-1	235771	TRBV04-01	33	GAGGACTCTGCTGTGTATCTCTGTGCCAGCAGC--CATCCGGGACACTG--ATGGGGGCTCCATTTCTGACTGGAGGGGTTGTG--CCTGTGT
BALB_C-Thymus-2	151544	TRBV03-01	33	AGCACTGGAGGACTCAGCTGTGTACTTCTGTGCCAGCAGCTTAG--GGG--ATGGGGGCTCCATTTCTGACTGGAGGGGTTGTG--CCTGTGT
C57BL_6-Thymus-2	257632	TRBV03-01	33	GAGGACTCAGCTGTGTACTTCTGTGCCAGCAGCT--AGGGGGACAGGGG--ATGGGGGCTCCATTTCTGACTGGAGGGGTTGTG--CCTGTGT
BALB_C-Thymus-2	79317	TRBV01-01	33	CCAGGGCAGAACCTTGTACTGCACCTGCAGTGCAGA--CGGGGGCGCGG--ATGGGGGCTCCATTTCTGACTGGAGGGGTTGTG--CCTGTGT
C57BL_6-Thymus-2	165836	TRBV29-01	32	CAAACCAGACATCTGTGTACTTCTGTGCTAGCAGTTT--CACAGGGGGC--ATGGGGGCTCCATTTCTGACTGGAGGGGTTGTG--CCTGTGT
C57BL_6-Spleen-1	41769	TRBV24-01	32	CTCTGAAGAAGACGACTCAGCACTGTAGCTCTGTGCCAGCAGTCTG--CT--TGGGGGCTCCATTTCTGACTGGAGGGGTTGTG--CCTGTGT
C57BL_6-Thymus-1	225764	TRBV24-01	32	ACGACTCAGCACTGTAGCTCTGTGCCAGCAGTCTGTA--GCAGGGGGCTT--TGGGGGCTCCATTTCTGACTGGAGGGGTTGTG--CCTGTGT
BALB_C-Thymus-2	8531	TRBV13-03	32	TGGCTTCCCTTTCTCAGACAGCTGTATATTTCTGTGCCAGC--GAGACTC--TGGGGGCTCCATTTCTGACTGGAGGGGTTGTG--CCTGTGT
C57BL_6-Thymus-1	223802	TRBV05-01	32	AAGACTCAGCTGTCTATTTTTGTGCCAGCAGCCAAGA--TCACAGGGAGG--TGGGGGCTCCATTTCTGACTGGAGGGGTTGTG--CCTGTGT
C57BL_6-Thymus-1	119366	TRBV19-01	32	AGAAGAACGAGATGGCCGTTTTTCTCTGTGCCAGCAGT--TTAGGGGGCT--TGGGGGCTCCATTTCTGACTGGAGGGGTTGTG--CCTGTGT
C57BL_6-Thymus-2	128725	TRBV20-01	31	AAATGCATATCTTGAAGACAGAGGCTTATATCTCTGTGGTGC--CCCGGGG--GGGGGCTCCATTTCTGACTGGAGGGGTTGTG--CCTGTGT
BALB_C-Thymus-1	283275	TRBV19-01	31	CCAGAAGAACGAGATGGCCGTTTTTCTCTGTGCCAGC--CGTATGCGGGAA--GGGGGCTCCATTTCTGACTGGAGGGGTTGTG--CCTGTGT
C57BL_6-Thymus-2	168102	TRBV16-01	31	CCCCAGGACTCAGCGGTGTATCTTTGTGCAAGCAGCTTA--CCAGGGGTGC--GGGGGCTCCATTTCTGACTGGAGGGGTTGTG--CCTGTGT
C57BL_6-Thymus-2	197132	TRBV15-01	31	AGAACCCAAGGACTCAGCTGTGTATCTGTGTGCCAGCAG--CAGGGACAGA--GGGGGCTCCATTTCTGACTGGAGGGGTTGTG--CCTGTGT
C57BL_6-Thymus-2	70400	TRBV14-01	31	AAAGCAGGGCGACACAGCCACCTATCTCTGTGCCAGCAG--GTCCGGGACG--GGGGGCTCCATTTCTGACTGGAGGGGTTGTG--CCTGTGT
BALB_C-Spleen-2	28962	TRBV13-02	31	CCCCCTCTCAGACATCAGTGTACTTCTGTGCCAGCGGTGA--CACAGGGAA--GGGGGCTCCATTTCTGACTGGAGGGGTTGTG--CCTGTGT
BALB_C-Thymus-2	218632	TRBV13-01	31	CTCCCTCTCAGACATCTTTGTACTTCTGTGCCAGCA--TTACAGGGAGAGG--GGGGGCTCCATTTCTGACTGGAGGGGTTGTG--CCTGTGT
C57BL_6-Thymus-1	220669	TRBV13-01	31	TTCTCCCTCTCAGACATCTTTGTACTTCTGTGCCAGCAGTG--GGGGACAG--GGGGGCTCCATTTCTGACTGGAGGGGTTGTG--CCTGTGT
C57BL_6-Thymus-1	8509	TRBV01-01	31	GAGCCAGGGCAGAACCTTGTACTGCACCTGCAGTGCAGA--CAGGACAGGG--GGGGGCTCCATTTCTGACTGGAGGGGTTGTG--CCTGTGT
C57BL_6-Thymus-1	80207	TRBV29-01	31	TCTGCTAAAACAAACCAGACATCTGTGTACTTCTGTGCTAGCAGT--CCCG--GGGGGCTCCATTTCTGACTGGAGGGGTTGTG--CCTGTGT
BALB_C-Thymus-2	231407	TRBV29-01	31	TGCTAAAACAAACCAGACATCTGTGTACTTCTGTGCTAGCAGTTT--GGAA--GGGGGCTCCATTTCTGACTGGAGGGGTTGTG--CCTGTGT
C57BL_6-Thymus-1	98572	TRBV29-01	31	ACCAGACATCTGTGTACTTCTGTGCTAGCAGTTTA--GAGACAGGGGGCGG--GGGGGCTCCATTTCTGACTGGAGGGGTTGTG--CCTGTGT
C57BL_6-Thymus-1	39055	TRBV15-01	30	ACAGAACCCAAGGACTCAGCTGTGTATCTGTGTGCCAGCAGTT--GAGGGAT--GGGGCTCCATTTCTGACTGGAGGGGTTGTG--CCTGTGT
BALB_C-Thymus-1	55530	TRBV13-02	30	ACCCCCTCTCAGACATCAGTGTACTTCTGTGCCAGCGGTGAT--AGTGGACA--GGGGCTCCATTTCTGACTGGAGGGGTTGTG--CCTGTGT
C57BL_6-Thymus-2	246322	TRBV12-01	30	CCTTGGAACTGGAGGACTCTGCTATGTACTTCTGTGCCAGCTCTCTC--GTT--GGGGCTCCATTTCTGACTGGAGGGGTTGTG--CCTGTGT
BALB_C-Thymus-2	163521	TRBV02-01	30	GACTCGGCCACATACTTCTGTGCCAGCAGCCAAGA--TCGAATAGGGGGCTT--GGGGCTCCATTTCTGACTGGAGGGGTTGTG--CCTGTGT
BALB_C-Spleen-2	4543	TRBV29-01	29	ATTCTGCTAAAACAAACCAGACATCTGTGTACTTCTGTGCTAGCA--AGGGGA--GGGCTCCATTTCTGACTGGAGGGGTTGTG--CCTGTGT
BALB_C-Thymus-1	260035	TRBV29-01	29	CTGCTAAAACAAACCAGACATCTGTGTACTTCTGTGCTAGCAGTTTAT--TGA--GGGCTCCATTTCTGACTGGAGGGGTTGTG--CCTGTGT
BALB_C-Thymus-2	75118	TRBV16-01	29	AACCCCAGGACTCAGCGGTGTATCTTTGTGCAAGCAGCTTA--TCCCAACTGA--GGGCTCCATTTCTGACTGGAGGGGTTGTG--CCTGTGT
BALB_C-Thymus-2	198829	TRBV02-01	28	TCTAAAGCCTGATGACTCGGCCACATACTTCTGTGCCAGCAG--GCCTGGGCCT--GGCTCCATTTCTGACTGGAGGGGTTGTG--CCTGTGT
C57BL_6-Thymus-1	165824	TRBV24-01	27	AGACGACTCAGCACTGTAGCTCTGTGCCAGCA--CCGGGACAGGGGCCCCGGGGA--GCTCCATTTCTGACTGGAGGGGTTGTG--CCTGTGT
C57BL_6-Thymus-1	298859	TRBV05-01	26	AGACTCAGCTGTCTATTTTTGTGCCAGCAGCCA--CTTGACAGGGGCCCCGGGGAG--CTCCATTTCTGACTGGAGGGGTTGTG--CCTGTGT
BALB_C-Spleen-1	49914	TRBV02-01	24	CTAAAGCCTGATGACTCGGCCACATACTTCTGTGCCAGCAGCCAAGA--GAAAAGGAC--CCATTTCTGACTGGAGGGGTTGTG--CCTGTGT
C57BL_6-Thymus-2	87661	TRBV15-01	22	AACCTACAGAACCCAAGGACTCAGCTGTGTATCTGTGTGCCAGCAGTT--GGGAGCATGG--ATTTCTGACTGGAGGGGTTGTG--CCTGTGT
BALB_C-Thymus-1	173644	TRBV14-01	21	CCAGTCTGCAAAGCAGGGCGACACAGCCACCTATCTCTGTGCCAGCAGCT--CCGGGACGG--TTTCTGACTGGAGGGGTTGTG--CCTGTGT

## Sheet: TRBJ1-02
Rearranged TR genes using TRBJ1-7 in C57BL/6 and Balb/c mice.
The sequences are aligned on the left. The first 6 nt of TRBJ1-2 are shown. Then, from left to right, are shown: the sequence of GL DNA retained in the D-J coding joint (red), the N-D-N region (D nucleotides in yellow, N nucleotides in black), and the end of the V gene. the different elements are spaced by double hyphens. When GL DNA retention extends upstream of the -31 RSS, the extra nucleotide…
Source	seq ID	V gene	GL retention length	TRB gene sequence
				Germline sequence: TCGGACAAAGCATGTCCTCCGTG--TCCATATTCGAGTATCTGTATTCTGATGTG--CAAACTCCGACTACACC
C57BL_6-Thymus-1	53140	TRBV01-01	31	GGGCAGAACCTTGTACTGCACCTGCAGTGCAGATACCCA--GTCCATATTCGAGTATCTGTATTCTGATGTG--CAAACTCCGACTACACC
C57BL_6-Thymus-2	133498	TRBV14-01	31	AGGGCGACACAGCCACCTATCTCTGTGCCAGCAG--GCAGG--GTCCATATTCGAGTATCTGTATTCTGATGTG--CAAACTCCGACTACACC
BALB_C-Spleen-1	7868	TRBV01-01	31	GGGCAGAACCTTGTACTGCACCTGCAGTGCAGA--TTACAG--GTCCATATTCGAGTATCTGTATTCTGATGTG--CAAACTCCGACTACACC
BALB_C-Thymus-1	130666	TRBV20-01	30	ATCTTGAAGACAGAGGCTTATATCTCTGTGGTG--GCGTCAA--TCCATATTCGAGTATCTGTATTCTGATGTG--CAAACTCCGACTACACC
BALB_C-Thymus-2	151769	TRBV16-01	30	AGGACTCAGCGGTGTATCTTTGTGCAAGCAGCT--CCAGAAT--TCCATATTCGAGTATCTGTATTCTGATGTG--CAAACTCCGACTACACC
C57BL_6-Spleen-2	42228	TRBV26-01	30	ACTCAGCACTGTACCTCTGTGCCAGCAGTCTGTC--GGGCAA--TCCATATTCGAGTATCTGTATTCTGATGTG--CAAACTCCGACTACACC
C57BL_6-Spleen-2	61017	TRBV05-01	30	TCAGCTGTCTATTTTTGTGCCAGCAGCCAA--ACAGGGGAGA--TCCATATTCGAGTATCTGTATTCTGATGTG--CAAACTCCGACTACACC
C57BL_6-Thymus-1	163935	TRBV26-01	30	ACTCAGCACTGTACCTCTGTGCCAGCAGTACTGGGACAAA--TCCATATTCGAGTATCTGTATTCTGATGTG--CAAACTCCGACTACACC
C57BL_6-Thymus-1	225898	TRBV05-01	30	ACTCAGCTGTCTATTTTTGTGCCAGCAGCCAAGGGGGACA--TCCATATTCGAGTATCTGTATTCTGATGTG--CAAACTCCGACTACACC
C57BL_6-Thymus-1	282400	TRBV05-01	30	TCAGCTGTCTATTTTTGTGCCAGCAGCC--CCGGACAGGTTT--TCCATATTCGAGTATCTGTATTCTGATGTG--CAAACTCCGACTACACC
C57BL_6-Thymus-1	319622	TRBV29-01	30	GACATCTGTGTACTTCTGTGCTAGCAGT--CCCATGACAGGA--TCCATATTCGAGTATCTGTATTCTGATGTG--CAAACTCCGACTACACC
C57BL_6-Thymus-2	177686	TRBV29-01	30	GACATCTGTGTACTTCTGTGCTAGCAGTTT--TCAGGGGGAT--TCCATATTCGAGTATCTGTATTCTGATGTG--CAAACTCCGACTACACC
C57BL_6-Thymus-2	200693	TRBV17-01	30	ATTCTGCCATGTACCTCTGTGCTAGCAGTAG--ACGACAGAA--TCCATATTCGAGTATCTGTATTCTGATGTG--CAAACTCCGACTACACC
C57BL_6-Thymus-2	279996	TRBV19-01	30	AGATGGCCGTTTTTCTCTGTGCCAGCAGT--CCAGACACCTA--TCCATATTCGAGTATCTGTATTCTGATGTG--CAAACTCCGACTACACC
C57BL_6-Thymus-2	306937	TRBV19-01	30	GATGGCCGTTTTTCTCTGTGCCAGCAGT--CGGGACAGGGGA--TCCATATTCGAGTATCTGTATTCTGATGTG--CAAACTCCGACTACACC
C57BL_6-Thymus-2	310434	TRBV24-01	30	TCAGCACTGTAGCTCTGTGCCAGCAGTCTGTA--GATAGATC--TCCATATTCGAGTATCTGTATTCTGATGTG--CAAACTCCGACTACACC
BALB_C-Thymus-1	56056	TRBV19-01	29	AGAACGAGATGGCCGTTTTTCTCTGTGCCAGCA--TTCCAGAA--CCATATTCGAGTATCTGTATTCTGATGTG--CAAACTCCGACTACACC
BALB_C-Thymus-1	116690	TRBV13-02	29	CTCAGACATCAGTGTACTTCTGTGCCAGCGGTG--GGACGGGG--CCATATTCGAGTATCTGTATTCTGATGTG--CAAACTCCGACTACACC
BALB_C-Thymus-1	138103	TRBV02-01	29	GACTCGGCCACATACTTCTGTGCCAGCAGCC--CCCGCCGGGG--CCATATTCGAGTATCTGTATTCTGATGTG--CAAACTCCGACTACACC
BALB_C-Thymus-1	260034	TRBV12-02	29	CTGCCGTGTACTTCTGTGCCAGCTCTC--CCGGACAGGGGGGA--CCATATTCGAGTATCTGTATTCTGATGTG--CAAACTCCGACTACACC
BALB_C-Thymus-1	290516	TRBV04-01	29	CTGCTGTGTATCTCTGTGCCAGCAGCTAAG--CCGGGACAGAC--CCATATTCGAGTATCTGTATTCTGATGTG--CAAACTCCGACTACACC
BALB_C-Thymus-2	79314	TRBV31-01	29	CCACTCTGGCTTCTACCTCTGTGCCTGGAGTCT--CGGGACAG--CCATATTCGAGTATCTGTATTCTGATGTG--CAAACTCCGACTACACC
BALB_C-Thymus-2	128014	TRBV01-01	29	AGGGCAGAACCTTGTACTGCACCTGCAGTGC--GGACAGGTCA--CCATATTCGAGTATCTGTATTCTGATGTG--CAAACTCCGACTACACC
BALB_C-Thymus-2	245823	TRBV19-01	29	CAGAAGAACGAGATGGCCGTTTTTCTCTGTGCCAG--ACAGGA--CCATATTCGAGTATCTGTATTCTGATGTG--CAAACTCCGACTACACC
BALB_C-Thymus-2	261076	TRBV17-01	29	GAGTATTCTGCCATGTACCTCTGTGCTAGCAGTAG--GGACGG--CCATATTCGAGTATCTGTATTCTGATGTG--CAAACTCCGACTACACC
BALB_C-Thymus-2	272208	TRBV04-01	29	TGCTGTGTATCTCTGTGCCAGCAGCTAAGA--GAGACAGATTA--CCATATTCGAGTATCTGTATTCTGATGTG--CAAACTCCGACTACACC
C57BL_6-Spleen-2	58003	TRBV24-01	29	TCAGCACTGTAGCTCTGTGCCAGCAGTCT--GTAGGCAGGGTG--CCATATTCGAGTATCTGTATTCTGATGTG--CAAACTCCGACTACACC
C57BL_6-Spleen-2	76698	TRBV24-01	29	TCAGCACTGTAGCTCTGTGCCAGCAG--CCTGTAGGCAGGGTG--CCATATTCGAGTATCTGTATTCTGATGTG--CAAACTCCGACTACACC
C57BL_6-Thymus-1	14548	TRBV03-01	29	GGACTCAGCTGTGTACTTCTGTGCCAGCAGCT--CCTTACAGG--CCATATTCGAGTATCTGTATTCTGATGTG--CAAACTCCGACTACACC
C57BL_6-Thymus-1	119421	TRBV22-01	29	AGACTCAGTGTTATACCTCTGTGCCAGCAGTTGTC--GGGGGA--CCATATTCGAGTATCTGTATTCTGATGTG--CAAACTCCGACTACACC
C57BL_6-Thymus-1	245111	TRBV24-01	29	GACGACTCAGCACTGTAGCTCTGTGCCAGCAGTCT--GTACAC--CCATATTCGAGTATCTGTATTCTGATGTG--CAAACTCCGACTACACC
C57BL_6-Thymus-1	295815	TRBV13-02	29	ACATCAGTGTACTTCTGTGCCAGCGGTG--CCCGGACAGGGAC--CCATATTCGAGTATCTGTATTCTGATGTG--CAAACTCCGACTACACC
C57BL_6-Thymus-1	310069	TRBV05-01	29	CTCAGCTGTCTATTTTTGTGCCAGCAGCCA--CCCGGACTCTC--CCATATTCGAGTATCTGTATTCTGATGTG--CAAACTCCGACTACACC
C57BL_6-Thymus-2	130650	TRBV26-01	29	ACTCAGCACTGTACCTCTGTGCCAGCAGTCT--CCAGGGACAA--CCATATTCGAGTATCTGTATTCTGATGTG--CAAACTCCGACTACACC
C57BL_6-Thymus-2	145512	TRBV05-01	29	GAAGACTCAGCTGTCTATTTTTGTGCC--GGAAGCCGGGACAA--CCATATTCGAGTATCTGTATTCTGATGTG--CAAACTCCGACTACACC
C57BL_6-Thymus-2	198161	TRBV14-01	29	AGGGCGACACAGCCACCTATCTCTGTGCCAGC--CGGGACAGG--CCATATTCGAGTATCTGTATTCTGATGTG--CAAACTCCGACTACACC
BALB_C-Spleen-1	8681	TRBV03-01	28	GACTCAGCTGTGTACTTCTGTGCCAGCAGC--CCGGACAGGGGG--CATATTCGAGTATCTGTATTCTGATGT-- CAAACTCCGACTACACC
BALB_C-Spleen-1	37722	TRBV05-01	28	AAGACTCAGCTGTCTATTTTTGTGCCAGCAGCCA GACAGGGG--CATATTCGAGTATCTGTATTCTGATGTG--CAAACTCCGACTACACC
BALB_C-Spleen-2	44343	TRBV05-01	28	CGTGGATCCAGAAGACTCAGCTGTCTATTTTTGTGCCAGCAG--CATATTCGAGTATCTGTATTCTGATGTG--CAAACTCCGACTACACC
BALB_C-Spleen-2	51051	TRBV19-01	28	GAAGAACGAGATGGCCGTTTTTCTCTGTGCCAGCAGTATA--CT--CATATTCGAGTATCTGTATTCTGATGTG--CAAACTCCGACTACACC
BALB_C-Thymus-1	98937	TRBV04-01	28	AGGACTCTGCTGTGTATCTCTGTGCCAGCAGCTAAG--GGCCAG--CATATTCGAGTATCTGTATTCTGATGTG--CAAACTCCGACTACACC
BALB_C-Thymus-1	111613	TRBV29-01	28	ACCAGACATCTGTGTACTTCTGTGCTAGCAGT--CCCCGCGTTC--CATATTCGAGTATCTGTATTCTGATGTG--CAAACTCCGACTACACC
BALB_C-Thymus-1	148614	TRBV15-01	28	AGGACTCAGCTGTGTATCTGTGTGCCAGCAG--CCCACAGGGGG--CATATTCGAGTATCTGTATTCTGATGTG--CAAACTCCGACTACACC
C57BL_6-Thymus-1	152259	TRBV19-01	28	GAGATGGCCGTTTTTCTCTGTGCCAGCAG--AGAGGACAGGTCT--CATATTCGAGTATCTGTATTCTGATGTG--CAAACTCCGACTACACC
C57BL_6-Thymus-1	201838	TRBV19-01	28	CGAGATGGCCGTTTTTCTCTGTGCCAGCAG--CCCCCGGGGATT--CATATTCGAGTATCTGTATTCTGATGTG--CAAACTCCGACTACACC
C57BL_6-Thymus-1	296042	TRBV24-01	28	ACGACTCAGCACTGTAGCTCTGTGCCAGCAGTC--CCCGATAAG--CATATTCGAGTATCTGTATTCTGATGTG--CAAACTCCGACTACACC
C57BL_6-Thymus-2	97932	TRBV13-01	28	GACATCTTTGTACTTCTGTGCCAGCAGTGA--CCGGGACAGGGA--CATATTCGAGTATCTGTATTCTGATGTG--CAAACTCCGACTACACC
C57BL_6-Thymus-2	146946	TRBV14-01	28	GCAGGGCGACACAGCCACCTATCTCTGTGCCAGCA--CCGGGGT--CATATTCGAGTATCTGTATTCTGATGTG--CAAACTCCGACTACACC
BALB_C-Spleen-1	60497	TRBV16-01	27	TCAGCGGTGTATCTTTGTGCAAGCAGCTTAGA--TTAGCCAGGGG--ATATTCGAGTATCTGTATTCTGATGTG--CAAACTCCGACTACACC
BALB_C-Spleen-1	72326	TRBV15-01	27	ACTCAGCTGTGTATCTGTGTGCCAGCAGTTTAGC--TCAGGGGGA--ATATTCGAGTATCTGTATTCTGATGTG--CAAACTCCGACTACACC
BALB_C-Spleen-2	36858	TRBV12-01	27	GACTCTGCTATGTACTTCTGTGCCAGCTCTCTC--GTGGGGTTTG--ATATTCGAGTATCTGTATTCTGATGTG--CAAACTCCGACTACACC
BALB_C-Spleen-2	45742	TRBV13-02	27	TCTCAGACATCAGTGTACTTCTGTGCCAGCGGTG--GGGACAGGG--ATATTCGAGTATCTGTATTCTGATGTG--CAAACTCCGACTACACC
BALB_C-Spleen-2	73233	TRBV17-01	27	AGTATTCTGCCATGTACCTCTGTGCTAGCAGT--CCAGGGGATGA--ATATTCGAGTATCTGTATTCTGATGTG--CAAACTCCGACTACACC
BALB_C-Thymus-1	74468	TRBV24-01	27	AGAAGACGACTCAGCACTGTAGCTCTGTGCCAGC--CCGGGGCAG--ATATTCGAGTATCTGTATTCTGATGTG--CAAACTCCGACTACACC
BALB_C-Thymus-1	151674	TRBV29-01	27	CCAGACATCTGTGTACTTCTGTGCTAGCAG--AAATAACGGGGAG--ACATTCGAGTATCTGTATTCTGATGTG--CAAACTCCGACTACACC
BALB_C-Thymus-1	154346	TRBV13-02	27	CTCTCAGACATCAGTGTACTTCTGTGCCAGCGGTGA--AACAGGG--ATATTCGAGTATCTGTATTCTGATGTG--CAAACTCCGACTACACC
BALB_C-Thymus-1	166867	TRBV05-01	27	AAGACTCAGCTGTCTATTTTTGTGCCAGCAGCCAAGA--AGCCCG--ATATTCGAGTATCTGTATTCTGATGTG--CAAACTCCGACTACACC
BALB_C-Thymus-1	221036	TRBV01-01	27	AGAACCTTGTACTGCACCTGCAGTGCA--ATCAAGAGAGGGGGAA--ATATTCGAGTATCTGTATTCTGATGTG--CAAACTCCGACTACACC
BALB_C-Thymus-1	226283	TRBV15-01	27	CCCAAGGACTCAGCTGTGTATCTGTGTGCCAGCAGTT--CCAGAA--ATATTCGAGTATCTGTATTCTGATGTG--CAAACTCCGACTACACC
BALB_C-Thymus-1	226858	TRBV13-03	27	CCTTTCTCAGACAGCTGTATATTTCTGTGCCAGC--CCGACAATA--ATATTCGAGTATCTGTATTCTGATGTG--CAAACTCCGACTACACC
BALB_C-Thymus-1	226859	TRBV13-03	27	CCTTTCTCAGACAGCTGTATATTTCTGTGCCAGC--TCGGCAAAA--ATATTCGAGTATCTGTATTCTGATGTG--CAAACTCCGACTACACC
BALB_C-Thymus-1	262690	TRBV24-01	27	GACGACTCAGCACTGTAGCTCTGTGCCAGCAGTCT--GTTTCAGG--ATATTCGAGTATCTGTATTCTGATGTG--CAAACTCCGACTACACC
BALB_C-Thymus-1	263685	TRBV26-01	27	GGAGACTCAGCACTGTACCTCTGTGCCAGCAGTCTG--GCAGGGA--ATATTCGAGTATCTGTATTCTGATGTG--CAAACTCCGACTACACC
BALB_C-Thymus-2	77104	TRBV12-01	27	AGGACTCTGCTATGTACTTCTGTGCCAGCTCTCTC--GCAGGGGT--ATATTCGAGTATCTGTATTCTGATGTG--CAAACTCCGACTACACC
BALB_C-Thymus-2	138615	TRBV04-01	27	GAGGACTCTGCTGTGTATCTCTGTGCCAGCAGCTAAG--GCCCAG--ATATTCGAGTATCTGTATTCTGATGTG--CAAACTCCGACTACACC
BALB_C-Thymus-2	154569	TRBV01-01	27	CAGAACCTTGTACTGCACCTGCAGTGCAGA--TCGAGGGACAGGT--ATATTCGAGTATCTGTATTCTGATGTG--CAAACTCCGACTACACC
BALB_C-Thymus-2	176629	TRBV29-01	27	ACATCTGTGTACTTCTGTGCTAGCAGTTTA--CGGGGACAGGGGA--ATATTCGAGTATCTGTATTCTGATGTG--CAAACTCCGACTACACC
BALB_C-Thymus-2	254468	TRBV12-01	27	CTCTGCTATGTACTTCTGTGCCAGCTCTCTC--GCCAGGACAGGA--ATATTCGAGTATCTGTATTCTGATGTG--CAAACTCCGACTACACC
C57BL_6-Thymus-1	27977	TRBV26-01	27	CAGGAGACTCAGCACTGTACCTCTGTGCCAGCAGTCTG--GGCAG--ATATTCGAGTATCTGTATTCTGATGTG--CAAACTCCGACTACACC
C57BL_6-Thymus-1	210836	TRBV19-01	27	GAGATGGCCGTTTTTCTCTGTGCCAGCAGT--CTGACAGGGGTGG--ATATTCGAGTATCTGTATTCTGATGTG--CAAACTCCGACTACACC
C57BL_6-Thymus-1	214930	TRBV02-01	27	TCGGCCACATACTTCTGTGCCAGCAGCCAAGA--TGAGGGGGCGG--ATATTCGAGTATCTGTATTCTGATGTG--CAAACTCCGACTACACC
C57BL_6-Thymus-1	218100	TRBV02-01	27	TGACTCGGCCACATACTTCTGTGCCAGCAG--GCTCCCGGGACAA--ATATTCGAGTATCTGTATTCTGATGTG--CAAACTCCGACTACACC
C57BL_6-Thymus-1	297972	TRBV12-01	27	ACTCTGCTATGTACTTCTGTGCCAGCTCTCTC--GACGGACATCT--ATATTCGAGTATCTGTATTCTGATGTG--CAAACTCCGACTACACC
C57BL_6-Thymus-1	319173	TRBV19-01	27	GAAGAACGAGATGGCCGTTTTTCTCTGTGCCAGCAG--GACAAAA--ATATTCGAGTATCTGTATTCTGATGTG--CAAACTCCGACTACACC
C57BL_6-Thymus-2	25946	TRBV22-01	27	AGACTCAGTGTTATACCTCTGTGCCAGCAGTTG--GGGGGACATA--ATATTCGAGTATCTGTATTCTGATGTG--CAAACTCCGACTACACC
C57BL_6-Thymus-2	180876	TRBV13-01	27	TCAGACATCTTTGTACTTCTGTGCCAGCAGTGATG--CTGGACAG--ATATTCGAGTATCTGTATTCTGATGTG--CAAACTCCGACTACACC
BALB_C-Thymus-1	192416	TRBV14-01	26	ACAGCCACCTATCTCTGTGCCAGCAGTTTCT--TAACAGGGGGCTG--TATTCGAGTATCTGTATTCTGATGTG--CAAACTCCGACTACACC
BALB_C-Thymus-1	262696	TRBV04-01	26	GACTCTGCTGTGTATCTCTGTGCCAGCAGC--CTCCGGGACAGGGT--TATTCGAGTATCTGTATTCTGATGTG--CAAACTCCGACTACACC
BALB_C-Thymus-1	295268	TRBV03-01	26	GGACTCAGCTGTGTACTTCTGTGCCAGCAGCTTAGACCGGGGGG--TATTCGAGTATCTGTATTCTGATGTG--CAAACTCCGACTACACC
BALB_C-Thymus-2	65251	TRBV04-01	26	ACTCTGCTGTGTATCTCTGTGCCAGCAGCT--CCGGGACAGGGGTT--TATTCGAGTATCTGTATTCTGATGTG--CAAACTCCGACTACACC
BALB_C-Thymus-2	196399	TRBV15-01	26	TCAGCTGTGTATCTGTGTGCCAGCAGTT--CCGACAGGGGGCGATT--TATTCGAGTATCTGTATTCTGATGTG--CAAACTCCGACTACACC
C57BL_6-Thymus-2	114325	TRBV24-01	26	CTCAGCACTGTAGCTCTGTGCCAGCAGTCT--CGGGACAGGGGTTT--TATTCGAGTATCTGTATTCTGATGTG--CAAACTCCGACTACACC
C57BL_6-Thymus-2	280651	TRBV05-01	26	AGCTGTCTATTTTTGTGCCAGCAGCC--TCTGGACAGGGGGCTTCC--TATTCGAGTATCTGTATTCTGATGTG--CAAACTCCGACTACACC
C57BL_6-Thymus-2	297320	TRBV12-01	26	CTCTGCTATGTACTTCTGTGCCAGCTCTC--CCTTCCGACAGGGCC--TATTCGAGTATCTGTATTCTGATGTG--CAAACTCCGACTACACC
C57BL_6-Thymus-2	309054	TRBV17-01	26	TAGAGTATTCTGCCATGTACCTCTGTGCTAGCAGT--ACAGGGGGC--TATTCGAGTATCTGTATTCTGATGTG--CAAACTCCGACTACACC
BALB_C-Spleen-1	80180	TRBV12-02	25	TAGAGGACTCTGCCGTGTACTTCTGTGCCAGCTCT--TACAGGGGTC--ATTCGAGTATCTGTATTCTGATGTG--CAAACTCCGACTACACC
BALB_C-Thymus-1	117858	TRBV22-01	25	CTCTGAGGCTGGAGACTCAGTGTTATACCTCTGTGCCAGCAG--AAA--ATTCGAGTATCTGTATTCTGATGTG--CAAACTCCGACTACACC
BALB_C-Thymus-1	148271	TRBV24-01	25	AGACGACTCAGCACTGTAGCTCTGTGCCAGCAGTCTGTA--TTGGAG--ATTCGAGTATCTGTATTCTGATGTG--CAAACTCCGACTACACC
BALB_C-Thymus-2	67055	TRBV13-03	25	CAGCTGTATATTTCTGTGCCAGCAGTGAT--ATGGGACAGGGGGCGA--ATTCGAGTATCTGTATTCTGATGTG--CAAACTCCGACTACACC
BALB_C-Thymus-2	67411	TRBV01-01	25	CCAGGGCAGAACCTTGTACTGCACCTGCAGTGC--TACCGGGACAGC--ATTCGAGTATCTGTATTCTGATGTG--CAAACTCCGACTACACC
BALB_C-Thymus-2	71267	TRBV20-01	25	TATCTTGAAGACAGAGGCTTATATCTCTGTGGTGCTA--CTTCAGGG--ATTCGAGTATCTGTATTCTGATGTG--CAAACTCCGACTACACC
BALB_C-Thymus-2	83581	TRBV01-01	25	GAGCCAGGGCAGAACCTTGTACTGCAC--TAAGAGGGGACAGGGTGA--ATTCGAGTATCTGTATTCTGATGTG--CAAACTCCGACTACACC
BALB_C-Thymus-2	97717	TRBV13-01	25	CTTTGTACTTCTGTGCCAGCAGTGATG--TGGGACAGGGGGCGAGGG--ATTCGAGTATCTGTATTCTGATGTG--CAAACTCCGACTACACC
BALB_C-Thymus-2	178660	TRBV05-01	25	AGAAGACTCAGCTGTCTATTTTTGTGCCAGCAGCCAAG--GGACAGA--ATTCGAGTATCTGTATTCTGATGTG--CAAACTCCGACTACACC
C57BL_6-Thymus-1	27766	TRBV01-01	25	CAACATGAGCCAGGGCAGAACCTTGTACTGCACCTGCAGTGCA--AG--ATTCGAGTATCTGTATTCTGATGTG--CAAACTCCGACTACACC
C57BL_6-Thymus-1	154093	TRBV13-01	25	TCAGACATCTTTGTACTTCTGTGCCAGCAGTGATG--CCAGGGGGCG--ATTCGAGTATCTGTATTCTGATGTG--CAAACTCCGACTACACC
C57BL_6-Thymus-1	163937	TRBV03-01	25	ACTCAGCTGTGTACTTCTGTGCCAGCAGCTT--GACAGGGGGCGGAA--ATTCGAGTATCTGTATTCTGATGTG--CAAACTCCGACTACACC
C57BL_6-Thymus-1	180382	TRBV31-01	25	GCTGCTTCTCAGCCACTCTGGCTTCTACCTCTGTGCCTGGAG--AGA--ATTCGAGTATCTGTATTCTGATGTG--CAAACTCCGACTACACC
C57BL_6-Thymus-1	264146	TRBV13-01	25	AGACATCTTTGTACTTCTGTGCCAGCAG--CGCTGGGACAGGGAAAA--ATTCGAGTATCTGTATTCTGATGTG--CAAACTCCGACTACACC
C57BL_6-Thymus-2	179134	TRBV04-01	25	GCCGGAGGACTCTGCTGTGTATCTCTGTGCCAGCAGCTAA--CCCAG--ATTCGAGTATCTGTATTCTGATGTG--CAAACTCCGACTACACC
BALB_C-Thymus-2	106781	TRBV02-01	25	ACTCGGCCACATACTTCTGTGCCAGCAGCC--GCCGACAGGATTTGC--ATTCGAGTATCTGTATTCTGATGTG-CAAACTCCGACTACACC
BALB_C-Thymus-1	197364	TRBV13-02	24	CAGACATCAGTGTACTTCTGTGCCAGCGGTG--CCCCCGGGACAGGGT--TTCGAGTATCTGTATTCTGATGTG--CAAACTCCGACTACACC
BALB_C-Thymus-1	275268	TRBV24-01	24	ACGACTCAGCACTGTAGCTCTGTGCCAGCAGC--CCGGACAGGGGGCT--TTCGAGTATCTGTATTCTGATGTG--CAAACTCCGACTACACC
BALB_C-Thymus-2	84119	TRBV14-01	24	GGGCGACACAGCCACCTATCTCTGTGCCAGCAGTTTC--CACAGGGAG--TTCGAGTATCTGTATTCTGATGTG--CAAACTCCGACTACACC
C57BL_6-Thymus-1	182502	TRBV05-01	24	TCCAGAAGACTCAGCTGTCTATTTTTGTGCCAGCAGCC--GAACAGGG--TTCGAGTATCTGTATTCTGATGTG--CAAACTCCGACTACACC
BALB_C-Thymus-1	44910	TRBV24-01	23	GAAGAAGACGACTCAGCACTGTAGCTCTGTGCCAGCAG--CCCCGACAA--TCGAGTATCTGTATTCTGATGTG--CAAACTCCGACTACACC
BALB_C-Thymus-1	60366	TRBV22-01	23	GGCTGGAGACTCAGTGTTATACCTCTGTGCCAGC--GGTGACAGGGGAA--TCGAGTATCTGTATTCTGATGTG--CAAACTCCGACTACACC
BALB_C-Thymus-1	157525	TRBV24-01	23	GACGACTCAGCACTGTAGCTCTGTGCCAGCAGTCT--GACAGGGGAGGA--TCGAGTATCTGTATTCTGATGTG--CAAACTCCGACTACACC
C57BL_6-Thymus-1	167611	TRBV20-01	23	ATCTTGAAGACAGAGGCTTATATCTCTGTGGTGC--CGGACAGGGGCGA--TCGAGTATCTGTATTCTGATGTG--CAAACTCCGACTACACC
C57BL_6-Thymus-1	225675	TRBV13-02	23	ACCCCCTCTCAGACATCAGTGTACTTCTGTGCCAGCGGTGAT--CTCCC--TCGAGTATCTGTATTCTGATGTG--CAAACTCCGACTACACC
C57BL_6-Thymus-1	247918	TRBV16-01	23	TCAGCGGTGTATCTTTGTGCAAGCAGCTTAGA--AGATAGGGCGAGGGG--TCGAGTATCTGTATTCTGATGTG--CAAACTCCGACTACACC
C57BL_6-Thymus-1	268959	TRBV16-01	23	CAGGACTCAGCGGTGTATCTTTGTGCAAGCAGCT--CGAGGGGGAAGGG--TCGAGTATCTGTATTCTGATGTG--CAAACTCCGACTACACC
C57BL_6-Thymus-2	99847	TRBV14-01	23	TCAAGATCCAGTCTGCAAAGCAGGGCGACACAGCCACCTA--CCCTCGA--TCGAGTATCTGTATTCTGATGTG--CAAACTCCGACTACACC
C57BL_6-Thymus-2	289270	TRBV16-01	23	CCCCAGGACTCAGCGGTGTATCTTTGTGCAAGCAGCTTAG--TGGGAGG--TCGAGTATCTGTATTCTGATGTG--CAAACTCCGACTACACC
C57BL_6-Spleen-2	33575	TRBV13-02	22	TCAGACATCAGTGTACTTCTGTGCCAGCGGTGA--GACGGGACAGGGGA--TCGAGTATCTGTATTCTGATGTG--CAAACTCCGACTACACC
C57BL_6-Thymus-1	64237	TRBV03-01	21	GGACTCAGCTGTGTACTTCTGTGCCAGCAGCTTAG--TTGGGACAGGGCC--CGAGTATCTGTATTCTGATGTG--CAAACTCCGACTACACC
C57BL_6-Thymus-1	307493	TRBV23-01	11	CGAAGCAGAAGACTCAGCACTGTACTTGTGCTCCAGCAGTCAATC--AAGGGACAGGTCGA--ATTCTGATGTG--CAAACTCCGACTACACC
BALB_C-Thymus-1	113110	TRBV22-01	6	AGTTCCTCTGAGGCTGGAGACTCAGTGTTATACCTCTGTGCCAGCAGTTGT--AGGGAGGGGCTGG--GATGTG--CAAACTCCGACTACACC
